# Supplementary material
Source: PubMed Central journal article supplement (PMC7120863)
Supplement: 978-90-368-1841-4_2_MOESM1_ESM.pdf [file 978-90-368-1841-4_2_MOESM1_ESM.pdf]

# Beeldvormende technieken bij siliconenborstprothesen

Maaïke P.M. Gielens, Pieter G.L. Koolen, Roland A.E.C. Hermens en Matthieu J.C.M. Rutten

## DAMES EN HEREN,

De afgelopen tijd is er veel debat geweest over de borstimplantaten van het Franse merk Poly Implant Prothèse (PIP). Deze implantaten hebben een hogere kans op scheuren van de siliconenenveloppe en daardoor op lekkage van siliconen. Patiënten met siliconenborstprothesen zijn ongerust geworden, waardoor frequent lichamelijk en beeldvormend onderzoek wordt verricht om te zien of de borstprothesen nog intact zijn. Welk beeldvormend onderzoek is er en welke patiënten komen hiervoor in aanmerking?

**P**ijn in de borst bij al dan niet siliconen borstimplantaten is een goede voorspeller voor een implantaatruptuur, maar de afwezigheid van pijn sluit een ruptuur niet uit.<sup>1</sup> Het klinisch onderzoek is bij de meeste patiënten niet betrouwbaar.<sup>1</sup> Siliconenborstprothesen zijn met verschillende beeldvormende onderzoeken te evalueren, zoals mammografie, echografie, CT en MRI.<sup>2-4</sup> MRI-onderzoek met een speciaal voor siliconenmateriaalgevoelige data-acquisitietechniek (siliconensequentie) heeft de hoogste sensitiviteit en specificiteit.<sup>2,5</sup> Gelet op de toenemende kosten in de gezondheidszorg moet worden afgevraagd of iedere patiënt die zich tot de huisarts of tweede lijn wendt met de vraag of de siliconenprothesen intact zijn, primair in aanmerking moet komen voor een MRI-onderzoek.

Aan de hand van 2 casussen willen wij in deze klinische les meer informatie geven over de diagnostische mogelijkheden en de aanvullende waarde daarvan bij onderzoek naar de integriteit van siliconenborstprothesen in situ.

**Patiënt A**, een vrouw van 41 jaar, meldt zich op de polikliniek Plastische Chirurgie vanwege ongerustheid over haar PIP-prothesen. Deze werden 13 jaar geleden achter de M. pectorales ingebracht wegens een geringe borstomvang. Zij heeft nu geen klachten en bij lichamelijk onderzoek worden er geen afwijkingen gevonden.

Aanvullend MRI-onderzoek toont links een intacte siliconenborstprothese en rechts een intra- en extracapsulaire protheseruptuur met siliconenstapeling in de lymfeklieren. Gezien de bevindingen bij het MRI-onderzoek is er een indicatie voor operatie en deze MRI-bevindingen worden peroperatief bevestigd.

**Patiënt B**, een 67-jarige vrouw, wordt via het bevolkingsonderzoek verwezen vanwege een afwijking in haar rechter borst van 'Breast imaging reporting and data system' (BI-RADS)-categorie 4 (wat betekent dat de afwijking

Jeroen Bosch Ziekenhuis, 's-Hertogenbosch.

Afd. Radiologie: drs. M.P.M. Gielens, aios radiologie;

dr. M.J.C.M. Rutten, radioloog.

Afd. Plastisch chirurgie: drs. P.G.L. Koolen, anios plastische chirurgie; drs. R.A.E.C. Hermens, plastisch chirurg.

Contactpersoon: drs. M.P.M. Gielens (m.gielens@jzb.nl).

verdacht voor een maligniteit is). Zij onderging 36 jaar geleden een borstaugmentatie met plaatsing van siliconenprothesen beiderzijds. Bij eerdere deelname aan het bevolkingsonderzoek waren geen afwijkingen geconstateerd.

Het mammogram laat een irregulair begrensde prothese beiderzijds zien met een onscherp begrensde densiteit in de axillaire uitloper rechts met een lengte van 12 mm. Bij aanvullend echografisch onderzoek kan niet met zekerheid worden gedifferentieerd tussen een borstprotheselekkage of een ruimte-innemende structuur uitgaande van het fibroglandulaire weefsel. MRI-onderzoek met intraveneus contrastmiddel toont geen afwijkingen, alleen de aanwezigheid van een lymfeklier boven de prothese van de rechter borst. MRI-opnamen die worden vervaardigd met speciale siliconengevoelige sequenties laten uitgebreide siliconendeposities zien buiten het kapsel van de prothese in de rechter M. pectoralis en in een lymfeklier rechts (figuur 1). Links is er sprake van een intracapsulaire borstprotheseruptuur.

Tijdens de operatie worden de MRI-bevindingen bevestigd. De prothesen en de lymfeklier worden verwijderd.

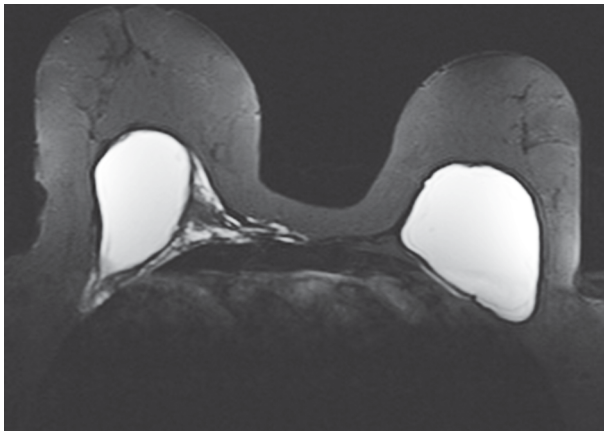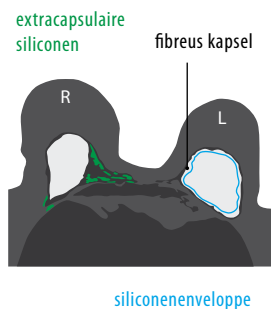

**FIGUUR 1** MRI-opname met siliconensequentie van de borsten van patiënt B. Er is een extracapsulaire ruptuur rechts met uitgebreide siliconendeposities buiten het kapsel van de prothese. Links is er een intracapsulaire borstprotheseruptuur.

Pathologisch onderzoek laat zien dat het om een siliconoom gaat, zonder tekenen van maligniteit.

## BESCHOUWING

Borstprothesen worden veelal geplaatst voor cosmetische augmentatie of voor reconstructie na mastectomie. Een onderzoek in Nederland naar het vóórkomen van lekkage van prothesen van het merk Poly Implant Prothèse (PIP) laat een prevalentie van 24% zien na 10 jaar.<sup>6</sup> Er zijn vele verschillende soorten borstprothesen beschikbaar. Globaal kunnen ze worden ingedeeld in prothesen met een vulling van siliconen, fysiologisch zout of hydrogel. De prothese wordt vóór of achter de M. pectoralis geplaatst. Na plaatsing vormt zich altijd een fibreus kapsel rondom de prothese.

Siliconenlekkage kan worden onderverdeeld in een intracapsulaire en extracapsulaire protheseruptuur. Bij een intracapsulaire ruptuur bevindt de siliconenprothese-inhoud zich macroscopisch niet buiten het fibreuze kapsel. Bij een extracapsulaire ruptuur

is de siliconeninhoud aanwezig in het omgevende weefsel buiten het fibreuze kapsel, waarbij zich siliconomen kunnen vormen. Wanneer er microscopische hoeveelheden siliconen buiten een intacte prothese worden gevonden, spreekt men van een 'gel bleed'.

Achtereenvolgens beschrijven we de aanvullende waarde van mammografie, echografie, CT en MRI bij het beoordelen van de integriteit van siliconenborstprothesen bij patiënten.

## MAMMOGRAFIE

De literatuur vermeldt een relatief lage sensitiviteit van de detectie van siliconenlekkage met mammografie: 30-68%.<sup>2,7</sup> De specificiteit bedraagt ongeveer 81%.<sup>7</sup> Gezien de hoge kans op fout-negatieve uitslagen zal dit onderzoek altijd gecombineerd worden met een echografie.

Voor de detectie van mammacarcinoom met adequaat beeldvormend onderzoek moet de CBO-richtlijn gehanteerd worden (bron: [www.oncoline.nl/mammacarcinoom](http://www.oncoline.nl/mammacarcinoom)). De aanwezigheid van mammaprothesen is geen contra-indicatie voor het verrichten van een mammografie. Tevens kan er nog een zogenaemde Eklund-opname gemaakt worden. Bij deze techniek wordt de prothese naar achteren gedrukt en kan het klierweefsel beter geëvalueerd worden. Er is geen verhoogd risico op het ontstaan van lekkage als gevolg van compressie tijdens mammografie.

**Extracapsulaire ruptuur** Een extracapsulaire siliconenruptuur kan mammografisch goed gedetecteerd worden als een radio-opake structuur buiten de prothese in het parenchym van het borstklierweefsel, langs de M. pectoralis of in een lymfeklier.

## ECHOGRAFIE

Voordelen van echografie zijn dat er geen ioniserende straling gebruikt wordt, dat het goedkoop is en dat het onderzoek goed beschikbaar is. Echografische beoordeling wordt bemoeilijkt doordat de achterwand van de prothese soms moeilijk te visualiseren is, met name bij grote implantaten. Ook kan er plooiing van de prothese zijn en kan de prothese echografische artefacten geven die moeilijk te onderscheiden zijn van lekkage, de zogenoemde reverberatie-artefacten.

De waarde van echografie hangt af van de ervaring van de radioloog. De sensitiviteit en specificiteit van echografische detectie van siliconenlekkage liggen respectievelijk rond de 77 en 69%.<sup>7</sup> De morfologie, de contour van de prothese, het parenchym en de axilla kunnen hiermee beoordeeld worden.

**Extracapsulaire ruptuur** Het betrouwbaarste echografische kenmerk van een extracapsulaire ruptuur is de aanwezigheid van siliconenmateriaal buiten de prothese (siliconoom). Dit kan in het borstklierweefsel of in de axilla voorkomen en veroorzaakt een hyperechogene reflectie met daarachter een hyperechogene schaduw, ook wel het sneeuwstormfenomeen genoemd (figuur 2).

**Intracapsulaire ruptuur** Het 'stepladder'-teken is een echografisch teken van een intracapsulaire ruptuur en komt overeen met het zogenoemde linguine-teken dat gezien wordt op de CT- en MRI-scan. Dit zijn horizontale of curvilineaire lijnen in de siliconen op de scan, die een afbeelding vormen van de gecollabeerde siliconenenveloppe; dit fenomeen is te zien in figuur 3 en in het filmpje.

## CT

CT wordt tegenwoordig weinig toegepast voor de beoordeling van de integriteit van borstprothesen vanwege de

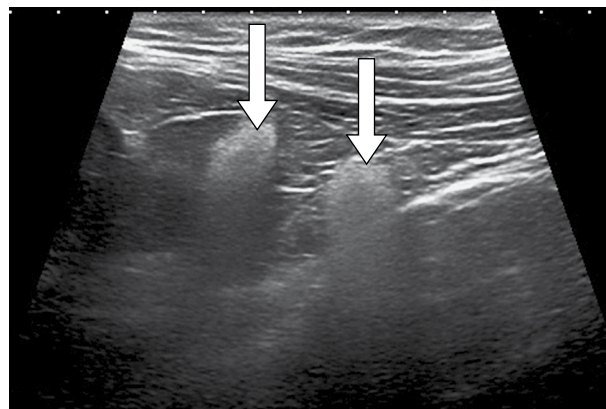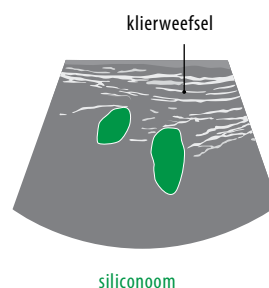

**FIGUUR 2** Echografisch beeld van siliconomen in het fibroglandulaire weefsel bij een extracapsulaire ruptuur van een siliconenborstprothese in situ. Een hyperechogene reflectie met daarachter een typische hyperechogene schaduw wordt het sneeuwstormfenomeen genoemd.

ongewenste ioniserende stralenbelasting bij een relatief jonge patiëntengroep en de potentiële initiatie van borsttumoren. CT-onderzoek is dan ook voorbehouden aan

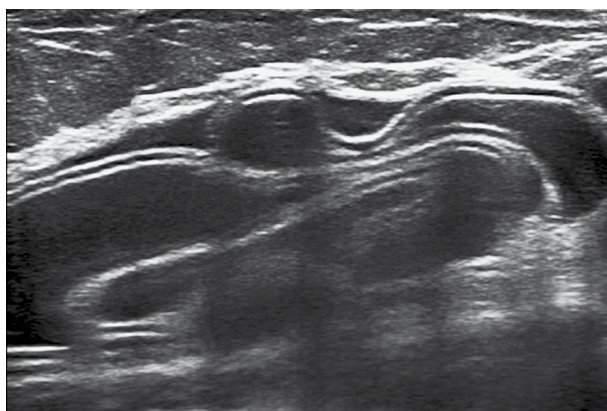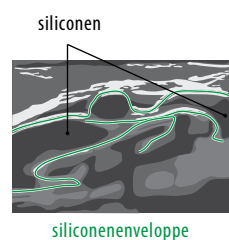

**FIGUUR 3** Echografisch beeld van een gecollabeerde siliconenenveloppe bij een intracapsulaire ruptuur van een borstprothese in situ. De aanwezigheid van horizontale of curvilineaire lijnen in de siliconen wordt het 'stepladder'-teken genoemd.

## LEERPUNTEN

- **MRI is het beste onderzoek voor het beoordelen van de integriteit van siliconenborstprothesen, vanwege de toepassing van een siliconengevoelige sequentie.**
- **Voor patiënten met PIP-prothesen die geplaatst zijn vóór 2011 is beeldvormend onderzoek niet nodig; deze prothesen worden zonder beeldvormend onderzoek operatief verwijderd.**
- **Momenteel ontbreekt een goede beslissboom voor aanvullend beeldvormend onderzoek bij patiënten met siliconenborstprothesen.**
- **Uit kostenoverweging adviseren wij MRI bij: (a) symptomatische patiënten met een dubieuze of een negatieve echografie-uitslag; en (b) asymptomatische patiënten die zich zorgen maken, met een positieve echografie-uitslag.**

patiënten bij wie een MRI-onderzoek gecontra-indiceerd is, zoals bij patiënten met een pacemaker of claustrofobie.

**Extracapsulaire ruptuur** Omdat siliconen en parenchym een hoge dichtheid hebben op een CT-scan, zijn extracapsulaire rupturen hier niet goed op te beoordelen.

**Intracapsulaire ruptuur** Met een CT-scan kan een intracapsulaire borstprotheseruptuur betrouwbaar worden afgebeeld. Hierbij komt het kapsel van de prothese als een guirlandestructuur in het siliconenmateriaal te liggen. Dit manifesteert zich dan als het linguine-teken.

#### MRI

MRI-onderzoek met siliconensequentie is de accuraatste manier voor de detectie van siliconenlekkage bij borstprothesen. De sensitiviteit bedraagt 75-90% en de specificiteit 90-97%.<sup>1,2,5,7</sup> Bij deze techniek wordt gebruikgemaakt van het vermogen om met MRI het signaal van water en vet te onderdrukken en tegelijkertijd dat van siliconen te versterken.

Het onderzoek kan met verschillende veldsterkten worden uitgevoerd. Om optimaal beeldresultaat te verkrijgen wordt bij voorkeur gebruikgemaakt van een MRI van 3 Tesla met een speciale opnamespoel voor de borst. Het MRI-protocol voor de evaluatie van siliconenborstprothesen is niet primair geschikt voor de beoordeling van het klierweefsel op tumoren, omdat er geen intraveneus contrastmiddel wordt toegediend.

Plooiing van de prothese komt veel voor en moet worden onderscheiden van lekkage. Een geringe hoeveelheid vocht juist naast de prothese is niet afwijkend en is met MRI te onderscheiden van siliconen.

**Extracapsulaire ruptuur** Een extracapsulaire ruptuur is te zien als vrije siliconen buiten het fibreuze kapsel. Op de speciale siliconensequentie hebben deze een hoog

signaal en daardoor onderscheidt dit zich van water, dat op deze sequentie een laag signaal heeft.

**Intracapsulaire ruptuur** Het bekendste teken van een intracapsulaire ruptuur is het linguine-teken, net als bij CT. De siliconen enveloppe is daarbij gelegen in het siliconemateriaal binnen het kapsel.

#### WANNEER AANVULLEND ONDERZOEK?

Sinds april 2010 verbiedt de Inspectie voor de Gezondheidszorg alle verkoop en implantaties van PIP-prothesen in Nederland. De Nederlandse Vereniging voor Plastische Chirurgie adviseert in haar recent herziene richtlijn om PIP-prothesen die geplaatst zijn vóór 2011 te vervangen, ongeacht het al dan niet intact zijn hiervan.<sup>8</sup> Dit is vanwege de significant hogere kans op scheuren van de siliconenenveloppe. Lekkage van deze industriële siliconen kan weefselirritatie geven met ontstekingsverschijnselen en pijn.<sup>6</sup> Aanvullend onderzoek is hierbij dus niet geïndiceerd.

Retrospectief was bij patiënt A aanvullend onderzoek dus overbodig geweest en hadden de prothesen direct vervangen moeten worden. Helaas kon in de klinische notities niet teruggevonden worden waarom er primair een MRI was aangevraagd. Toen patiënt A zich bij de polikliniek meldde, was de herziene richtlijn echter nog niet voorhanden.

Voor de siliconenprothesen van andere fabrikanten is MRI-onderzoek, dat bij voorkeur wordt vervaardigd met een speciale siliconengevoelige sequentie, een goede manier om lekkage op te sporen. De Amerikaanse Food and Drug Administration adviseert om patiënten met siliconenborstimplantaten te vervolgen met MRI 3 jaar na de operatie en daarna elke 2 jaar. Gezien de kosten die dit onderzoek met zich meebrengt moet echter afgevraagd worden of bij iedere patiënt primair een MRI verricht dient te worden. Vooralsnog wordt in Nederland een 1- tot 2-jaarlijkse controle geadviseerd, waarbij klachten en lichamelijk onderzoek bepalen of er verder onderzoek wordt ingezet; hierbij worden asymptomatische patiënten niet routinematig gescreend.

Er is geen wetenschappelijk getoetste richtlijn voor de juiste beslissboom voor de detectie van siliconenborstprotheserupturen die tevens het economisch aspect in ogenschouw neemt. Aan de hand van de huidige literatuur zouden wij een MRI adviseren bij: (a) symptomatische patiënten met een dubieuze of een negatieve echografie-uitslag; en (b) asymptomatische patiënten met een positieve echografie-uitslag om een onnodige operatie te voorkomen. Met asymptomatische patiënten bedoelen wij patiënten die zich zorgen maken over het intact zijn van de siliconenborstprothese zonder dat zij hiervan klachten ervaren. Deze patiënten kunnen naar onze mening in principe met de reguliere mammadiagnostiek

onderzocht worden, dus met mammo- en echografie.<sup>7,9</sup> Voor symptomatische patiënten met een positieve echo-uitslag is MRI niet nodig, omdat echografie overtuigend en voldoende is.

Tot op heden ontbreekt echter een goede beslisboom voor aanvullend beeldvormend onderzoek bij patiënten met siliconenborstprothesen. Hiervoor zouden prospectieve gerandomiseerde studies moeten plaatsvinden bij grote groepen symptomatische en asymptomatische patiënten met siliconenborstprothesen.

**Dames en Heren**, veel patiënten met siliconenborstprothesen maken zich zorgen over het intact zijn van hun prothesen. Daarom wordt vaak lichamelijk en beeldvormend onderzoek bij hen verricht. MRI met siliconensequentie is het beste onderzoek om de integriteit van sili-

conenprothesen in situ te evalueren. Wij adviseren MRI bij: (a) symptomatische patiënten met een dubieuze of een negatieve echografie-uitslag; en (b) asymptomatische patiënten die zich zorgen maken, met een positieve echografie-uitslag. Beeldvormend onderzoek is niet nodig voor patiënten met PIP-prothesen die vóór 2011 zijn geplaatst; deze prothesen worden direct chirurgisch verwijderd.

Belangenconflict en financiële ondersteuning: geen gemeld.

Aanvaard op 26 september 2013

Citeer als: Ned Tijdschr Geneeskd. 2013;157:A6412

 **KIJK OOK OP WWW.NTVG.NL/KLINISCHEPRAKTIJK**

## LITERATUUR

- Hölmich L, Fryzek JP, Kjoller, Breiting VB, Jorgensen A, Krag C, et al. The diagnosis of silicone breast-implant rupture. Clinical findings compared with findings at magnetic resonance imaging. *Ann Plast Surg.* 2005;54:583-9.
- Ikeda DM, Borofsky HB, Herfkens RJ, et al. Silicone breast implant rupture: pitfalls of magnetic resonance imaging and relative efficacies of magnetic resonance, mammography and ultrasound. *Plast Reconstr Surg.* 1999;104:2054-62.
- Stöblen F, Rezai MR, Kummel S. Imaging in patients with breast implants-results of the First International Breast (Implant) Conference 2009. *Insights Imaging.* 2010;1:93-7.
- Juanpere S, Perez E, Huc O, Motos N, Pont J, Pedraza S. Imaging of breast implants - a pictorial review. *Insights Imaging.* 2011;2:653-70.
- Hölmich L, Vejborg I, Conrad C, Sletting S, McLaughlin JK. The diagnosis of breast implant rupture: MRI findings compared with findings at explanation. *Eur J Radiol.* 2005;53:213-25.
- Maijers MC, Niessen FB. Prevalence of rupture of poly implant prothèse silicone breast implants, recalled from the European market in 2010. *Plast Reconstr Surg.* 2012;129:1372-8.
- Dii Benedetto G, Cecchini C, Grasetti L, et al. Comparative study of breast implant rupture using mammography, sonography, and magnetic resonance imaging: Correlation with surgical findings. *Breast J.* 2008;14:532-7.
- Richtlijn borstvergroting, herziene versie 1 maart 2013. Utrecht: Nederlandse Vereniging voor Plastische Chirurgie; 2013.
- Chung KC, Malay S, Shauver MJ, Kim HM. Economic analysis of screening strategies for rupture of silicone gel breast implants. *Plast Reconstr Surg.* 2012;130:225-37.
