# Supplementary material
Source: PubMed Central journal article supplement (PMC7120863)
Supplement: 978-90-368-1841-4_2_MOESM3_ESM.pdf [file 978-90-368-1841-4_2_MOESM3_ESM.pdf]

## De waarde van gefuseerde PET-CT-beelden bij 2 lymfoompatiënten met skeletlokalisaties

M.C.Geerts, H.M.E.Quarles van Ufford, M.H.H.Kramer, P.F.G.M.van Waes en J.M.H.de Klerk

Bij 2 vrouwen, van 36 en 34 jaar, met de ziekte van Hodgkin, was er bij positronemissietomografie (PET) ziekteactiviteit te zien op plaatsen waar de CT-scan geen afwijkingen toonde. Na fusie van de PET- en CT-beelden bleek het om botlokalisaties te gaan. Een CT-geleide botbiopsie bevestigde dit bij een van de patiënten. Bij beiden veranderde door de uitslag van de gefuseerde PET-CT-beelden het beleid dat zou zijn gevolgd naar aanleiding van de standaardstadiëringstechniek. Beide patiënten ondergingen radiotherapie; bij de ene patiënte waren er na 6 maanden geen afwijkingen zichtbaar, terwijl de andere overleed wegens ziekteprogressie. Het PET-CT-onderzoek kan niet alleen bij de stadiëring van lymfoom een belangrijke rol spelen, maar ook bij het starten van de therapie, als uitgangsscans, bij de evaluatie tijdens de therapie en bij het vroeg aantonen van een recidief.

Ned Tijdschr Geneeskd. 2006;150:204-9

Bij lymfoompatiënten wordt de (ziektevrije) overleving bepaald door de histologische bevindingen en de uitgebreidheid van de ziekte (tabel). Een nauwkeurige stadiëring is essentieel voor het optimaliseren van de behandeling en voor de prognose van patiënten met de ziekte van Hodgkin of een non-hodgkinlymfoom.<sup>3-5</sup> Ook de tussentijdse evaluatie van de reactie op de behandeling en de vroege detectie van een recidief spelen een cruciale rol. Stadiëring gebeurt door middel van lichamelijk onderzoek, beeldvormend onderzoek, laboratoriumdata en een beenmergbiopsie.

De beeldvorming van thorax, abdomen en kleine bekken vindt plaats door middel van een CT-scan. Deze standaarddiagnostiek kan echter tekortschieten. Zo kan het vaststellen van de extranodale lokalisaties, zoals de lever, de milt en het beenmerg, met behulp van een CT-scan lastig zijn. Positronemissietomografie (PET)-onderzoek kan in deze gevallen uitkomst bieden.<sup>6-8</sup>

Waar de CT-scan gebruikmaakt van het visualiseren van verandering van anatomische structuren, maakt het PET-onderzoek gebruik van metabole veranderingen van tumorweefsel. Het PET-onderzoek wordt gebruikt bij de diagnosestelling, de stadiëring en de follow-up van verschillende maligniteiten, onder andere niet-kleincellige longcarcinomen, lymfomen, colorectale en oesofaguscarcinomen, melanomen, carcinomen in het hoofd-halsgebied en mammacarcinomen.<sup>9</sup> Een belangrijke tracer bij dit functioneel

beeldvormend onderzoek is een radioactief analogon van glucose, het fluor-18-deoxyglucose, afgekort <sup>18</sup>F-FDG of FDG. Doordat maligne cellen meer glucose nodig hebben voor hun snelle proliferatie dan gezonde cellen, neemt actief tumorweefsel meer FDG op. Er wordt meer radioactiviteit gedetecteerd op plaatsen waar het weefsel metabool actief is, de zogenaamde hotspot op de PET-scan. FDG wordt niet specifiek door maligne cellen opgenomen, ook inflammatoir weefsel heeft een verhoogde glucose- en dus FDG-opname. Dit is dan ook de meest voorkomende oorzaak van een fout-positieve FDG-stapeling. Verder is er de fysiologische opname van FDG in actief spierweefsel, maag-darmstelsel en nieren, en ureters en blaas, waarmee bij de beoordeling van het PET-onderzoek rekening gehouden moet worden.

De precieze lokalisatie van een afwijking met verhoogde FDG-opname kan op een PET-scan lastig zijn. Door de PET- en CT-beelden met elkaar te fuseren, kunnen de 2 methoden elkaar aanvullen. Het belang van PET-beelden gefuseerd met CT-beelden wordt geïllustreerd aan de hand van de volgende 2 ziektegeschiedenissen.

### ZIEKTEGESCHIEDENIS

Patiënt A, een 36-jarige vrouw, werd behandeld wegens de ziekte van Hodgkin (nodulair scleroserend type) met lokaliserings suprasternaal en rechts supraclaviculair en in de hals (stadium IIA). Na de eerste 4 chemokuren werd de behandeling geëvalueerd op basis van een CT-scan. Deze scan toonde de progressie van de ziekte en er werd overgegaan op een ander type chemokuur. Acht maanden later rondde patiënte deze chemokuur af en werd er naast een CT-scan ook een PET-scan gemaakt. De PET-scan toonde geen pathologische FDG-opname. Er werd een complete remissie geconsta-

Meander Medisch Centrum, locatie Lichtenberg, Postbus 1502, 3800 BM Amersfoort.

Afd. Inwendige Geneeskunde: mw.M.C.Geerts, coassistent; hr.dr.M.H.H.Kramer, internist-hematoloog.

Afd. Radiologie en Nucleaire Geneeskunde: mw.H.M.E.Quarles van Ufford, assistent-geneeskundige; hr.prof.dr.P.F.G.M.van Waes, radio- loog; hr.dr.J.M.H.de Klerk, nucleair geneeskundige.

Correspondentieadres: hr.dr.J.M.H.de Klerk (j.deklerk@meandermc.nl).

Stadiëring van de ziekte van Hodgkin en non-hodgkinlymfomen volgens Ann-Arbor<sup>1</sup> en Cotswolds<sup>2\*</sup>

| stadium | kenmerk                                                                                                                                                                                                                                                                                                                                                                                                                                          |
|---------|--------------------------------------------------------------------------------------------------------------------------------------------------------------------------------------------------------------------------------------------------------------------------------------------------------------------------------------------------------------------------------------------------------------------------------------------------|
| I       | betrokkenheid van een lymfeklierstation of lymfoïde structuur (bijvoorbeeld milt, ring van Waldeyer), zonder of met (stadium IE) doorgroei naar een naburig orgaan                                                                                                                                                                                                                                                                               |
| II      | betrokkenheid van $\geq 2$ lymfeklierstations aan dezelfde zijde van het diafragma; het aantal aangetaste stations moet aangeduid worden, bijvoorbeeld met 'II <sub>3</sub> '; dit kan gepaard gaan met doorgroei in een naburig orgaan (stadium IIE)                                                                                                                                                                                            |
| III     | betrokkenheid van lymfeklierstations aan beide kanten van het diafragma:<br>IIIa <sub>1</sub> : met aantasting van lymfeklieren in de bovenste buikhelft (lymfadenopathie in milthilus, coeliakale of portale klieren)<br>IIIa <sub>2</sub> : met aantasting van lymfeklieren in de onderste buikhelft (para-aortale, iliacale of mesenteriale lymfadenopathie)<br>IIIe: met doorgroei in een naburig orgaan<br>IIIs: met aantasting van de milt |
| IV      | gedissemineerde ziekte van Hodgkin, of multifocale aantasting van $\geq 1$ extralymfatisch orgaan met of zonder aantasting van een gerelateerde lymfeklier, of geïsoleerde aantasting van een extralymfatisch orgaan met aangetaste lymfeklierstations op afstand                                                                                                                                                                                |

\*Per stadium kan een letter worden toegevoegd: A voor 'geen symptomen', B voor 'aanwezigheid van koorts  $> 38^{\circ}\text{C}$  gedurende  $> 1$  week, gewichtsverlies  $> 10\%$  in 6 maanden tijd, of overmatig nachtzweeten' (jeuk wordt niet als B-symptoom gezien) en E voor 'betrokkenheid van een enkel extranodaal orgaan, grenzend aan of dicht bij een aangetast lymfeklierstation (zoals ingroei in een orgaan vanuit een aangetast lymfeklierstation, bijvoorbeeld in de long vanuit mediastinale of hilare lymfadenopathie)'.

teerd. In de drie maanden hierna onderging patiënte radiotherapie op alleen de aangedane klierstations ('involved field') en bleef er sprake van complete remissie. Vijf maanden na het beëindigen van de radiotherapie kreeg patiënte pijnklachten in haar onderrug. Op verzoek van de behandelend internist werd een opnieuw een PET-scan gemaakt, met als doelstelling: 'lokalisatie van een eventueel recidief'. Op deze PET-scan waren plaatsen met toegenomen FDG-opname, mogelijk tumorlokalisaties, te zien ter hoogte van LI, LII en het rechter sacro-iliacale gewricht. Opnieuw onderging patiënte chemotherapie, gevolgd door een autologe stamceltransplantatie. Er werd wederom een complete remissie bereikt. Een follow-up-PET-scan die 4 maanden later gemaakt werd, toonde echter opnieuw ziekteactiviteit. Dit keer ter plaatse van LII-III en opnieuw het rechter sacro-iliacale gewricht (figuur 1). Op de CT-scan werden beide afwijkingen niet gezien; ook niet met de kennis van de resultaten van de PET-scan. Om zekerheid te verkrijgen betref-

fende de aard van de hotspot werd een biopst aangevraagd. Met behulp van de gefuseerde PET- en CT-beelden van het rechter sacro-iliacale gewricht werd een CT-geleid botbiopst genomen (figuur 2). De biopsten bevestigden de diagnose 'lymfoom'. Patiënte onderging daarop opnieuw radiotherapie op de aangedane skeletlokalisaties. Een follow-up-PET-scan na 6 maanden toonde geen afwijkingen meer.

Patiënt B, een 34-jarige vrouw, werd behandeld met 8 kuren met doxorubicine, bleomycine, vinblastine en dacarbazine (ABVD-schema) wegens de ziekte van Hodgkin, nodulair scleroserend type (stadium IVB: op CT-scan lymfadenopathie boven en onder het diafragma; tevens werd een botafwijking in het rechter os ilium beschreven). De CT-scans die vervolgens gemaakt werden, voor de follow-up van de lymfadenopathie onder chemotherapie, gaven geen zekerheid wat betreft de botlokalisatie. De pathologische massa in het mediastinum nam in eerste instantie in grootte af, maar was nadat de patiënt alle 8 ABVD-kuren had ondergaan aanzienlijk in grootte toegenomen. In het abdomen was geen lymfadenopathie meer te zien. Gezien de progressie van de ziekte werd gestart met 2e-lijns-chemotherapie om die uiteindelijk te laten volgen door hogedosis-chemotherapie ('beam-conditioning') en een autologe stamceltransplantatie. Ter evaluatie werd opnieuw een CT-scan vervaardigd waarop mogelijk enige afname van de grootte van de mediastinale lymfoommasse te zien was. Aangezien deze partiële remissie niet overtuigend was, werd om zekerheid te krijgen, ook wat betreft de eventuele botlokalisatie, een PET-scan gemaakt. Er werden op de PET-scan in de regio van het kleine bekken wél afwijkingen gezien. Na fusie van PET- en CT-beelden bleken de afwijkingen in het kleine bekken niet alleen te berusten op een lymfeklierlokalisatie dicht tegen de wervelkolom aan, maar was er ook tumoractiviteit te zien op meerdere plaatsen in het skelet (figuur 3). De geplande stamceltransplantatie na hogedosis-chemotherapie vond om deze reden geen doorgang. Patiënte werd behandeld met radiotherapie op de aangedane lokalisaties. Zij overleed wegens ziekteprogressie.

## BESCHOUWING

Van alle nieuw gediagnosticeerde patiënten met de ziekte van Hodgkin worden bij 10% beenmerg-, bij 3% lever- en bij 23% miltlokalisaties vastgesteld. Voor nieuw gediagnosticeerde patiënten met non-hodgkinlymfoom worden bij 25% beenmerglokalisaties, bij 15% leverlokalisaties en bij 22% miltlokalisaties bepaald.<sup>10</sup> Nauwkeurige stadiëring heeft minimalisering tot gevolg van de toxische therapieën, zoals radiotherapie van de klinisch aangedane gebieden plus gebieden daaromheen ('extended-field') of agressieve chemotherapie, resulterend in afname van het risico op secundaire maligniteiten (het toegenomen risico op een secundaire

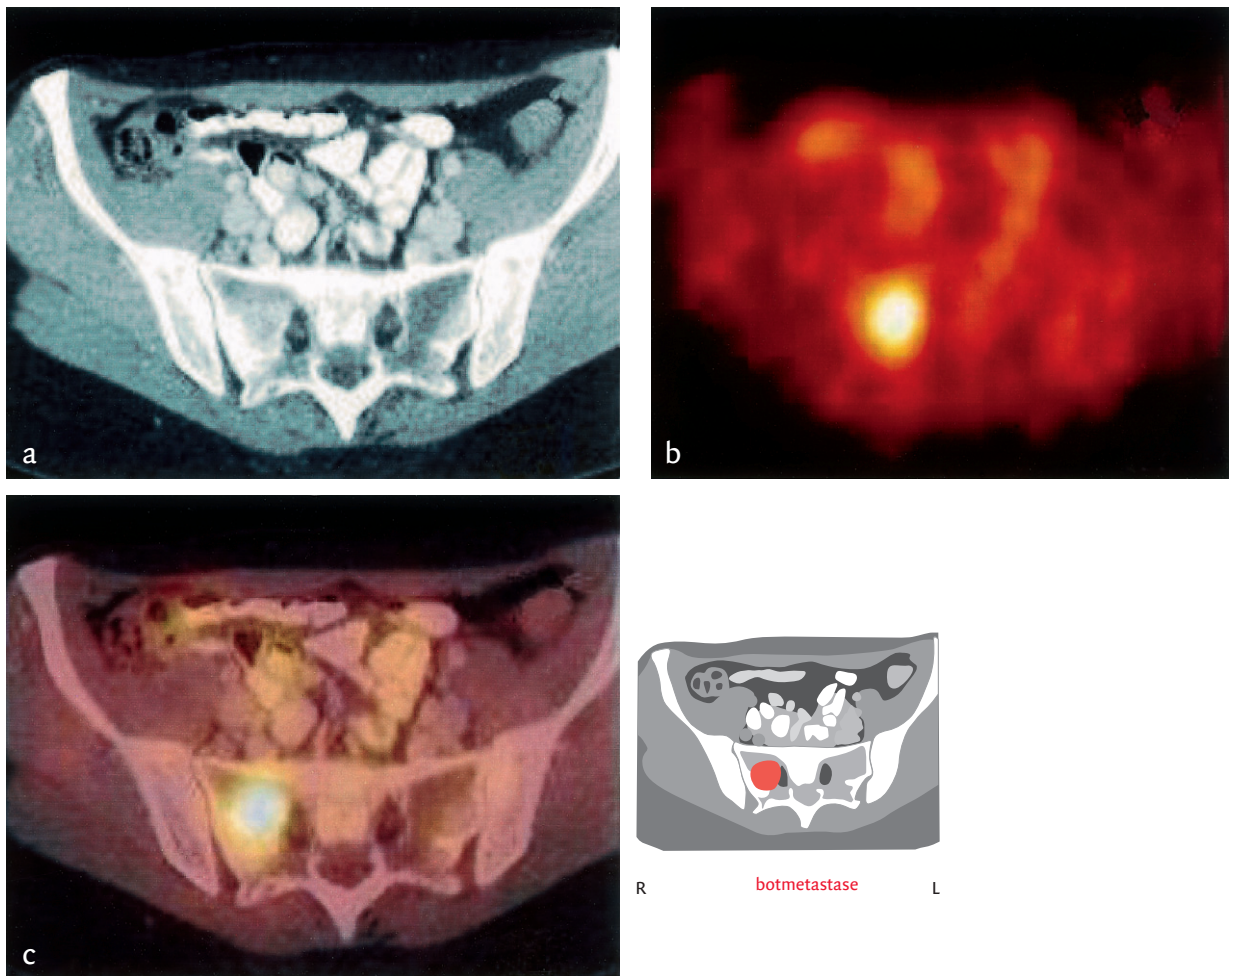

FIGUUR 1. Transversale coupes bij (a) CT, (b) positronemissietomografie (PET) en (c) PET-CT na softwarefusie bij patiënt A, die behandeld werd wegens de ziekte van Hodgkin en bij wie op de PET opnieuw ziekteactiviteit zichtbaar is. Op de PET-scan is er pathologische opname van fluor-18-deoxyglucose ter plaatse van het sacrum, terwijl deze afwijking op de CT niet is te zien.

maligniteit bij patiënten met de ziekte van Hodgkin die een gecombineerde radio- en chemotherapie hebben ondergaan, bedraagt na 15 jaar 2,3% en na 20 jaar 4% per persoon per jaar).<sup>11</sup>

De ziektegeschiedenissen van patiënt A en B illustreren dat het vastleggen van extranodale lokalisaties op CT lastig kan zijn. Bevindingen bij PET-onderzoek kunnen dan vaak helpen het inzicht in het ziektestadium te vergroten, waarmee de therapie kan worden aangepast.<sup>7-8</sup> Patiënt A kon gerichte radiotherapie ondergaan op de aangedane lokalisaties, die door het PET-onderzoek vastgesteld werden. Dit zou op basis van de uitslag van de CT-scan niet gebeurd zijn. Bij patiënt B heeft de PET-scan uiteindelijk zekerheid gegeven over de tumoractiviteit in het skelet. Dit gaf de doorslag voor het te voeren beleid, aangezien er op de CT-scan mogelijk een partiële remissie was van de mediastinale lymf-

adenopathie na hogedosis-chemotherapie. Op grond van de tumorpositieve botafwijkingen werd afgezien van stamceltransplantatie na hogedosis-chemotherapie.

Het tekortschieten van de sensitiviteit en specificiteit bij CT in vergelijking met PET heeft ook te maken met de definitie van een lymfeklierlokalisatie. De gebruikelijke definitie is gebaseerd op de vorm en de grootte van een lymfeklier: een lymfeklier met een korte as die groter is dan 1 cm bij het CT-onderzoek, wordt beschouwd als vermoedelijk maligne.<sup>12-13</sup> Een lymfeklier kleiner dan 1 cm op de CT-scan (die wel actieve tumorcellen kan bevatten) is daardoor anatomisch niet verdacht voor een lymfeklierlokalisatie, maar kan wel PET-positief zijn. Omgekeerd kan inflammatoire lymfadenopathie gemisinterpreteerd worden als lymfoom. Deze situaties kunnen leiden tot foutieve onder- of oversta-diëring. Voor wat betreft de detectie van ossale afwijkingen

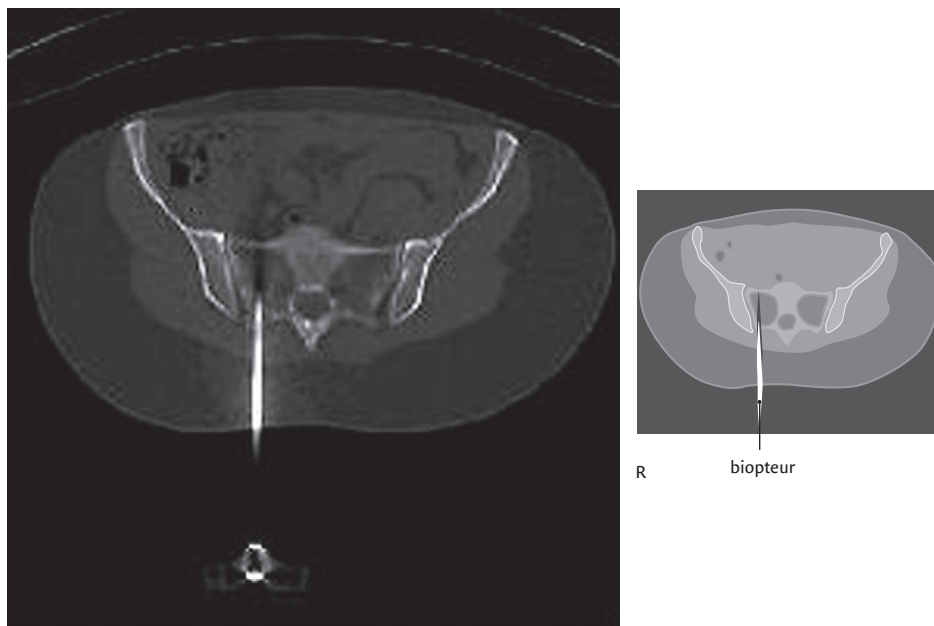

FIGUUR 2. Patiënt A ondergaat CT-geleid een botbiopsie in het sacrum ter plaatse van de hotspot gezien op de positronemissietomografie (PET)-scan. Histologisch onderzoek van het biot bevestigde de diagnose 'lymfoom'.

is het FDG-PET-onderzoek sensitiever dan het skeletscintigram.<sup>14</sup> Bovendien detecteert het skeletscintigram pas een afwijking op het moment dat er osteoblastenactiviteit is, dus niet bij de primaire beenmerglokalisatie van lymfomen.

Door de ontwikkeling van de softwarefusie en de geïntegreerde PET-CT-scanners is er de mogelijkheid om PET- en CT-onderzoeken gefuseerd te beoordelen. Dit verschaft de kliniek beelden waarmee de precieze anatomische locatie van hypermetabole afwijkingen, zoals lymfomen bij patiënt A en B, aan te wijzen is. Ook is het met behulp van de gefuseerde PET-CT-beelden, waardoor de precieze anatomische lokalisatie van de FDG-stapeling bepaald kan worden, mogelijk om materiaal voor histologisch onderzoek te verkrijgen, zoals bij patiënt A. De coregistratie van de PET- en CT-beelden gebeurt in onze kliniek met behulp van een softwareprogramma (e.soft@leonardo; uitgave: 3.5, Siemens). De datasets van beide onderzoeken worden in de computer, die uitgerust is met de benodigde software, geladen en automatisch gefuseerd op basis van rigide transformatie.

Een uitgangs-PET-scan (vóór aanvang van de therapie) kan niet alleen voor de nauwkeurige stadiëring van belang zijn, maar kan ook bij follow-up waarde hebben. Er kan nauwkeuriger bepaald worden of de oorspronkelijke afwijkingen verdwenen zijn en tevens kunnen ogenschijnlijk nieuwe afwijkingen, die vaak blijken te berusten op ontsteking, beter onderscheiden worden. Bij 85% van de patiënten met de ziekte van Hodgkin en bij 40% van de patiënten

met een non-hodgkinlymfoom is na therapie residumassa zichtbaar op de CT-scan, hetgeen een ander dilemma oplevert.<sup>15</sup> Deze massa is meestal necrotisch en fibrotisch, maar kan ook nog tumorweefsel bevatten dat, wanneer het onopgemerkt blijft, kan leiden tot recidieven, wat behandeling noodzakelijk maakt.

Het onderscheid tussen restweefsel en actief tumorweefsel is alleen op basis van het CT-onderzoek niet te maken.<sup>16-17</sup> Voor deze differentiatie kan het gallium-67-'single photon emission computed tomography' (SPECT)-onderzoek gebruikt worden. Het FDG-PET-onderzoek heeft op dit gebied echter duidelijke voordelen. Er zijn immers een hogere resolutie en sensitiviteit, een betere beoordeling van het abdomen en een kortere tijdsduur tussen toediening van het radiofarmacon en het scannen (1 uur voor PET versus 72 uur voor <sup>67</sup>Ga-SPECT).<sup>18</sup> Ook specifiek voor de stadiëring van lymfomen en voor de evaluatie van chemotherapie heeft het FDG-PET-onderzoek een hogere sensitiviteit.<sup>18-20</sup>

De PET-scan heeft in de evaluatiefase ook prognostische waarde. De progressievrije kortetermijnoverleving bij patiënten met restweefsel en een negatieve PET-scan is meer dan 90%. Terwijl voor patiënten met een positieve PET-scan een progressievrije overleving geldt van 0-40%.<sup>21</sup>

Tot slot kan het FDG-PET-onderzoek ook zijn waarde hebben bij het aantonen van een recidief. Bij klinische aanwijzingen voor een recidief, bijvoorbeeld bij patiënten met persisterende of nieuwe klachten van algehele malaise en/of B-symptomen of in het algemeen bij oplopende tumor-

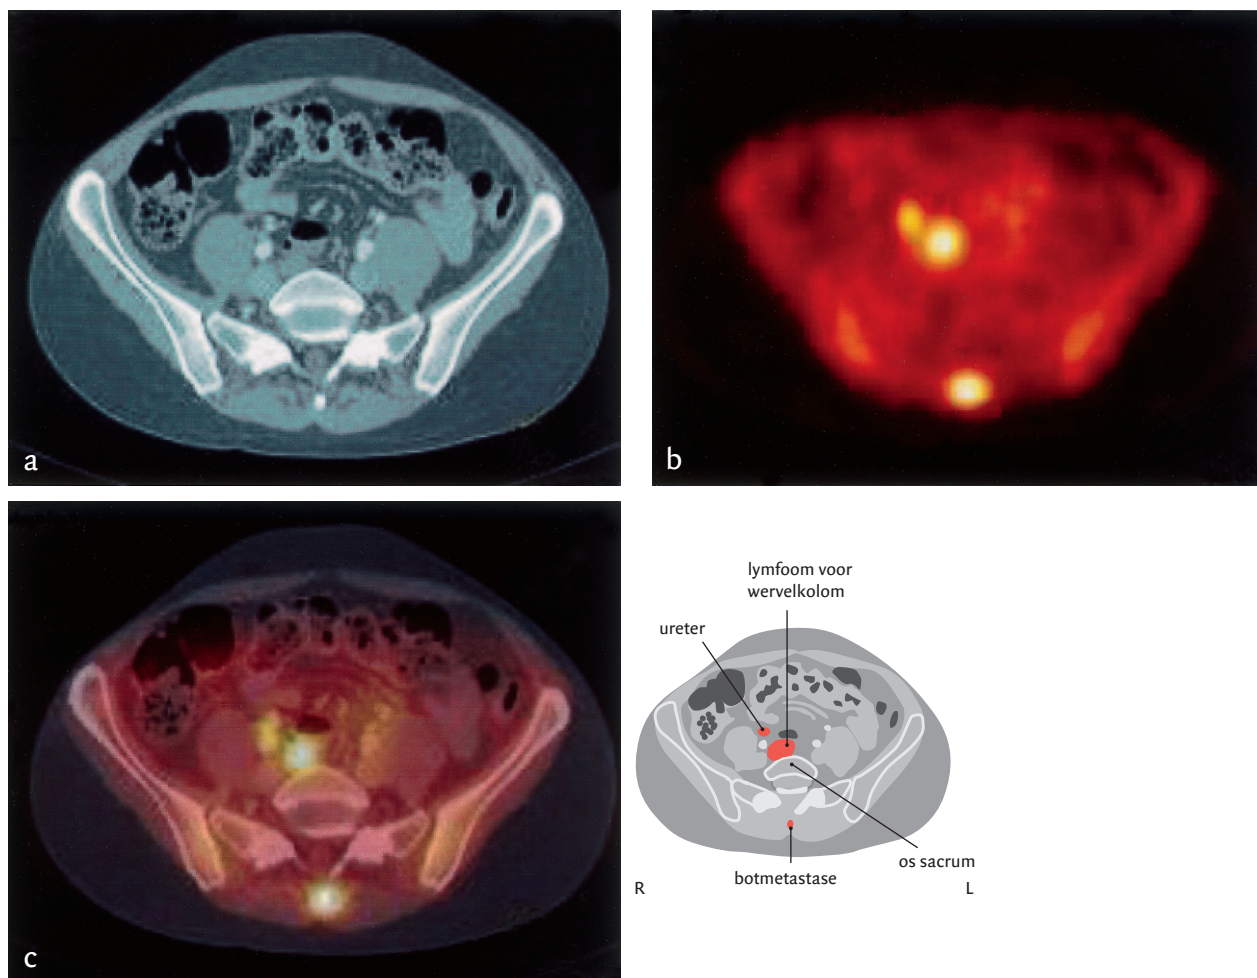

FIGUUR 3. Transversale coupes bij (a) CT, (b) positronemissietomografie (PET) en (c) PET-CT na softwarefusie bij patiënt B, gemaakt ter beoordeling van de respons op chemotherapie. Het PET-onderzoek toont een toename van het aantal hotspots in het kleine bekken ten opzichte van eerdere beelden. De fusiebeelden laten zien dat er ook een botlokalisatie is.

markerconcentraties, kan een FDG-PET-scan uitkomst bieden. Bij negatieve uitslagen van andere beeldvormende diagnostiek kan de FDG-PET-scan wel een recidief aantonen.<sup>22</sup>

#### CONCLUSIE

De PET-scan kan van groot belang zijn bij de optimale begeleiding van en de therapiekeuze voor patiënten met lymfomen. Deze conclusie geldt zowel voor de primaire diagnostiek, de stadiëring, de re-stadiëring en de evaluatie van de therapierespons als voor de tijdige opsporing van recidieven. De fusie van het PET- en CT-onderzoek, waarbij metabole en anatomische informatie samengevoegd wordt, kan leiden tot meer verfijnde en nauwkeurigere (re)stadiëring, met een betere afstemming van de therapie tot gevolg. Een

tweede voordeel van de gefuseerde PET-CT-beelden is het verkrijgen van materiaal voor histologisch onderzoek uit lokalisaties die op de CT-scan niet of nauwelijks te zien zijn. Met de kennis van de lokalisatie door middel van het PET-onderzoek kan er CT- of echogeleid weefsel verkregen worden. Het PET-onderzoek en de combinatie van PET- en het CT-onderzoek krijgen als beeldvormende technieken voor de evaluatie van de ziekte van Hodgkin en van non-hodgkinlymfom een steeds grotere rol.

Belangenconflict: geen gemeld. Financiële ondersteuning: geen gemeld.

Aanvaard op 19 oktober 2005

---

## Literatuur

- 1 Carbone PP, Kaplan HS, Musshoff K, Smithers DW, Tubiana M. Report of the Committee on Hodgkin's Disease Staging Classification. *Cancer Res.* 1971;31:1860-1.
- 2 Lister TA, Crowther D. Staging for Hodgkin's disease. *Semin Oncol.* 1990;17:696-703.
- 3 Armitage JO. Treatment of non Hodgkin's lymphoma. *N Engl J Med.* 1993;328:1023-30.
- 4 Canellos GP. Current strategies for early Hodgkin's disease. *Ann Oncol.* 1996;7:91-3.
- 5 Sandrasegaran K, Robinson PJ, Selby P. Staging of lymphoma in adults. *Clin Radiol.* 1994;49:149-61.
- 6 Bangerter M, Moog F, Buchmann I, Kotzerke J, Griesshammer M, Hafner M, et al. Whole-body 2-[18F]-fluoro-2-deoxy-D-glucose positron emission tomography (FDG-PET) for accurate staging of Hodgkin's disease. *Ann Oncol.* 1998;9:1117-22.
- 7 Moog F, Bangerter M, Diederichs CG, Guhlmann A, Kotzerke J, Merkle E, et al. Lymphoma: role of whole-body 2-deoxy-2-[F-18] fluoro-D-glucose (FDG) PET in nodal staging. *Radiology.* 1997;203:795-800.
- 8 Buchmann I, Reinhardt M, Elsner K, Bunjes D, Althoefer C, Finke J, et al. 2-(fluorine-18)fluoro-2-deoxy-D-glucose positron emission tomography in the detection and staging of malignant lymphoma. A bicenter trial. *Cancer.* 2001;91:889-99.
- 9 Kapoor V, McCook BM, Torok FS. An introduction to PET-CT imaging. *Radiographics.* 2004;24:523-43.
- 10 Moog F, Bangerter M, Diederichs CG, Guhlmann A, Merkle E, Frickhoven N, et al. Extranodal malignant lymphoma: detection with FDG PET versus CT. *Radiology.* 1998;206:475-81.
- 11 Ng AK, Bernardo MV, Weller E, Backstrand K, Silver B, Marcus KC, et al. Second malignancy after Hodgkin disease treated with radiation therapy with or without chemotherapy: long-term risk and risk factors. *Blood.* 2002;100:1989-96.
- 12 Weihrauch MR, Re D, Bischoff S, Dietlein M, Scheidhauer K, Krug B, et al. Whole-body positron emission tomography using 18F-fluoro-deoxyglucose for initial staging of patients with Hodgkin's disease. *Ann Hematol.* 2002;81:20-5.
- 13 Sasaki M, Kuwabara Y, Koga H, Nakagawa M, Chen T, Kaneko K. Clinical impact of whole body FDG-PET on the staging and therapeutic decision making for malignant lymphoma. *Ann Nucl Med.* 2002;16:337-45.
- 14 Paul R. Comparison of fluorine-18-2-fluorodeoxyglucose and gallium-67 citrate imaging for detection of lymphoma. *J Nucl Med.* 1987;28:288-92.
- 15 Rankin SC. Assessment of response to therapy using conventional imaging. *Eur J Nucl Med Mol Imaging.* 2003;30 Suppl 1:S56-64.
- 16 Surbone A, Longo DL, DeVita jr VT, Ihde DC, Duffey PL, Jaffe ES, et al. Residual abdominal masses in aggressive non-Hodgkin's lymphoma after combination chemotherapy: significance and management. *J Clin Oncol.* 1988;6:1832-7.
- 17 Reske SN. PET and restaging of malignant lymphoma including residual masses and relapse. *Eur J Nucl Med Mol Imaging.* 2003;30 Suppl 1:S89-96.
- 18 Zijlstra JM, Hoekstra OS, Raijmakers PG, Comans EF, Hoeve JJ van der, Teule GJ, et al. 18FDG positron emission tomography versus 67Ga scintigraphy as prognostic test during chemotherapy for non-Hodgkin's lymphoma. *Br J Haematol.* 2003;123:454-62.
- 19 Kostakoglu L, Leonard JP, Kuji I, Coleman M, Vallabhajosula S, Goldsmith SJ. Comparison of fluorine-18 fluorodeoxyglucose positron emission tomography and Ga-67 scintigraphy in evaluation of lymphoma. *Cancer.* 2002;15:94:879-88.
- 20 Schirmermeister H, Guhlmann A, Elsner K, Kotzerke J, Glatting G, Rentschler M, et al. Sensitivity in detecting osseous lesions depends on anatomic localization: planar bone scintigraphy versus 18F PET. *J Nucl Med.* 1999;40:1623-9.
- 21 Spaepen K, Stroobants S, Verhoef G, Mortelmans L. Positron emission tomography with [(18)F]FDG for therapy response monitoring in lymphoma patients. *Eur J Nucl Med Mol Imaging.* 2003;30 Suppl 1: S97-105.
- 22 Comans EF, Hoekstra OS, Hoekman K, Hoeven JJ van der, Golding RP, Teule GJ. Meerwaarde van positronemissietomografie met als tracer fluor-18-deoxyglucose (FDG-PET) bij klinische probleemgevallen in de oncologie. *Ned Tijdschr Geneesk.* 2000;144:1520-8.

---

## Abstract

**The value of integrated PET-CT images in 2 lymphoma patients with skeletal localisations.** – In two women with Hodgkin's disease, 36 and 34 years of age, the PET-scan showed increased FDG-uptake in regions where the CT-scan did not reveal any abnormalities. Integration of the PET-CT images visualised bone marrow localisations in both patients. One patient underwent a CT-guided bone biopsy that confirmed this localisation. In both cases, the results of the integrated PET-CT images altered the therapy that would have been given on the basis of the standard staging technique. Both patients underwent radiotherapy. After 6 months, one patient had no visible lesions. The other patient died due to progression of the disease. Integrated PET-CT images can play an important role, not only in the precise classification and staging of lymphoma but also at the start of therapy, as an initial scan, in the evaluation of the response to treatment, and in the early detection of recurrence. *Ned Tijdschr Geneesk.* 2006;150:204-9
