# Supplementary material
Source: PubMed Central journal article supplement (PMC7120863)
Supplement: 978-90-368-1841-4_2_MOESM5_ESM.pdf [file 978-90-368-1841-4_2_MOESM5_ESM.pdf]

## Persisterend renaal bloedverlies behandeld door selectieve vasculaire embolisatie, met behoud van nierfunctie

R.LAZAROV, G.A.P.DE KORT EN R.J.A.VAN MOORSELAAR

Meer dan 70% van de renovasculaire afwijkingen die een bloeding veroorzaken, geneest spontaan en meer dan 90% kan conservatief behandeld worden, waarbij soms bloedtransfusies noodzakelijk zijn.<sup>1,2</sup> Echter, bij 4 tot 9% van de letsels is er persisterend bloedverlies, hetgeen tot (levensbedreigende) complicaties kan leiden, zoals shock, acuut massaal nierfunctieverlies als gevolg van nierischemie, perinefritisch abces of sepsis op basis van een geïnfecteerd hematoom, en, op langere termijn, hypertensie.<sup>2,3</sup>

Aanhoudend bloedverlies kan chirurgisch ingrijpen noodzakelijk maken met ligering van de bloedende nierarterie of (partiële) nefrectomie. Dit zijn relatief grote chirurgische ingrepen die belastend zijn voor de patiënt en die bovendien tot gevolg hebben dat een aanzienlijk deel van het nierparenchym blijvend verloren gaat. Selectieve embolisatie van het vaatletsel sluit de bloedingsbron af en voorkomt recidiefbloedingen.<sup>4</sup> Deze ingreep is een relatief nieuwe, minimaal invasieve behandeling voor nierbloedingen, die nauwelijks belastend is voor de patiënt. Bovendien gaat hij gepaard met minimaal parenchymverlies, zodat de nierfunctie behouden kan blijven.<sup>1,4</sup> Het succespercentage van deze embolisatie is, afhankelijk van de oorzaak van de bloeding, meer dan 80%.<sup>1,3</sup> Wij willen aan de hand van 3 verschillende ziektegeschiedenissen illustreren dat selectieve embolisatie een effectieve behandeling kan zijn bij patiënten met een persisterende nierbloeding.

### ZIEKTEGESCHIEDENISSEN

Patiënt A, een 42-jarige vrouw, onderging elders een percutane nefrolithotripsie voor een concrement in het pyelum en in een onderpoolkelk van de linker nier. Drie dagen na het verwijderen van de nefrostomiekatheter kreeg patiënte macroscopische hematurie. Bij heropname in het verwijzend ziekenhuis werd gestart met blaasspoelingen ter voorkoming van een blaasretentie door bloedstolsels. Daar de hemoglobine (Hb)-concentratie naar 4,5 mmol/l was gedaald, kreeg patiënte bloedtransfusies. Wegens persisterende macroscopische hematurie werd zij dezelfde dag naar ons ziekenhuis overgeplaatst.

Bij onderzoek zagen wij een bleke, adequaat reagerende vrouw met een bloeddruk van 110/70 mmHg en een polsfrequentie van 83/min. Patiënte had een pijnlijke linker nierloge

### SAMENVATTING

Bij 3 patiënten met persisterend bloedverlies uit bloedende of abnormale vaten van de nier werd de nierfunctie behouden door behandeling met selectieve embolisatie. De eerste patiënt, een 42-jarige vrouw, had persisterende hematurie na het ondergaan van percutane nefrolithotripsie aan de linker zijde. Omdat conservatieve therapie faalde en een nierarteriebloeding als gevolg van de lithotripsie vermoed werd, werd op basis van angiografisch onderzoek embolisatie met microcoils verricht van een segmentale onderpoolarterie. De tweede patiënt, een 40-jarige man met een ernstige vorm van hemofilie A, had sinds een aantal maanden recidiverende macroscopische hematurie. CT liet een arterioveneuze malformatie in de rechter nier zien. Angiografie gecombineerd met embolisatie met twee loslaatbare ballonnen resulteerde in occlusie van de malformatie. De derde patiënt, een 23-jarige vrouw met tubereuze sclerose, presenteerde zich met pijnklachten links onder in de buik, hematurie en dalende hemoglobinewaarde. CT liet een 10 cm groot angiomyolipoom zien met daarin een groot hematoom. Drie pathologische takken afkomstig van de bovenpoolnierarterie werden geëmboliseerd met Gianturco-coils. Na een follow-up van respectievelijk 2, 2,5 en 2,5 jaar was geen recidiefbloeding opgetreden. Selectieve embolisatie kan een uitkomst bieden bij patiënten met persisterende nierbloedingen bij wie conservatieve therapie faalt. Selectieve embolisatie is minimaal invasief en heeft als belangrijk voordeel het behoud van de nierfunctie.

met slagpijn. Laboratoriumonderzoek toonde: Hb: 3,7 mmol/l (normaal: 7,5-10,0); hematocriet (Ht): 0,17 (normaal: 0,36-0,47); creatinine: 71 µmol/l (normaal: 40-80). Omdat een nierarteriebloeding vermoed werd ten gevolge van de nefrolithotripsie, werd acuut een angiografisch onderzoek met embolisatie uitgevoerd. Na een Seldinger-punctie in de linker lies werd selectief de A. renalis sinistra met een zogenaamde cobra-katheter aangehaakt. De overzichtsonopname toonde een abrupte circulatiestop in een segmentale tak van de onderpool van de linker nier. Vervolgens werd de cobra-katheter 'superselectief' proximaal in deze segmentarterie geplaatst, die bij het opspuiten een duidelijke extravasatie liet zien (figuur 1a). Daaropvolgend werd een embolisatie uitgevoerd met behulp van 3 microcoils. Op de controleopname was het bloedende vat afgesloten en het toonde geen extravasatie meer (zie figuur 1b). Na correctie van de Hb-waarde met meerdere transfusies stabiliseerde deze zich bij 6,1 mmol/l. Het creatinineniveau was stabiel (63 µmol/l). Zes dagen na de embolisatie kon patiënte in goede conditie naar huis worden ontslagen.

Patiënt B, een man van 40 jaar, bekend wegens een ernstige vorm van hemofilie A (factor-VIII-stollingsactiviteit < 1% (normaal: 70-150)), werd door de hematoloog verwezen in verband met recidiverende macroscopische hematurie. De voor-

Universitair Medisch Centrum, Heidelberglaan 100, 3584 CX Utrecht.  
Afd. Urologie: R.Lazarov, assistent-geneeskundige; dr.R.J.A.van Moorselaar, uroloog.  
Afd. Radiologie: G.A.P.de Kort, radioloog.  
Correspondentieadres: dr.R.J.A.van Moorselaar (r.j.a.vanmoorselaar@chir.azu.nl).

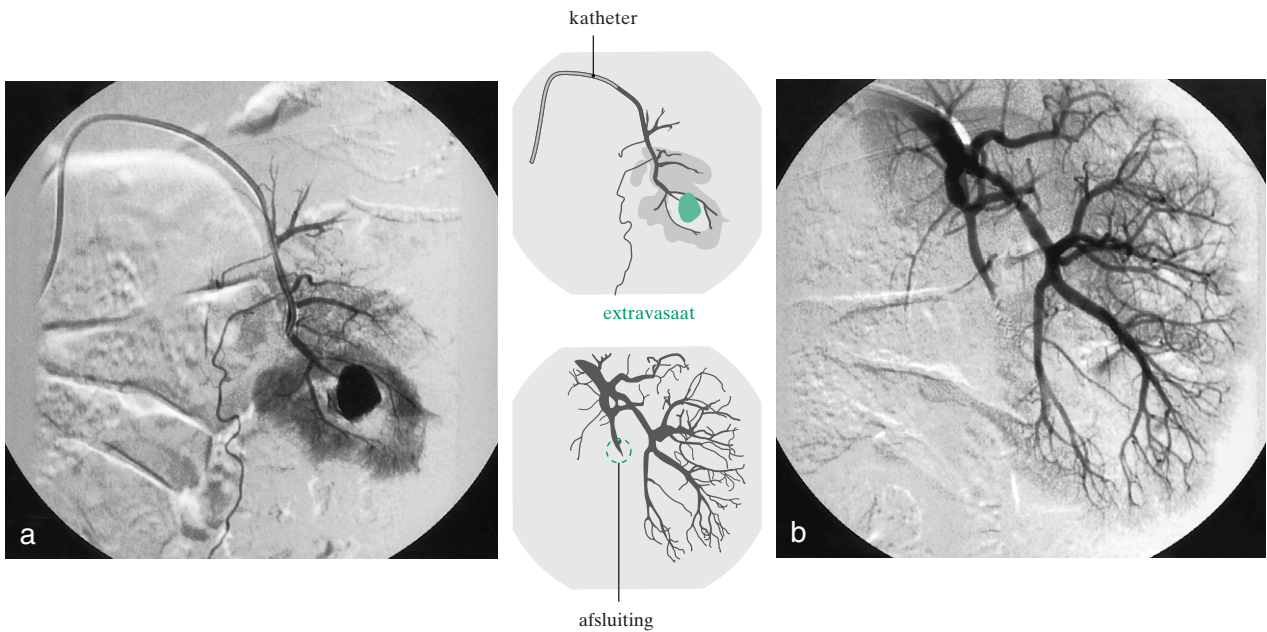

FIGUUR 1. Angiogram van patiënt A: (a) een cobrakatheter is 'superselectief' geplaatst proximaal in een segmentale onderpoolarterie van de linker nier, waarbij extravasatie van contrastvloeistof zichtbaar is, als teken van een bloeding; (b) een overzichtsoptname laat zien dat na embolisatie van de arterie met microcoils de bloedende segmentarterie afgesloten is, en er geen extravasatie meer zichtbaar is.

geschiedenis was blanco. In verband met zijn hemofilie A werd patiënt 3 keer per week profylactisch behandeld met factor-VIII-preparaat 1000 IE. Met deze profylaxe was de bloeding-frequentie acceptabel. Echter, nu had patiënt 3 maal binnen een aantal maanden een periode van ernstige macroscopische hematurie doorgemaakt. Tijdens de laatste periode had hij meer stollingsfactoren nodig, tevens had hij een blaasretentie ten gevolge van bloedstolsels.

Bij lichamelijk onderzoek vonden wij lichte slagpijn aan de rechter zijde. Laboratoriumonderzoek liet geen afwijkingen zien: Hb: 9,8 mmol/l (normaal: 8,5-11,0); Ht: 0,47 (normaal: 0,41-0,50); creatinine: 81  $\mu$ mol/l (normaal: 50-100). Urinesediment en -kweek waren niet afwijkend. Echografisch onderzoek van de urinewegen liet behoudens geringe dilatatie van de calices in de onderpool van de rechter nier geen afwijkingen zien. Om eventuele morfologische afwijkingen aan de afvoerende urinewegen uit te sluiten, werd een intraveneus pyelogram (IVP) gemaakt. Het IVP toonde een impressie aan de mediale zijde van het pyelum van de rechter nier. Omdat geen duidelijkheid verkregen kon worden over de aard van de afwijking, werd CT verricht, waarbij een arterioveneuze malformatie in de rechter nier geconstateerd werd (figuur 2a). Naar aanleiding van deze bevinding werd de anamnese verder uitgediept, waaruit bleek dat patiënt op 5-jarige leeftijd een stomp buiktrauma met een fietsje had doorgemaakt. Bij aanvullend lichamelijk onderzoek werd over de rechter nierloge een duidelijk vaatgeruis gehoord. In overleg met de hematoloog en de radioloog werd besloten tot angiografie met eventuele embolisatie.

Angiografisch werd een hypertrofische arteriële voeder naar de arterioveneuze fistel in de rechter nier gezien (zie figuur 2b). Op geleide van 3-dimensionale rotatieangiografie werd een cobrakatheter van 8 Fr. in de fistel gebracht en deze kon geemboliseerd worden door middel van 2 loslatende ballonnen van respectievelijk 14 en 11 mm. De eerste ballon bevond zich

op de arterioveneuze overgang, de tweede lag zuiver in het arteriële gedeelte van de fistel.

Op de controleopnamen was een volledige opheffing van de doorstroming van de fistel te zien en er was een toename van de stroom door normaal gevormde vaten in de onderpool van de rechter nier (zie figuur 2c).

Na de embolisatie bleven de waarden van factor III stabiel en 1 week later werd patiënt in goede klinische toestand ontslagen. Scintigrafisch onderzoek met technetium-99m-succimer (DMSA) na 1 maand liet twee goed functionerende nieren zien met een klein parenchymdefect in de bovenpool van de rechter nier. De functieverdeling was: links 57% en rechts 43%.

Patiënt C, een vrouw van 23 jaar, was sinds een halfjaar bekend wegens tubereuze sclerose (ziekte van Bourneville-Pringle). Zij werd elders ter observatie opgenomen in verband met plotseling ontstane buikpijnklachten aan de linker zijde. Daarbij was zij kortdurend misselijk geweest en had zij gebrakt. Behoudens macroscopische hematurie had zij geen mictieklachten.

Bij lichamelijk onderzoek maakte patiënte een zieke indruk. De bloeddruk was 110/65 mmHg, de polsfrequentie 80/min. Er was drukpijn in de linker buikhelft, tevens slagpijn links. Laboratoriumonderzoek toonde: Hb: 6,7 mmol/l; Ht: 0,32 l/l; leukocytenaantal:  $17,1 \times 10^9/l$  (normaal: 4,0-11,0); BSE: 41 mm/te uur (normaal: 1-20); creatinine: 74  $\mu$ mol/l. Onderzoek van het urinesediment bracht erythrocyturie aan het licht. Echografisch onderzoek van het abdomen liet een grote afwijking tussen de milt en de linker nier, en beiderzijds afwijkende nieren zien. Bij nadere analyse met CT van het abdomen werden in beide nieren angiomyolipomen vastgesteld, waarvan de grootste in de linker nier gelokaliseerd was met een diameter van 10 cm. In dit angiomyolipoom en pararenaal links was een groot hematoom zichtbaar (figuur 3a). Dezelfde dag werd patiënte naar ons ziekenhuis overgeplaatst voor verdere observa-

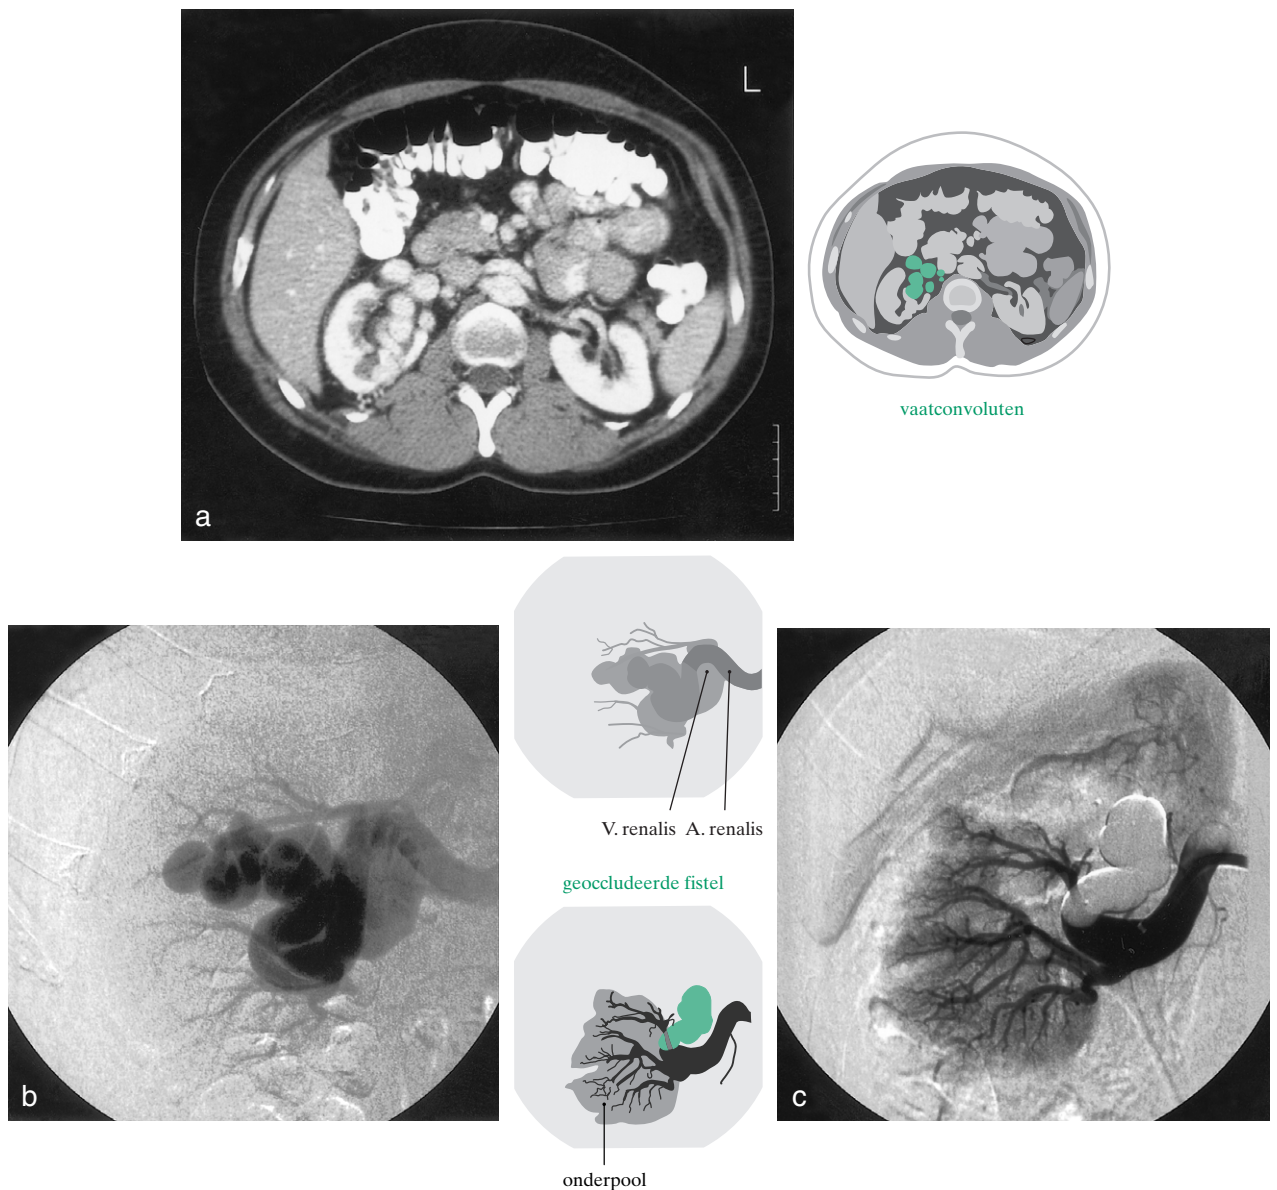

FIGUUR 2. Beeldvormend onderzoek bij patiënt B: (a) CT-scan van het abdomen met mediaal in de rechter nier een arterioveneuze malformatie: wijdverlopende vaatconvoluten die doorlopen in de nierhilus en de onderpool; (b) een angiogram van de rechter nier laat uitgebreide arterioveneuze fisteling zien; een voedende hypertrofische A.-renalistak staat in verbinding met de V. renalis; (c) nadat een katheter in de fistel is geplaatst, wordt deze met twee loslatende ballonnen geëmboliseerd, wat resulteert in een volledige opheffing van de doorstroming in de fistel en een normaal doorbloede rechter onderpool.

tie en eventuele behandeling. In verband met een Hb-concentratie van inmiddels 5,2 mmol/l kreeg zij een bloedtransfusie. Op een DMSA-scan werd een verminderde nierfunctie links gezien: de functieverdeling was: links 25% en rechts 75%. Angiografisch onderzoek liet zien dat 3 takken van de bovenpoolnierarterie pathologische vaten verzorgden naar een groot angiomyolipoom. De onderpool had een aparte vaatvoorziening.

Vervolgens werden deze bovenste 3 takken via een microkatheter 'superselectief' geëmboliseerd door het inbrengen van 4-mm-coils (zogenaamde Gianturco-coils), hetgeen resulteerde in een succesvolle occlusie van de genoemde 3 takken. Op een controlerenogram enkele dagen later werd een nauwe-

lijks veranderde nierfunctieverhouding gezien: links 21% en rechts 79%. Na de embolisatie bleef de Hb-concentratie stabiel en patiënte kon in goede klinische toestand naar huis ontslagen worden. Op een controle-CT-scan 9 maanden later werden in de linker nier, behoudens een beeld passend bij de eerdere embolisatie (oude hematomen en embolisatiecoils), geen afwijkingen gezien (zie figuur 3b). De functie van de onderpool van de linker nier was onveranderd goed.

#### BESCHOUWING

Een nierbloeding kan verschillende oorzaken hebben: iatrogene, zoals nierbiopsie (bloedingsfrequentie 7 tot

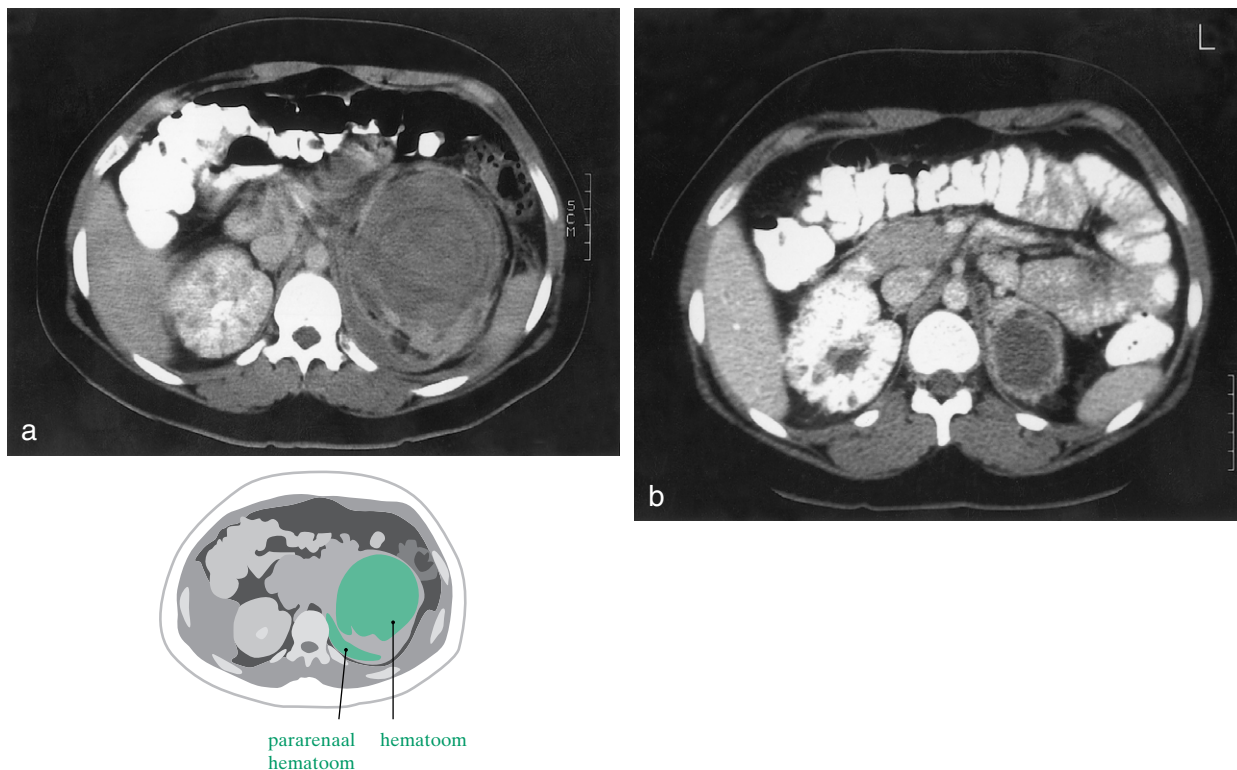

FIGUUR 3. CT-scans van het abdomen van patiënt C met (a) in de linker nier een 10 cm groot angiomyolipoom met een hematoom. Tevens is er pararenaal een hematoom zichtbaar; (b) controleopname 9 maanden na de embolisatie laat een oud hematoom in de bovenpool van de linker nier zien.

17%),<sup>5</sup> percutane nefrolithotripsie (1%)<sup>6</sup> (patiënt A) of percutane nefrostomie (1,3%),<sup>7</sup> of een trauma of maligniteit. Daarnaast zijn er zeldzamere oorzaken, zoals arterioveneuze malformaties<sup>8</sup> en angiomyolipomen<sup>9</sup> van de nieren (respectievelijk patiënt B en C).

**Percutane nefrostomie.** Het verrichten van een percutane nefrostomie is een veelgebruikte procedure ter verkrijging van toegang tot het verzamelstelsel van de nier om een obstructie van de bovenste urinewegen op te heffen. Een ernstige bloeding als gevolg van de ingreep kan bij 0,2% van de patiënten fataal zijn.<sup>7</sup> Indien percutane nefrostomie verricht wordt via een calix is de kans op een letsel van een intrarenaal vat het kleinst.<sup>10</sup>

**Percutane nefrolithotripsie.** Bij het behandelen van grote stenen in de bovenste urinewegen heeft percutane nefrolithotripsie de voorkeur. Hoewel de techniek veilig en effectief is, kunnen er (soms onvermijdbare) vaatletsels veroorzaakt worden die in het verlies van een nier kunnen resulteren.<sup>11</sup> Een ernstige bloeding na percutane nefrolithotripsie komt voor bij 1,0-2,0% van de patiënten en ontstaat meestal binnen 3 weken.<sup>6</sup>

**Arterioveneuze malformaties.** Met een frequentie van minder dan 0,04% zijn renale arterioveneuze malformaties een zeldzaam verschijnsel.<sup>8</sup> De frequentie neemt echter toe door het toepassen van percutane transrenale ingrepen, zoals percutane nefrolithotripsie, percutane nefrostomie en nierbiopsie.<sup>5-8</sup> Ze kunnen ook ontstaan

bij een maligniteit (tumorneovascularisatie), bij pyonefrose en bij niet-iatrogene stompe (patiënt B) of penetrerende trauma's. Voor het diagnosticeren van een arterioveneuze malformatie is angiografie van de renale vaten de gouden standaard en zijn echodoppleronderzoek, IVP, CT en MRI minder geschikt.<sup>12-13</sup> Daar een arterioveneuze malformatie een zeldzame oorzaak van hematurie is, wordt in eerste instantie aan de aanwezigheid van andere afwijkingen (urolithiase, maligniteit) gedacht en zal angiografie in de praktijk (patiënt B) niet als eerste onderzoek uitgevoerd worden.

**Angiomyolipoom.** Angiomyolipomen van de nieren (1-3% van alle niertumoren) zijn benigne tumoren die opgebouwd zijn uit vetweefsel, dikwandige bloedvaten en glad spierweefsel.<sup>14</sup> Er bestaat een relatie met tubereuze sclerose in die zin dat 80% van de patiënten met deze ziekte één of meer angiomyolipomen in de nieren heeft; omgekeerd heeft slechts 40% van de patiënten met een angiomyolipoom tubereuze sclerose.<sup>14</sup> Renale angiomyolipomen zijn ook bij andere facomatosen aanwezig, zoals ziekte van Von Recklinghausen, ziekte van Von Hippel-Lindau en ziekte van Sturge-Weber. Het beleid bij een angiomyolipoom is afhankelijk van de grootte en de klinische verschijnselen.<sup>15</sup> Angiomyolipomen met een diameter < 4,0 cm (de grootste groep) zijn vaak asymptomatisch en hoeven niet behandeld te worden. Wel dienen ze bij aangetoonde groei bij volwasse-

nen jaarlijks met CT gecontroleerd te worden en bij kinderen met echografie. De angiomyolipomen groter dan 4,0 cm hebben een onvoorspelbaar beloop (er is meer dan 50% kans op spontane bloeding) en worden derhalve in onze kliniek preventief geëmboliseerd.

**Embolisatie.** Deze ingreep gebeurt door middel van selectieve katheterisatie van de voedende nierarterie en injecteren van afsluitende partikels. De partikels lopen vast in de kleine zijtakken van de A. renalis, hetgeen een vaatocclusie veroorzaakt, wat resulteert in het stoppen van de bloeding. Het optreden van ischemie van het nierparenchym na embolisatie is wisselend (afhankelijk van het vaatletsel en de materiaalkeuze bij de embolisatie), maar is over het algemeen beperkt (10-15%) en veel minder dan bij (segmentale) chirurgie.<sup>1,2</sup> Een ander voordeel is dat bij een recidiefbloeding de ingreep herhaald kan worden.

Als embolisatiemateriaal worden gebruikt: Gianturco-coils, polyvinylalcoholpartikels, loslaatbare ballonnen en resorbeerbare gelatinesponsjes.<sup>1</sup> De coils, dichtgewonden metalen spiraaltjes die zich vastzetten in de vaatwand, zijn het succesvolst, omdat ze voor een permanente occlusie van de bloedende vaten zorgen en er de minste kans op parenchymverlies is. Ze worden vooral gebruikt voor proximale renovasculaire letsels. Polyvinylalcoholpartikels geven eveneens een permanente occlusie en worden gebruikt voor distale vaatletsels, maar er is – om onbekende reden – een grotere kans op het ontstaan van renineafhankelijke hypertensie. Met ballonnen, die met name toegepast worden bij grotere bloedende arteriën, worden eveneens goede resultaten geboekt. Echter, de kans op parenchymverlies is hierbij groter. De resorbeerbare gelatinesponsjes worden steeds minder gebruikt, daar het occlusief effect kortdurend is en er derhalve meer kans op rekanalisatie aanwezig is, waardoor de kans op een recidiefbloeding groot is.

Door de ischemie van een deel van het nierparenchym en de infarcering van het nierweefsel is er bij ongeveer 10% van de patiënten na de embolisatie hypertensie, die zelden blijvend is.<sup>2</sup> De totale nierfunctie blijft onveranderd ten opzichte van vóór de embolisatie. Na de embolisatie kan zich gedurende enkele dagen het zogenaamde postembolisatiesyndroom voordoen, waarbij flankpijn, misselijkheid, braken en koorts kunnen voorkomen. Deze klachten kunnen medicamenteus behandeld worden.

Contra-indicaties voor het uitvoeren van de ingreep zijn stollingsstoornissen, nierfalen en ernstige contrastmiddelallergie.

Bij alledrie beschreven patiënten werden de nierbloedingen door embolisatie gestopt. Zij ondergingen geen radicale operatie en de nierfunctie kon behouden blijven. Bij de laatste follow-up, na respectievelijk 2, 2,5 en 2,5 jaar, was geen recidiefbloeding opgetreden.

#### CONCLUSIE

De besproken patiëntengeschiedenissen illustreren dat bij persisterende nierbloedingen waarbij conservatieve therapie faalt, selectieve embolisatie van het vaatletsel

de behandeling van keuze is. Selectieve embolisatie is minimaal invasief en heeft als belangrijk voordeel het behoud van de nierfunctie.

---

#### ABSTRACT

*Persistent renal bleeding treated with selective vascular embolisation with preservation of renal function.* – In three patients with persistent blood loss from bleeding or abnormal renal vessels, kidney function was preserved by treatment with selective embolisation. The first patient, a 42-year-old woman, suffered from persistent haematuria after undergoing percutaneous nephrolithotripsy on the left side. Because conservative methods had failed and renal artery bleeding as a result of the lithotripsy was suspected, angiography with selective coil embolisation of a segmental branch of the lower pole artery of the kidney was performed. The second patient, a 40-year-old man with severe haemophilia A had been suffering from recurring macroscopic haematuria for a few months. CT showed an arteriovenous malformation in the right kidney. Angiography in combination with embolisation with two detachable balloons resulted in occlusion of the malformation. The third patient, a 23-year-old woman with tuberous sclerosis, presented with left abdominal pain, haematuria and decreasing haemoglobin concentrations. CT revealed a left renal angiomyolipoma, 10 cm in size, with a large internal haematoma. Three pathological branches of the upper pole renal artery were successfully occluded with Gianturco coils. At follow-up after 2, 2,5 and 2,5 years respectively, no recurrence of bleeding had occurred. Selective embolisation should be attempted as means of treatment for persistent renal bleeding if conservative treatment fails. Selective embolisation is minimally invasive and has the important advantage of preserving renal function.

---

#### LITERATUUR

- 1 Beaujeux R, Saussine C, al-Fakir A, Boudjema K, Roy C, Jacqmin D, et al. Superselective endo-vascular treatment of renal vascular lesions. *J Urol* 1995;153:14-7.
- 2 Huppert PE, Duda SH, Erley CM, Roth M, Lauchart W, Dietz K, et al. Embolization of renal vascular lesions: clinical experience with microcoils and tracker catheters. *Cardiovasc Intervent Radiol* 1993; 16:361-7.
- 3 DeSouza NM, Reidy JF, Koffman CG. Arteriovenous fistulas complicating biopsy of renal allografts: treatment of bleeding with superselective embolization. *AJR Am J Roentgenol* 1991;156: 507-10.
- 4 Heyns CF, Vollenhoven P van. Increasing role of angiography and segmental artery embolization in the management of renal stab wounds. *J Urol* 1992;147:1231-4.
- 5 Ekelund L, Lindholm T. Arteriovenous fistulae following percutaneous renal biopsy. *Acta Radiol Diagn (Stockh)* 1971;11:38-48.
- 6 Martin X, Murat FJ, Feitosa LC, Rouvière O, Lyonnet D, Gelet A, et al. Severe bleeding after nephrolithotomy: results of hyperselective embolization. *Eur Urol* 2000;37:136-9.
- 7 Stables DP. Percutaneous nephrostomy: techniques, indications, and results. *Urol Clin North Am* 1982;9:15-29.
- 8 Cho KJ, Stanley JC. Non-neoplastic congenital and acquired renal arteriovenous malformations and fistulas. *Radiology* 1978;129:333-43.
- 9 Gentry LR, Gould HR, Alter AJ, Wegenke JD, Atwell DT. Hemorrhagic angiomyolipoma: demonstration by computed tomography. *J Comput Assist Tomogr* 1981;5:861-5.
- 10 Sampaio FJB, Uflacker R. Renal anatomy applied to urology, endourology, and interventional radiology. New York: Thieme; 1993. p. 86-76.
- 11 Kernohan RM, Johnston LC, Donaldson RA. Bleeding following percutaneous nephrolithotomy resulting in loss of the kidney. *Br J Urol* 1990;65:657-8.

<sup>12</sup> Crotty KL, Orihuela E, Warren MM. Recent advances in the diagnosis and treatment of renal arteriovenous malformations and fistulas. *J Urol* 1993;150(5 Pt 1):1355-9.

<sup>13</sup> Takaha M, Matsumoto A, Ochi K, Takeuchi M, Takemoto M, Sonoda T. Intrarenal arteriovenous malformation. *J Urol* 1980; 124:315-8.

<sup>14</sup> Steiner MS, Goldman SM, Fishman EK, Marshall FF. The natural history of renal angiomyolipoma. *J Urol* 1993;150:1782-6.

<sup>15</sup> Oesterling JE, Fishman EK, Goldman SM, Marshall FF. The management of renal angiomyolipoma. *J Urol* 1986;135:1121-4.

Aanvaard op 7 januari 2002

## Longklachten bij lymfoplasmocytair lymfoom (ziekte van Waldenström)

J.G.J.V.AERTS, F.DE JONGH, C.E.VAN IPEREN, K.H.LAM, H.C.HOOGSTEDEN EN J.P.A.M.VAN MEERBEECK

Bij patiënten met lymfoproliferatieve aandoeningen worden frequent longinfiltraten aangetroffen. Doordat deze patiëntengroep vaak een afweerstoornis heeft, dient in eerste instantie aan een infectieus proces gedacht te worden. Daarnaast is er nog een aantal andere verklaringen voor longinfiltraten. Gezien de grote kans op een fulminant beloop van een infectieus proces bij een afweerstoornis, is vroegtijdige adequate, zo nodig invasieve diagnostiek daarvan gewenst. Wij beschrijven een patiënt met een lymfoplasmocytair lymfoom, bij wie beiderzijds diffuse longinfiltraten aangetroffen werden. Bij deze patiënt was er uiteindelijk geen infectie. Bronchoscopie met bronchoalveolaire lavage leidde tot de diagnose.

### ZIEKTEGESCHIEDENIS

Patiënt A, een 54-jarige man, presenteerde zich met klachten van kortademigheid, die bleken samen te hangen met ophoping van pleuravocht links. Er was geen hepatosplenomegalie. Aanvullend laboratoriumonderzoek toonde een BSE van 30 mm/1e uur (normaal  $\leq 12$ ) en een paraproteïnemie in het gebied van de gammaglobulinen. De IgM-concentratie bedroeg 24 g/l (normaal  $\leq 2,3$ ), met een hoge concentratie van de  $\kappa$ -component van IgM. Beenmergonderzoek liet een monoklonale lymfoplasmacytoïde proliferatie van IgM- $\kappa$ -producerende cellen zien en in het perifere bloed werd dezelfde monoklonale lymfocytenpopulatie aangetroffen. Het pleuravocht betrof exsudaat en was celrijk, met een  $\kappa$ -positieve monoklonale lymfoplasmocytair celpopulatie, passend bij een hematologische maligniteit. De diagnose luidde 'lymfoplasmocytair lymfoom (ziekte van Waldenström)'. De voorgeschiedenis van patiënt vermeldde niet-insulineafhankelijke diabetes mellitus en een chronisch obstructieve longziekte (COPD) met bij longfunctieonderzoek aanwijzingen voor emfyseem.

Patiënt werd behandeld met pleuradrainage en een pleurodese met bleomycine. Tevens werd behandeling met chloorambucil en prednison ingesteld. De hematologische afwijkingen toonden echter progressie (toename van de anemie en oplopende IgM-concentratie) en de accumulatie van pleuravocht

### SAMENVATTING

Een 62-jarige man, sinds enkele jaren bekend wegens een lymfoplasmocytair lymfoom, werd gezien wegens toegenomen kortademigheidsklachten. Op afbeeldend onderzoek had hij multiële longinfiltraten. Omdat aan een infectie werd gedacht, werd bronchoscopie met bronchoalveolaire lavage verricht, maar er werd geen infectieus agens gevonden. Bij cytologisch onderzoek was er een sterk verhoogd aantal  $\kappa$ -positieve B-lymfocyten, zoals die gevonden kunnen worden bij een lymfoplasmocytair lymfoom (ziekte van Waldenström). Na chemotherapeutische behandeling verminderde de dyspneu en verdwenen de longinfiltraten. Bij patiënten met een lymfoproliferatieve ziekte worden relatief frequent infectieuze longinfiltraten aangetroffen. Deze casus toonde een zeldzame complicatie van de ziekte, namelijk longinfiltraten veroorzaakt door infiltratie met lymfoplasmocytair cellen. Het belang van het verrichten van cytologische diagnostiek van bronchoalveolaire lavagevloeistof wordt met deze casus benadrukt.

recideerde. Daarom werden 6 maanden na het begin van de therapie 8 kuren cyclofosfamide, vincristine en prednison (CVP) toegevend. Hierop daalde de IgM-spiegel tot 4,1 g/l.

Een jaar later nam wederom de hoeveelheid pleuravocht toe en liep de IgM-concentratie op. Onder CVP-medicatie trad progressie op, waarna patiënt werd verwezen naar ons centrum.

Wij zetten behandeling in met fludarabine en na 6 kuren was patiënt in een partiële remissie. Na 2 jaar trad echter opnieuw een recidief op. Weer werd CVP-chemotherapie ingesteld. Na 8 kuren was de IgM-concentratie gedaald naar 1,6 g/l met een nog aanwezige monoklonale component. De hoeveelheid pleuravocht was ook afgenomen.

Drie jaar later ontstond een recidief dat niet reageerde op CVP-behandelingen. De IgM-concentratie liep op tot 77 g/l. Patiënt kreeg behandeling met chloorambucil en prednison en na 6 maanden was er een partiële respons. De therapie werd gestopt wegens gastro-intestinale bijwerkingen. Er volgde een expectatief beleid.

Anderhalf jaar later meldde patiënt bij poliklinische controle een sinds enkele weken bestaande, toenemende dyspneu. Inmiddels was hij 62 jaar. Door de huisarts was hij reeds behandeld met een kuur amoxicilline. De lichaamstemperatuur was niet verhoogd. Patiënt hoestte altijd al dagelijks wat witgekleurd sputum op, hetgeen nu niet was veranderd, zonder hemoptoë. In de periode voorafgaand aan de dyspneu was geen sprake van immobilisatie. Patiënt hield tropische vogels als huisdieren. Hij rookt niet meer sinds 11 jaar.

Bij het lichamelijk onderzoek zagen wij een magere man met een temperatuur van 36,8°C, een polsfrequentie van 120/min

Academisch Ziekenhuis Rotterdam-Daniel den Hoed Kliniek, Rotterdam.

Afd. Longziekten: dr.J.G.J.V.Aerts (thans: Sint Franciscus Gasthuis, afd. Longziekten, Kleiweg 500, 3045 PM Rotterdam) en dr.J.P.A.M.van Meerbeeck, longartsen; prof.dr.H.C.Hoogsteden, longarts-intensivist.

Afd. Interne Oncologie: F.de Jongh, internist.

Afd. Hematologie: mw.dr.C.E.van Iperen, internist-hematoloog.

Afd. Pathologie: dr.K.H.Lam, patholoog.

Correspondentieadres: dr.J.G.J.V.Aerts.
