# Supplementary material
Source: PubMed Central journal article supplement (PMC7120863)
Supplement: 978-90-368-1841-4_2_MOESM6_ESM.pdf [file 978-90-368-1841-4_2_MOESM6_ESM.pdf]

# Embolisatie bij een spontane hematopneumothorax

Erwin A. Gorter, Emile F.L. Dubois, Onno R. Guicherit, Thijs A.J. Urlings en J.C. Alexander de Mol van Otterloo

- ACHTERGROND** Een spontane hematopneumothorax is een zeldzaam ziektebeeld, gedefinieerd als een spontane pneumothorax waarbij zich meer dan 400 ml bloed in de pleuraholte bevindt.
- CASUS** Een 32-jarige man meldde zich op de SEH met stekende pijn in de rechter thoraxhelft en daarbij moeite met doorzuchten. De X-thorax liet een hydro-pneumothorax rechts zien. Hierop werd een drain ingebracht waarbij direct 1500 ml sanguinolent vocht afliep. In eerste instantie werd op de CT-scan geen bloeding gezien. Enkele uren later raakte de patiënt hemodynamisch instabiel en werd er een CT-angiografie verricht. Deze liet een extravasaat zien in de regio van de A. intercostalis posterior II, die aansluitend werd geëmboliseerd. Hierdoor werd een stabiele situatie gecreëerd, zodat electieve 'video-assisted thoracic surgery' (VATS) mogelijk werd.
- CONCLUSIE** Een spontane hematopneumothorax is een levensbedreigend ziektebeeld. Na initiële drainage verdient VATS de voorkeur boven een conservatief beleid of thoracotomie. Echter, een hemodynamische stabiele patiënt is daarvoor wel een vereiste. In deze casus heeft interventieradiologie ertoe bijgedragen om minimaal invasief te kunnen blijven. Dit dient dan ook als behandelingsoptie overwogen te worden.

Een spontane hematopneumothorax is een potentieel levensbedreigende aandoening, die door Laennec in 1828 voor het eerst beschreven werd. Er is sprake van een spontane hematopneumothorax indien er zich meer dan 400 ml bloed in de pleuraholte ophoopt als complicatie van een spontane pneumothorax.<sup>1,2</sup> In de literatuur wordt dit beeld bij 2-5% van alle patiënten met een spontane pneumothorax gerapporteerd.<sup>2-6</sup> De patiënt presenteert zich over het algemeen met klachten passend bij een pneumothorax in combinatie met mogelijke hemodynamische instabiliteit door continu bloedverlies.<sup>1,2</sup>

## ZIEKTEGESCHIEDENIS

**Patiënt A**, een 32-jarige man met een blanco voorgeschiedenis, meldde zich op de Spoedeisende Hulp met een stekende pijn in de rechter thoraxhelft en daarbij moeite met doorzuchten. Deze klachten waren acuut ontstaan tijdens het voetballen eerder die dag, zonder voorafgaand trauma. Patiënt had 2 weken eerder in mindere mate vergelijkbare klachten, die binnen enkele dagen spontaan waren verdwenen. Per dag rookte hij ongeveer 15 sigaretten; de overige anamnese was pulmonaal niet belast.

Bij lichamelijk onderzoek werd een dyspnoïsche, slanke, jonge man gezien, met pijn bij doorzuchten. Over de rechter thoraxhelft was verminderd ademgeruis hoorbaar met hypertympane percussie. Overig lichamelijk onderzoek en controles waren niet-afwijkend. De X-thorax liet een volledig gecollabeerde rechter long zien met een niet-afgrensbaar rechter hemidiafragma door vocht in de thoraxholte (figuur 1). Bij binnenkomst was de Hb-waarde 8,2 mmol/l (referentiewaarde: 8,5-11,0).

Medisch Centrum Haaglanden, Den Haag.

Afd. Heelkunde: drs. E.A. Gorter, arts;

dr. J.C.A. de Mol van Otterloo, chirurg.

Afd. Longgeneeskunde: dr. E.F.L. Dubois, longarts.

Afd. Radiologie: drs. T.A.J. Urlings, aios radiologie.

Bronovo, afd. Heelkunde, Den Haag.

Dr. O.R. Guicherit, chirurg.

Contactpersoon: drs. E.A. Gorter

(e.a.gorter@gmail.com).

Eerst werd een thoraxdrain ingebracht, waarna direct 1500 ml sanguinolent vocht afliep. De aanvullende CT-scan liet geen bloeding in de longen zien; wel enkele apicale bullae, 'blebs' (buiten het longparenchym gelokaliseerde ophopingen van lucht in de pleura) en een matige hoeveelheid resterend vocht. Omdat de Hb-waarde daalde tot 4,7 mmol/l en een persisterend bloedverlies werd vermoed, werd een CT-angiografie gemaakt. Hierbij was een apicale contrastextravasatie zichtbaar (figuur 2), die echter niet gezien werd op de angiografie die aansluitend hierop werd verricht. Wel werd een zijtakje van de A. intercostalis posterior IV rechts preventief geëmboliseerd vanwege een dissectiebeeld. Ondanks dat de bloedingfocus niet geëmboliseerd kon worden, leek de bloeding te zijn gestopt.

Enkele uren later werd patiënt opnieuw hemodynamisch instabiel en was op de CT-angiografie wederom een extravasatie te zien. Ditmaal was angiografisch een actieve extravasatie zichtbaar in de regio van de A. intercostalis posterior II rechts, die succesvol werd geëmboliseerd (figuur 3). Hierna bleef de patiënt hemodynamisch stabiel. (kijk op [www.ntvg.nl](http://www.ntvg.nl) voor videobeelden van deze angiografie, zoeken op A4425).

Na 3 dagen werd door middel van 'video-assisted thora-

cic surgery' (VATS) het resterende hematoom verwijderd en een bullectomie en pleurectomie verricht. De uitslag van het pathologisch onderzoek vermeldde 'bulleus longemfyseem'. Het herstel van patiënt was ongecompliceerd en na 7 dagen kon hij uit het ziekenhuis worden ontslagen. Na 3 weken had hij zijn werkzaamheden volledig hervat.

## BESCHOUWING

### KLINISCHE PRESENTATIE EN DIAGNOSTIEK

Bij een spontane pneumothorax moet men bedacht zijn op een spontane hematopneumothorax indien hemodynamische instabiliteit optreedt. De klinische presentatie is aanvankelijk vergelijkbaar, maar bij een spontane hematopneumothorax kan dyspneu veel meer op de voorgrond staan.<sup>6</sup>

Bij patiënten met een hematopneumothorax wordt op de 1e X-thorax bij 70% een hematothorax gezien en bij slechts 10% een pneumothorax. Bij de overige 20% wordt een onduidelijke sluierring gezien in een costofrenische hoek.<sup>1</sup> Daarnaast resulteert het continue bloedverlies bij 13-46% van de patiënten in een hemodynamische shock.<sup>1</sup> Omdat het vaak jonge patiënten betreft die langere tijd een hypo-

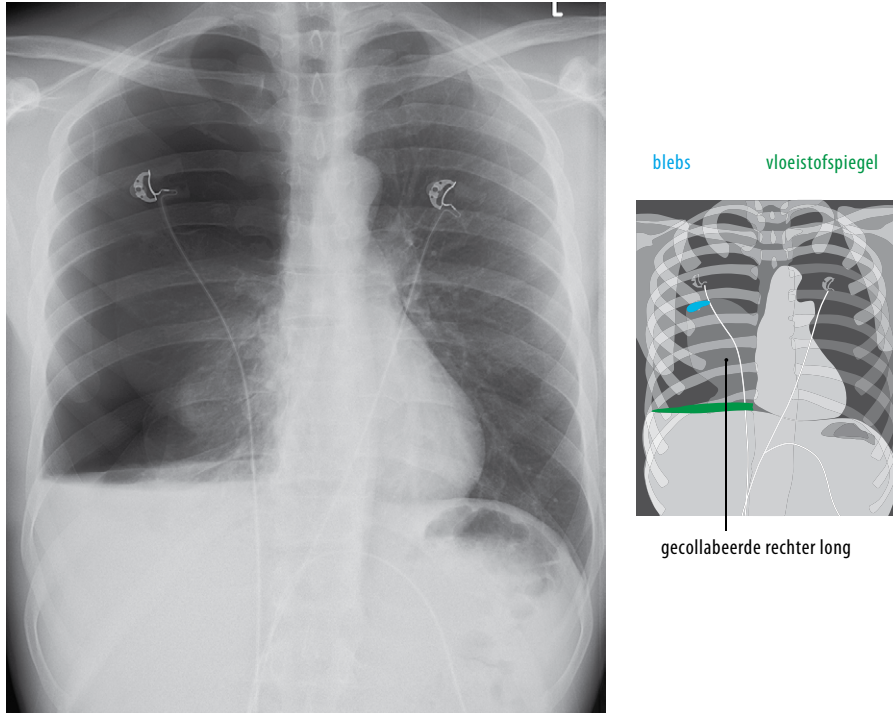

**FIGUUR 1** Staande posteroantereure-thoraxfoto van patiënt A. Volledig gecollabeerde rechter long met een vloeistofspiegel passend bij een hydropneumothorax. Apicaal in de gecollabeerde long zijn enkele blebs zichtbaar.

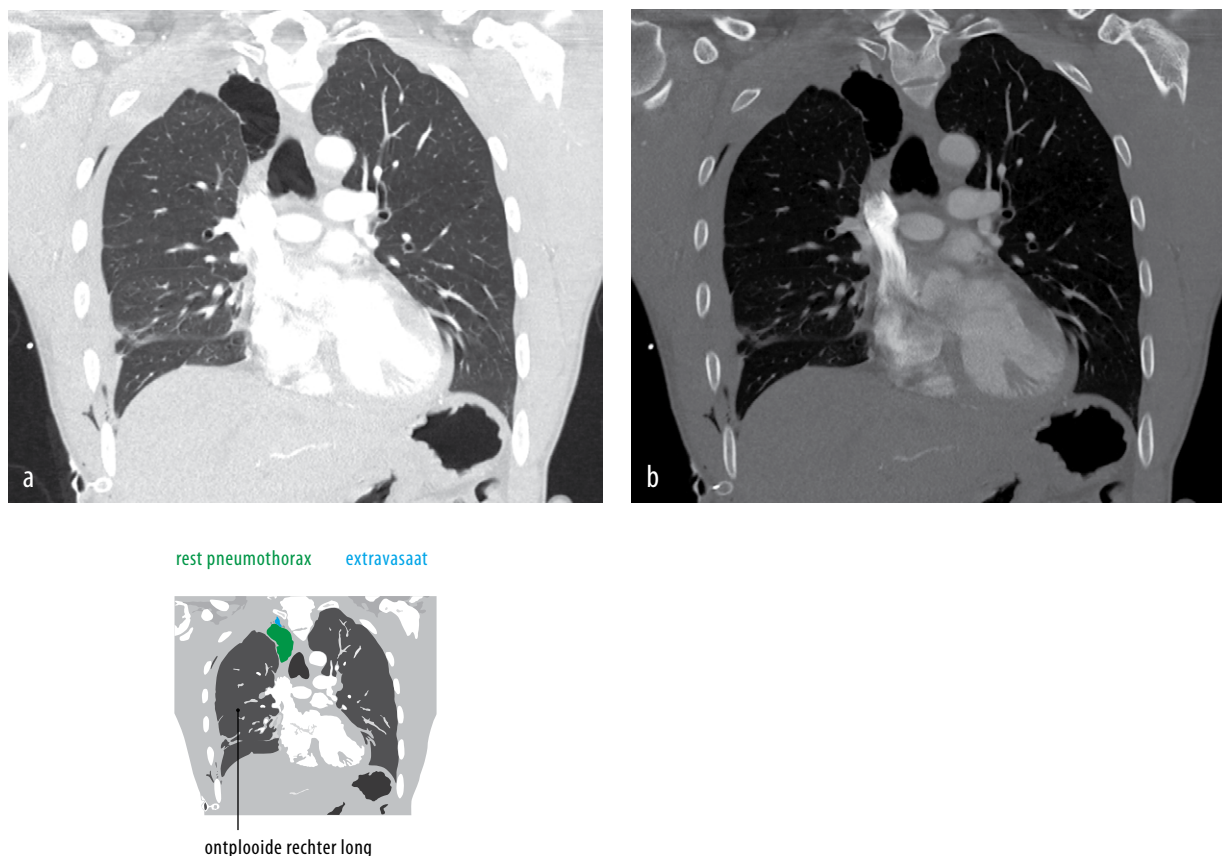

**FIGUUR 2** CT-angiografie met coronale coupes, (a) longinstelling (b) weke-deleninstelling. Apicaal extravasatie van contrast bij bloeding. De rechter long is beter ontplooid ten opzichte van de eerdere thoraxfoto na het plaatsen van een thoraxdrain.

volemie verdragen alvorens hemodynamisch instabiel te worden, zijn de klinische verschijnselen van hypovolemie of shock in eerste instantie vaak niet aanwezig.

#### OORZAAK

De oorzaak van de bloeding bij een spontane hematopneumothorax is anders dan bij een spontane pneumothorax. Bij een hematothorax is de bloeding vaker het gevolg van een stollingsstoornis, thoracale tumor, vasculaire malformatie, exostose of endometriose.<sup>7</sup> Bij een spontane hematopneumothorax is de bloedingsoorzaak vaak een adhesie tussen de pleura parietalis en pleura visceralis die losgetrokken wordt. Dit heeft als gevolg dat een ingegroeide arterie tussen beide pleurae – pariëtaal of aberrant – kan ruptureren.<sup>1</sup> Een scheur in een gevasculariseerde bulla en het onderliggend longparenchym kan een andere oorzaak zijn.<sup>1,7</sup> Een spontane hematopneumothorax wordt ook beschreven bij het Ehlers-Danlos syndroom, systemische lupus erythematoses en sarcoidose.<sup>1</sup>

Bij onze patiënt werd de uiteindelijke oorzaak niet achterhaald. Mogelijk had hij 2 weken eerder ook al een pneumothorax doorgemaakt gezien de aanwezige bullae en blebs. Een hierbij ontstane adhesie zou nu gescheurd kunnen zijn, hoewel de tijd voor neovascularisatie van deze adhesie te beperkt was. Wel heeft 1 op de 5 patiënten met een hematopneumothorax eerder een spontane pneumothorax doorgemaakt.<sup>1</sup> Een andere hypothese was de aanwezigheid van een afgescheurde aberrante arterie tussen de pleura parietalis en bullae.

#### BEHANDELING

De initiële behandeling bestaat uit het inbrengen van een thoraxdrain. Over het vervolgbeleid bestaat nog geen consensus. Enerzijds wordt de voorkeur gegeven aan een conservatief beleid waarbij de hoeveelheid bloedverlies in de eerste 24 h afneemt en de patiënt hemodynamisch stabiel blijft.<sup>1,5</sup> Hierbij moeten een aantal kanttekeningen worden geplaatst. Allereerst bestaat de mogelijkheid dat een afgesloten of een slecht geïmposeerde drain ten

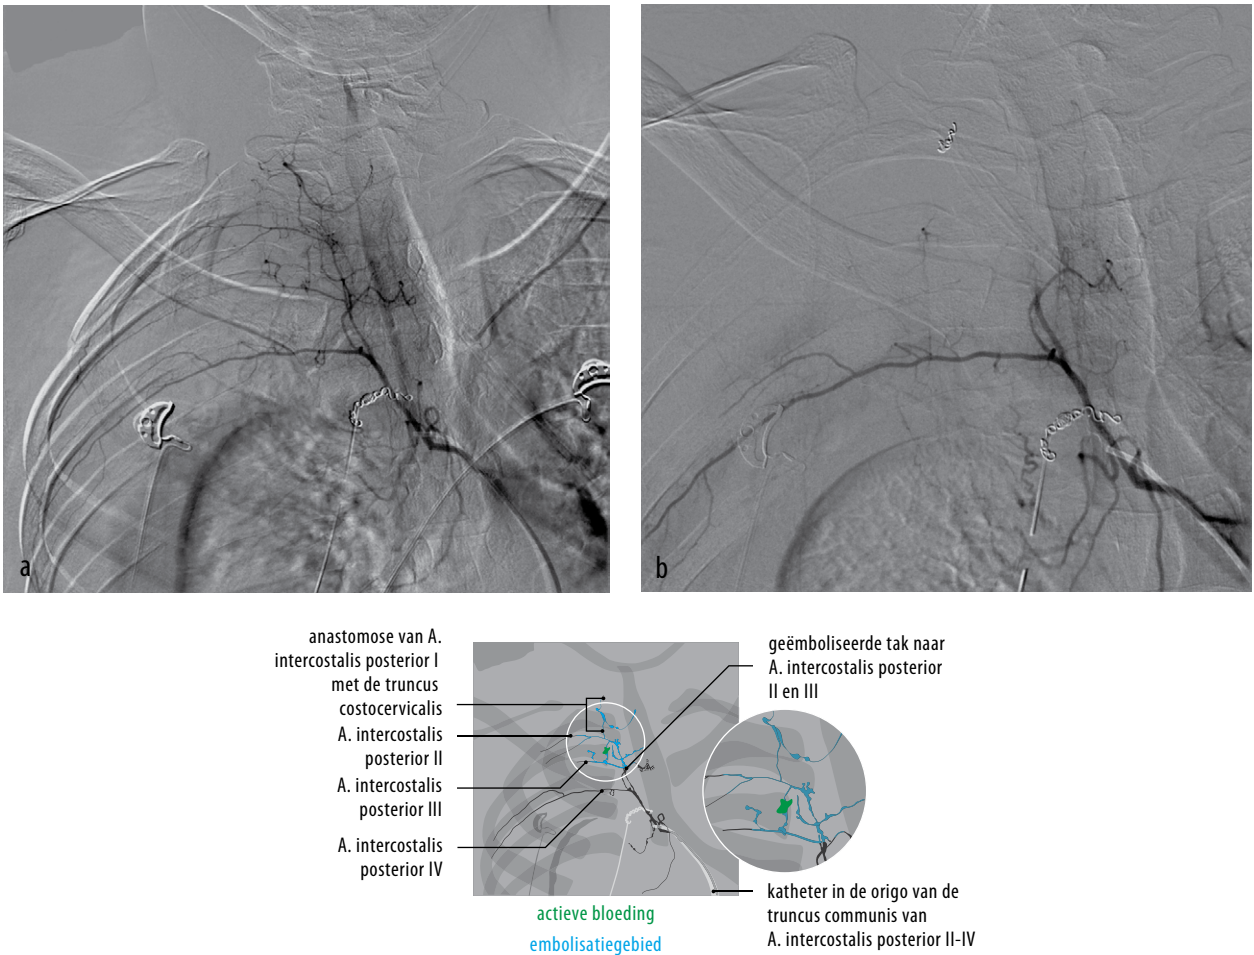

**FIGUUR 3** Coronale angiografische opnames. (a) Opname voor embolisatie van de truncus communis van de A. intercostalis posterior II-IV. De extravasatie gezien op de CT-angiografie, werd gelokaliseerd in de regio van de A. intercostalis posterior II. Bij latere selectieve afbeelding van de truncus costocervicalis werd vanuit hier dezelfde bloedingsfocus geïdentificeerd, bij een bestaande anastomose. (b) Opname na embolisatie. Coils in de origo van de truncus costocervicalis. Geëmboliseerde takken van de A. intercostalis posterior II en III met partikels. Verder coils in een zijtakje van de A. intercostalis posterior IV van de eerdere embolisatie. (Kijk op [www.ntvg.nl](http://www.ntvg.nl) voor videobeelden van deze angiografie, zoeken op A4425.)

onrechte een lage drainproductie suggereert. Daarnaast betreft het vaak jonge patiënten die langere tijd een hypovolemie verdragen alvorens ze hemodynamisch instabiel worden. Bij 14-100% van de conservatieve behandelingen is in een later stadium alsnog een operatie noodzakelijk, bijvoorbeeld als er pleuraverdikking is door een georganiseerd hematoom of door ophoping van vocht, waardoor een restrictieve longfunctie ontstaat.<sup>1</sup>

Anderzijds is primair chirurgisch ingrijpen een optie. Thoracotomie is de eerste keus bij een hemodynamisch instabiele patiënt. Bij een hemodynamisch stabiele patiënt bij wie peroperatief het ventileren van 1 long mogelijk is, verdient video-assisted thoracic surgery in toenemende mate de voorkeur.<sup>1,2,4</sup> De voordelen van

VATS ten opzichte van thoracotomie zijn minder bloedverlies, minder postoperatieve pijnklachten, kortere drainagetijd en een kortere opnameduur.<sup>2,8</sup>

Bij onze patiënt is door middel van CT-angiografie en interventieradiologie een stabiele situatie gecreëerd, waardoor electieve VATS mogelijk werd gemaakt. Interventieradiologie is een optie wanneer de omstandigheden dit toelaten. Het visualiseren van de bloeding is niet altijd mogelijk: door een minimale bloeding of hypovolemische vasoconstrictie is de bloeding vaak niet goed af te beelden. In de literatuur wordt transarteriële embolisatie bij een spontane hemato pneumothorax als therapeutische optie nog niet gemeld. Echter, bij een hematothorax met actieve bloeding is deze optie wel beschreven.<sup>9-11</sup>

## CONCLUSIE

Een spontane hematompneumothorax is een zeldzaam maar levensbedreigend ziektebeeld. Patiënten presenteren zich vaak met een spontane pneumothorax waarbij de initiële X-thorax bij 10-30% van hen geen hydropneumothorax laat zien. Bij een spontane pneumothorax moet men daarom bedacht zijn op een spontane hematompneumothorax indien er sprake is van een onverwachte hoeveelheid bloedverlies per drain of een plotselinge klinische achteruitgang. Na initiële drainage verdient video-assisted thoracic surgery de voorkeur boven een conservatief beleid of thoracotomie. Echter, de patiënt dient daarvoor wel hemodynamisch stabiel te zijn. Indien mogelijk kan met behulp van interventieradiologie een stabiele situatie gecreëerd worden, waarna electieve VATS mogelijk is.

Belangenconflict: geen gemeld. Financiële ondersteuning: geen gemeld.

Aanvaard op 14 maart 2012

- **Indien dyspneu bij een spontane pneumothorax op de voorgrond staat, moet gedacht worden aan een spontane hematompneumothorax, zeker indien er bij drainage sanguinolent pleurvocht afloopt.**
- **Het klinisch beeld van een hematompneumothorax is verraderlijk, omdat vooral jonge patiënten in staat zijn om een hypovolemie langdurig te compenseren.**
- **De X-thorax laat bij 10-30% van de patiënten geen evidente hydropneumothorax zien.**
- **De bloeding bij een spontane hematompneumothorax ontstaat door een scheur in een gevasculariseerde bulla en onderliggend longparenchym of door een ruptuur van een eerder ontstane adhesie tussen beide pleurae.**
- **Interventieradiologie middels embolisatie kan een stabiele situatie creëren bij een hemodynamisch instabiele patiënt.**

Citeer als: Ned Tijdschr Geneeskd. 2012;156:A4425

[▶ Meer op www.ntvg.nl/klinischepraktijk](http://www.ntvg.nl/klinischepraktijk)

## LITERATUUR

- 1 Ng CS, Wong RH, Wan IY, et al. Spontaneous haemopneumothorax: current management. *Postgrad Med J*. 2011;87:630-5.
- 2 Hsu NY, Shih CS, Hsu CP, Chen PR. Spontaneous hemopneumothorax revisited: clinical approach and systemic review of the literature. *Ann Thorac Surg*. 2005;80:1859-63.
- 3 Tatebe S, Kanazawa H, Yamazaki Y, Aoki E, Sakurai Y. Spontaneous hemopneumothorax. *Ann Thorac Surg*. 1996;62:1011-5.
- 4 Homma T, Sugiyama S, Kotoh K, Doki Y, Tsuda M, Misaki T. Early surgery for treatment of spontaneous hemopneumothorax. *Scand J Surg*. 2009;98:160-3.
- 5 Hacıbrahimoglu G, Cansever L, Kocaturk CI, Aydogmus U, Bedirhan MA. Spontaneous hemopneumothorax: is conservative treatment enough? *Thorac Cardiovasc Surg*. 2005;53:240-2.
- 6 Hsu CC, Wu YL, Lin HJ, Lin MP, Guo HR. Indicators of haemothorax in patients with spontaneous pneumothorax. *Emerg Med J*. 2005;22:415-7.
- 7 Ali HA, Lippmann M, Mundathaje U, Khaleeq G. Spontaneous hemothorax: a comprehensive review. *Chest*. 2008;134:1056-65.
- 8 Chang YT, Dai ZK, Kao EL, et al. Early video-assisted thoracic surgery for primary spontaneous hemopneumothorax. *World J Surg*. 2007;31:19-25.
- 9 Berg AM, Amirbekian S, Mojibian H, Trow TK, Smith SJ, White RI Jr. Hemothorax due to rupture of pulmonary arteriovenous malformation: an interventional emergency. *Chest*. 2010;137:705-7.
- 10 Hagiwara A, Yanagawa Y, Kaneko N, et al. Indications for transcatheter arterial embolization in persistent hemothorax caused by blunt trauma. *J Trauma*. 2008;65:589-94.
- 11 Carrillo EH, Heniford BT, Senler SO, Dykes JR, Maniscalco SP, Richardson JD. Embolization therapy as an alternative to thoracotomy in vascular injuries of the chest wall. *Am Surg*. 1998;64:1142-8.
