# Supplementary material
Source: PubMed Central journal article supplement (PMC7120863)
Supplement: 978-90-368-1841-4_2_MOESM7_ESM.pdf [file 978-90-368-1841-4_2_MOESM7_ESM.pdf]

## Een incidentaloom van de bijnier bij een traumapatiënt; pleidooi voor een expectatief beleid

H.L.van Westreenen, G.A.Patijn, E.S.Sijbrandij en J.W.A.Oosterhuis

Bij een 45-jarige vrouw die als automobiliste betrokken was bij een auto-versus-auto-ongeval werd een bijnierincidentaloom vastgesteld van 5,4 cm diameter. De bijnier tumor was niet hormoonproducerend, maar gezien de grootte ervan onderging patiënte 2 maanden na het ongeval een laparoscopische adrenalectomie. Pathologisch onderzoek liet een oud hematoom zien, centraal in de rechter bijnier. Het posttraumatische hematoom van de bijnier is beschreven bij 25% van de traumapatiënten bij wie een obductie werd verricht. De meeste bijnierhematomen zijn ovaalvormig en hebben een verhoogde densiteit op CT-opnamen; de grootte en densiteit nemen af tijdens de follow-up. Een bijnierincidentaloom dat is vastgesteld tijdens traumascreening dient na 3 maanden middels CT geëvalueerd te worden. Indien de bijniermassa kleiner is geworden en er een afname van densiteit is, gaat het vrijwel zeker om een bijnierhematoom, en kan een onnodige operatie worden vermeden.

Ned Tijdschr Geneeskd. 2007;151:2723-5

Wanneer tijdens diagnostisch onderzoek van een patiënt bij wie men geen bijnierafwijking verwacht een onverwachte bijnier tumor wordt vastgesteld, wordt van een incidentaloom gesproken.<sup>1-2</sup> Deze klinisch onverwachte bijniermassa wordt steeds vaker vastgesteld door een toename van het gebruik van abdominaal beeldvormend onderzoek, zoals echografie en CT.<sup>3</sup> De prevalentie van bijnier tumoren in autopsiestudies ligt rond de 2%, maar de incidentie van het bijnierincidentaloom vastgesteld met CT varieert van 4-10%.<sup>1-3-4</sup>

Wat moet bij dergelijke toevallig ontdekte bijnier tumoren de verdere diagnostische en therapeutische strategie zijn? Men moet bepalen of de afwijking hormonaal actief is en of het gezwel goed- of kwaadaardig is. Meestal gaat het om een niet-hypersecernerend bijnieradenoom, namelijk bij 36-94% van de incidentalomen.<sup>1</sup> Indien er wél hormoonproducerende tumoren zijn, betreft het meestal feochromocytomen of cortisolproducerende adenomen, of er is primair hyperaldosteronisme. Primaire adrenocorticale carcinomen worden in 0-25% van de gevallen gerapporteerd. Het merendeel van deze tumoren betreft de grotere incidentalomen: 25% van de tumoren heeft een diameter > 6 cm.<sup>1-4</sup>

CT wordt gebruikt om de kans op maligniteit van incidentalomen te bepalen. Bij kleine tumoren met een laag aantal CT-grijswaarden, zogenaamde hounsfieldenheden (HU), is de kans op maligniteit zeer klein en is een afwach-

tend beleid gerechtvaardigd. In de huidige praktijk wordt de indicatie voor operatie gesteld bij hormonaal actieve bijnier tumoren en bij tumoren groter dan 6 cm diameter, aangezien de kans op een maligniteit bij deze laatste stijgt tot 25%.<sup>2-4</sup> Voor het bijnierincidentaloom met een diameter van 4-6 cm wordt een strikte follow-up of een adrenalectomie aanbevolen, afhankelijk van het radiologische aspect.<sup>5</sup>

### ZIEKTEGESCHIEDENIS

Patiënt A, een 45-jarige vrouw, was als automobiliste betrokken bij een hoogenenergetisch auto-versus-auto-ongeval met zijwaartse impact. Patiënte klaagde over pijn op de rechter thoraxhelft. Bij lichamelijk onderzoek werden geen afwijkingen gevonden; de zuurstofsaturatie was 99%, de bloeddruk bedroeg 150/75 mmHg en de hartfrequentie was 85/min. Oriënterend laboratoriumonderzoek toonde geen afwijkingen. Echografie van het abdomen liet een vochtcollectie rond de milt zien en een incidentaloom van de rechter bijnier met een diameter van 5 cm. Patiënte werd 2 dagen klinisch geobserveerd en er werd CT van het abdomen verricht ter analyse van het incidentaloom.

De CT-opname toonde de reeds bekende vochtcollectie rond de milt zonder aanwijzingen voor een ruptuur en een inhomogene massa die centraal in de rechter bijnier gelegen was met een diameter van 5,4 × 4,0 × 3,9 cm (40 HU) (figuur).

Na 4 weken werd patiënte endocrinologisch onderzocht. Laboratoriumonderzoek toonde de volgende waarden (referentiewaarden tussen haakjes): nuchtere serumcortisolconcentratie, na toediening van dexamethason 1 mg: 35 nmol/l (< 140); plasmametanefrineconcentratie: 418 nmol/24 h (< 1200); plasmanormetanefrineconcentratie: 1652 nmol/24 h

Isala klinieken, Postbus 10.400, 8000 GK Zwolle.  
Afd. Chirurgie: hr.dr.H.L.van Westreenen, arts in opleiding tot chirurg;  
hr.dr.G.A.Patijn en hr.dr.J.W.A.Oosterhuis (thans: VU Medisch Centrum,  
afd. Chirurgie, Amsterdam), chirurgen.  
Afd. Radiologie: mw.dr.E.S.Sijbrandij, radioloog.  
Correspondentieadres: hr.dr.H.L.van Westreenen  
(h.l.van.westreenen@isala.nl).

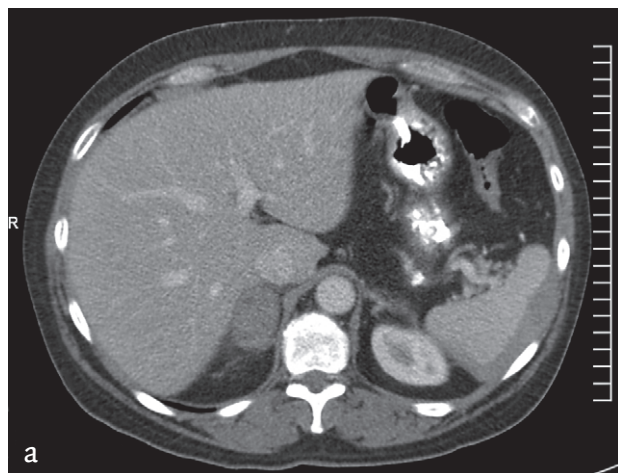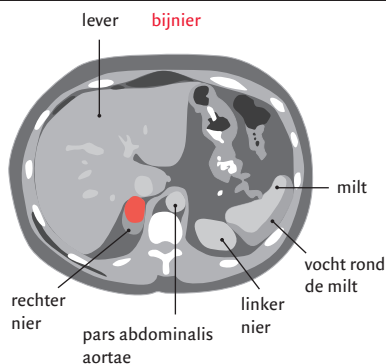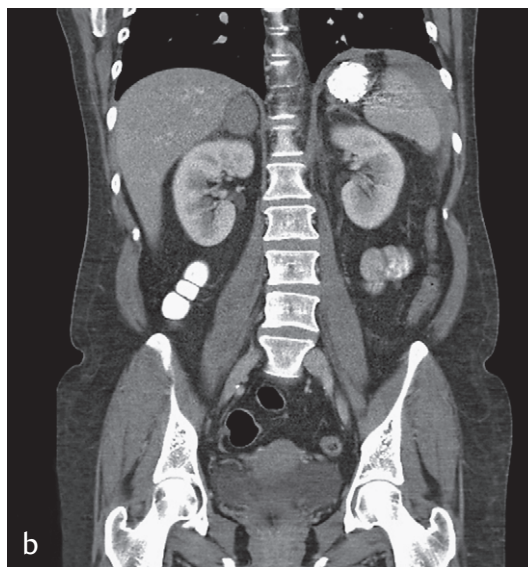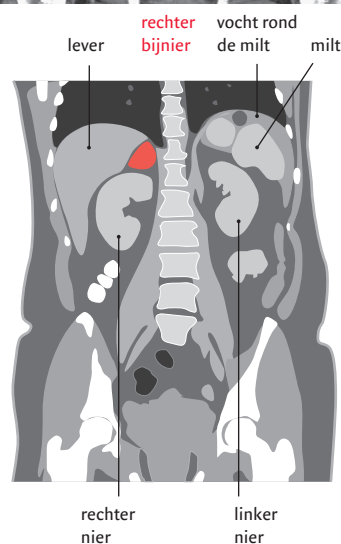

CT-snedes met contrast van het abdomen van patiënt A toont een vochtcollectie rond de milt en een bijniertumor: (a) transversale opname; (b) coronale opname.

(< 3300). Gezien de grootte van het incidentaloom en het verdere radiologische aspect onderging patiënte 2 maanden na het ongeval een laparoscopische adrenalectomie. Pathologisch onderzoek liet centraal in de rechter bijnier een oud hematoom zien met een maximale diameter van 3,5 cm, zonder aanwijzingen voor een adenoom of maligniteit. Het postoperatieve beloop was ongecompliceerd.

#### BESCHOUWING

Een posttraumatisch hematoom van de bijnier is beschreven bij 25% van de overleden patiënten met een ernstig trauma bij wie obductie werd verricht.<sup>6</sup> Het veelvuldig gebruik

van CT bij traumaonderzoek heeft de laatste jaren geleid tot een toegenomen detectie van onverwachte bijnierhematomen. Deze hematomen worden meestal veroorzaakt door een stomp buiktrauma. Indien een bijnierhematoom vastgesteld is, dient men terdege rekening te houden met andere letsels. Bijnierletsel wordt vaak gezien bij patiënten met ander begeleidend letsel, zoals een ribfractuur, een hematothorax, een pneumothorax, longcontusie en letsel van lever, milt en nieren.<sup>7 8</sup>

In een groep van 2692 traumapatiënten werden bij 51 patiënten 54 bijnierhematomen beschreven (2%), die middels CT waren gediagnosticeerd.<sup>9</sup> Deze bijnierhematomen hadden een gemiddelde diameter van 2,8 cm; bij één patiënt

was het bijnierhematoom het enige letsel. Het bijnierhematoom komt rechts vaker voor dan links. Het veronderstelde mechanisme waardoor een traumatisch hematoom van de rechter bijnier ontstaat, is compressie van de bijnier tussen de wervelkolom en de lever enerzijds en een plotse toename van de veneuze druk in de bijnier door compressie van de V. cava inferior anderzijds.<sup>9 10</sup> De meeste bijnierhematomen zijn ovaalvormig en hebben een verhoogde densiteit bij CT (50-75 HU). Indien wordt afgezien van behandeling nemen zowel de grootte als de densiteit gedurende de follow-up af.<sup>8 10</sup>

De reden dat het moeilijk is om een traumatisch bijnierhematoom zoals boven beschreven te diagnosticeren, is de toegenomen prevalentie van het incidentaloom van de bijnier. In onze casus leidden diverse overwegingen tot het verrichten van een adrenalectomie. Ten eerste was de bijniertumor de enige bevinding zonder begeleidend letsel. Ten tweede was een niet-hypersecernerend bijnieradenoom waarschijnlijker dan een hematoom, wat werd ondersteund door het radiologische aspect op de CT-scan, met name de grootte en het lage aantal HU. Door middel van een laparoscopische adrenalectomie kon een zekere diagnose worden gesteld. CT-geleide dunnenaaldaspiratie of -biopsie werd bij deze patiënt niet uitgevoerd; wij doen dit normaliter alleen wanneer er sterke aanwijzingen zijn voor een metastase.

Wij stellen voor een andere strategie te kiezen voor de evaluatie van een bijnierincidentaloom dat vastgesteld is tijdens traumascreening. De CT dient dan na 3 maanden herhaald te worden. Indien er een kleiner wordende bijniertumor wordt gezien met een afname van de densiteit gaat het vrijwel zeker om een bijnierhematoom en kan een onnodige operatie worden vermeden. Alle andere incidentalomen dienen volgens de daartoe bestaande richtlijnen te worden geëvalueerd.<sup>4</sup>

Belangenconflict: geen gemeld. Financiële ondersteuning: geen gemeld.

Aanvaard op 23 mei 2007

---

## Literatuur

- 1 Brunt LM, Moley JF. Adrenal incidentaloma. *World J Surg.* 2001;25:905-13.
- 2 Bruijne ELE de, Burgmans JPJ, Krestin GP, Pols HAP, Meiracker AH van den, Herder WW de. Het incidentaloom van de bijnier: een klinisch probleem van beeldvorming. *Ned Tijdschr Geneesk.* 2005;149:1821-6.
- 3 Luton JP, Martinez M, Coste J, Bertherat J. Outcome in patients with adrenal incidentaloma selected for surgery: an analysis of 88 cases investigated in a single clinical center. *Eur J Endocrinol.* 2000;143:111-7.
- 4 Grumbach MM, Biller BM, Braunstein GD, Campbell KK, Carney JA, Godley PA, et al. Management of the clinically inapparent adrenal mass ('incidentaloma'). *Ann Intern Med.* 2003;138:424-9.
- 5 Brunaud L, Kebebew E, Sebag F, Zarnegar R, Clark OH, Duh QY. Observation or laparoscopic adrenalectomy for adrenal incidentaloma? A surgical decision analysis. *Med Sci Monit.* 2006;12:CR355-62.
- 6 Sevitt S. Post-traumatic adrenal apoplexy. *J Clin Pathol.* 1955;8:185-94.
- 7 Oto A, Ozgen B, Akhan O, Besim A. Delayed posttraumatic adrenal hematoma. *Eur Radiol.* 2000;10:903-5.
- 8 Sinelnikov AO, Abujudeh HH, Chan D, Novelline RA. CT manifestations of adrenal trauma: experience with 73 cases. *Emerg Radiol.* 2007;13:313-8.
- 9 Rana AI, Kenney PJ, Lockhart ME, McGwin jr G, Morgan DE, Windham 3rd ST, et al. Adrenal gland hematomas in trauma patients. *Radiology.* 2004;230:669-75.
- 10 Ikeda O, Urata J, Araki Y, Yoshimatsu S, Kume S, Torigoe Y, et al. Acute adrenal hemorrhage after blunt trauma. *Abdom Imaging.* 2007;32:248-52.

---

## Abstract

**An adrenal incidentaloma in a trauma patient; a plea for expectant management.** – An adrenal incidentaloma was detected in 45-year-old female driver after a car-versus-car collision. The mass, which had a diameter of 5.4 cm, was not a hormone-producing tumour, but because of its size laparoscopic adrenalectomy was performed 2 months later. Pathology examination revealed an old haematoma situated centrally in the right adrenal gland. Posttraumatic adrenal haematoma is found in 25% of autopsies of traumatized patients. Most adrenal haematomas have an ovoid appearance on CT and have a slight hyperattenuation. Follow-up CT of an adrenal haematoma shows a decrease in size and attenuation. It is therefore proposed that adrenal incidentalomas detected during trauma screening should be evaluated by repeating CT after 3 months. If the mass has diminished and its density decreased, it is most probably an adrenal haematoma, in which case unnecessary surgery may be avoided. *Ned Tijdschr Geneesk.* 2007;151:2723-5
