# Supplementary material
Source: PubMed Central journal article supplement (PMC7120863)
Supplement: 978-90-368-1841-4_2_MOESM8_ESM.pdf [file 978-90-368-1841-4_2_MOESM8_ESM.pdf]

## Het incidentaloom van de bijnier: een klinisch probleem van beeldvorming

E.L.E.de Bruijne, J.P.J.Burgmans, G.P.Krestin, H.A.P.Pols, A.H.van den Meiracker en W.W.de Herder

Dames en Heren,  
Beeldvormend diagnostisch onderzoek vindt in toenemende mate plaats. Door de frequente toepassing van echografie, CT en MRI wordt de clinicus regelmatig geconfronteerd met toevallsbevindingen, zogenaamde incidentalomen.<sup>1</sup> Incidentalomen van de bijnier vormen een medisch probleem waarbij discussie bestaat over het te voeren beleid. In deze klinische les bespreken wij aan de hand van twee patiënten het te volgen beleid bij het bijnierincidentaloom.

Patiënt A, een 68-jarige vrouw, bezocht de polikliniek Chirurgie nadat zij kortdurend een periode doorgemaakt had van pijnklachten in de rechter onderbuik die uitstraalden naar de rechter flank. De voorgeschiedenis vermeldde een herseninfarct en angina pectoris. Bij lichamelijk onderzoek had patiënte geen afwijkingen; haar bloeddruk bedroeg 160/66 mmHg. Als medicatie gebruikte zij diltiazem, simvastatine en carbasalaatcalcium. Oriënterend laboratoriumonderzoek van het bloed toonde geen afwijkingen. Het urinesediment was niet afwijkend. Echografie van het abdomen toonde een vergrote bijnier links. Aanvullend werd een CT-scan gemaakt zonder en met intraveneus contrastmiddel, waarbij een 4 cm grote, scherp afgrensbaare tumor werd gevonden van de linker bijnier met een röntgenverzwakking van 8 Hounsfield-units (HU) op de blanco CT-opname (figuur 1). Haar buikpijnklachten verdwenen spontaan na echografie van het abdomen.

Laboratoriumonderzoek naar het functioneren van het incidentaloom toonde de volgende waarden (referentiewaarden tussen haakjes): plasma-aldosteron: 65 pg/ml (50-250); plasmarenine: 17,3 µU/ml (15-45); nuchter serumcortisol, na toediening van 1 mg dexamethason: 40 nmol/l (< 140); plasmanoradrenaline: 284 pg/ml (100-600); en plasma-adrenaline 4 pg/ml (10-100). Uitscheiding van (nor)metanefrine in de urine was evenmin afwijkend. De 24-uurs-cortisolurie bedroeg gemiddeld 450 nmol (< 850). Concluderend betrof het een niet-hyperfunctioneel incidentaloom

van de linker bijnier van 4 cm met een radiologisch benigne aspect.

Wegens de grootte van de bijnier tumor werd toen gekozen voor een adrenalectomie. Patiënte onderging een ongecompliceerde endoscopische retroperitoneale adrenalectomie. Histologisch onderzoek toonde een bijnierschorsadenoom. Patiënte werd na de eerste postoperatieve poliklinische controle terugverwezen naar haar huisarts.

Patiënt B, een 67-jarige vrouw, werd naar ons ziekenhuis overgeplaatst vanwege een recidiefpyelonefritis bij dubbelzijdige nierstenen. Zij was sinds 4 jaar bekend wegens een insulineafhankelijke diabetes mellitus met micro- en macrovasculaire afwijkingen die zich uitte als retinopathie en perifeer arterieel vaatlijden. Zij was 3 maanden tevoren elders opgenomen geweest wegens een urosepsis, waarvoor zij langdurig antibiotica (ofloxacin) gebruikte. De overige medicatie bestond uit insuline, acetylsalicylzuur en ascorbinezuur. Bij lichamelijk onderzoek had patiënte een bloeddruk van 140/80 mmHg, geen koorts en de regio ter plaatse van de nierloges was gevoelig. Echografie van de nieren toonde beiderzijds koraalstenen en rechts dilatatie van het bekken-kelkensysteem en de ureter. Het rechter pyelum werd percutaan gedraineerd. Vanwege toenemende pijn in de rechter flank werd een CT van het abdomen verricht. Deze toonde een perirenaal gelegen hematoom ter hoogte van de rechter nier en als toevallsbevinding een vergrote rechter bijnier van 21 bij 27 mm, met inhomogene aankleuring en een röntgenverzwakking van > 20 HU op de CT-scan zonder intraveneus contrastmiddel (figuur 2, de getoonde foto is gemaakt na evacuatie en resolutie van het perirenaal hematoom). Het hematoom werd geëvacueerd en er vond een nefrolithotomie rechts plaats, waarbij 3 stenen werden verwijderd. Het postoperatief beloop was ongecompliceerd.

Aanvullend laboratoriumonderzoek toonde een plasma-aldosteronconcentratie van 21 pg/ml, een plasmarenineconcentratie van 4,2 µU/ml en een nuchtere serumcortisolconcentratie na toediening van 1 mg dexamethason van 75 nmol/l. De 24-uurscortisolurie bedroeg 370 nmol. De concentratie van noradrenaline en adrenaline in plasma was normaal, maar de urine bevatte bij herhaling een verhoogde concentratie van afbraakproducten van catecholaminen met een metanefrine-creatinineratio van 730 µmol/mol (35-150) en normetanefrine-creatinineratio van 383 µmol/mol (60-260) (gemiddelde van 2 bepalingen). Een

Erasmus MC, Rotterdam.

Afd. Inwendige Geneeskunde: hr.E.L.E.de Bruijne, internist (per 1 september 2005; internist-vasculair geneeskundige, Rode Kruis Ziekenhuis, afd. Interne Geneeskunde, Postbus 1074, 1940 EB Beverwijk); hr.prof. dr.H.A.P.Pols en hr.dr.W.W.de Herder, internisten-endocrinologen; hr.dr. A.H.van den Meiracker, internist-vasculair geneeskundige.

Afd. Algemene Heelkunde: mw.J.P.J.Burgmans, chirurg.

Afd. Radiologie: hr.prof.dr.G.P.Krestin, radioloog.

Correspondentieadres: hr.E.L.E.de Bruijne.

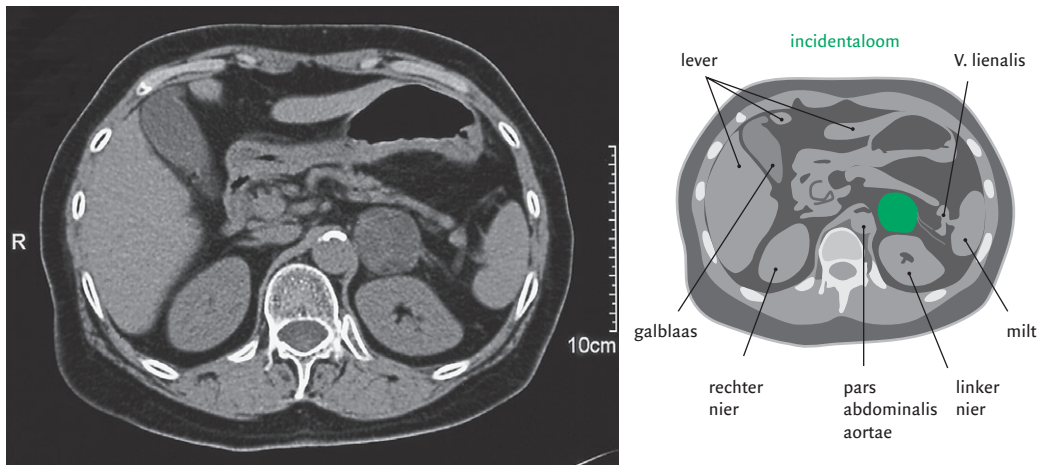

FIGUUR 1. Transversale CT-scan zonder contrastmiddel van het abdomen van patiënt A met een incidentaloom van de linker bijnier.

MRI van de bijnieren liet op de  $T_2$ -gewogen opname zonder intraveneus contrastmiddel het beeld zien van een perirenaal gelegen hematoom rechts en een vergrote rechter bijnier met een signaalintensiteit gelijk aan nierweefsel (figuur 3) en een verhoogde signaalintensiteit op de  $T_1$ -gewogen opname met ringvormige aankleuring na toediening van intraveneus contrastmiddel (figuur 4), wat duidelijk niet paste bij een adenoom. Concluderend was er een bijnier-massa rechts, berustend op een feochromocytoom.

Patiënte werd preoperatief voorbereid met de  $\alpha$ -adrenerge receptorblokker fenoxymetazine (een middel dat

in Nederland niet meer geregistreerd is) en onderging een transperitoneale endoscopische adrenalectomie van de rechter bijnier, die ongecompliceerd verliep. Histologisch onderzoek toonde een feochromocytoom. Patiënte presenteerde zich 2 jaar na de adrenalectomie met een gemetastaseerde maligniteit van de tractus digestivus, waarvoor zij palliatieve chemotherapie onderging.

Een bijnierincidentaloom wordt gedefinieerd als een bijniermassa met een doorsnede groter dan 1 cm, die wordt gevonden tijdens beeldvormende diagnostiek van het abdo-

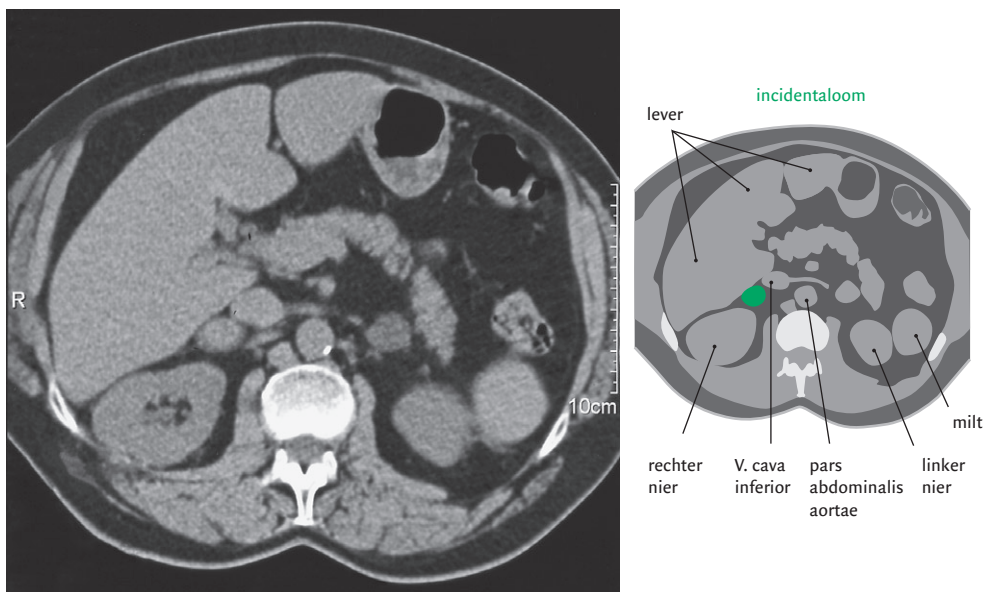

FIGUUR 2. Transversale CT-scan zonder contrastmiddel van het abdomen van patiënt B met een incidentaloom van de rechter bijnier.

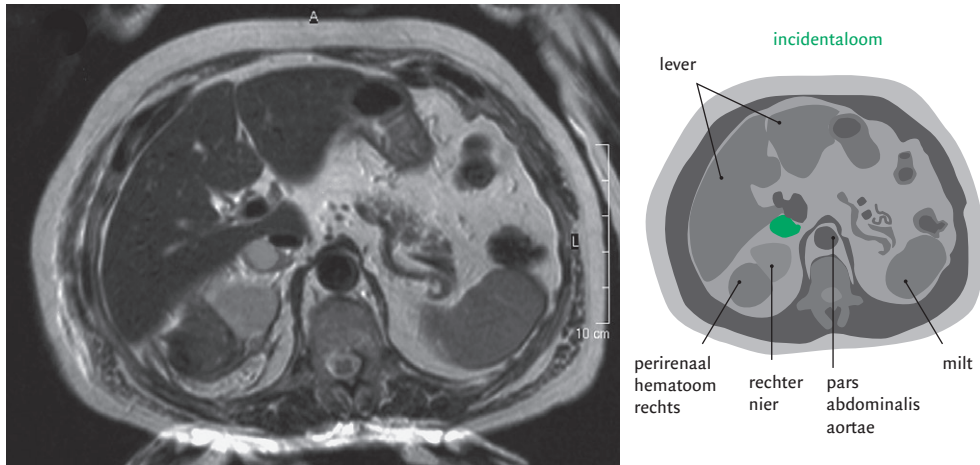

FIGUUR 3. Transversale MRI van de bijnieren op de T<sub>2</sub>-gewogen opname zonder contrastmiddel van patiënt B met een perirenaal gelegen hematoom rechts en een incidentaloom van de rechter bijnier met een signaalintensiteit gelijk aan nierweefsel.

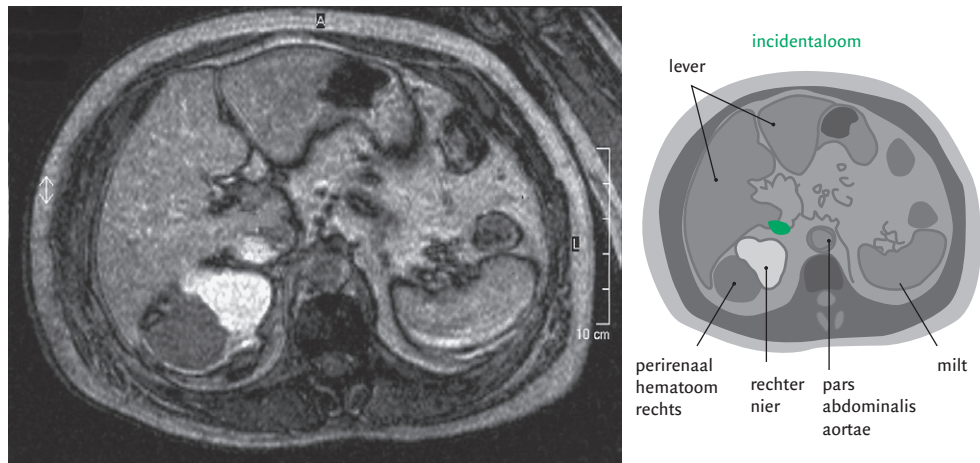

FIGUUR 4. Transversale MRI van de bijnieren op de T<sub>1</sub>-gewogen opname na intraveneuze toediening van contrastmiddel aan patiënt B met een perirenaal gelegen hematoom rechts en een incidentaloom van de rechter bijnier met verhoogde signaalintensiteit door sterke aankleuring, duidelijk niet passend bij een adenoom.

men in verband met klachten die niet gerelateerd zijn aan de bijnierfunctie of -lokalisatie.<sup>2</sup> De gerapporteerde prevalentie van het bijnierincidentaloom tijdens CT-onderzoek varieert van 1,4 tot 4,4% en neemt toe met de leeftijd, met een piek rond het 50e-60e levensjaar.<sup>2,3</sup>

**Differentiaaldiagnostiek.** De differentiaaldiagnose van een bijnierincidentaloom is onder te verdelen in: een autonome of hyperfunctionerende massa, een benigne niet-functionele of een maligne niet-functionele massa, of een pseudo-adrenale massa (tabel). Bij het vinden van een bijnierincidentaloom moet altijd onderzoek worden verricht naar het functioneren en naar eventuele maligniteit. Ongeveer

15% van de bijnierincidentalomen is functioneel.<sup>4</sup> In volgorde van frequentie van voorkomen kan onderscheid worden gemaakt in cortisolproducerende adenomen (5-8%), feochromocytomen (4-5%), steroidhormoonproducerende of precursors van steroidhormoonproducerende bijnierschorscarinomen (4%) en aldosteronomen (1%).<sup>3,4</sup>

**Functionele versus niet-functionele incidentalomen.** Een cortisolproducerend bijnierincidentaloom leidt meestal tot een subklinisch Cushing-syndroom, dat wil zeggen autonome cortisolsecretie, maar het klassieke Cushing-beeld ontbreekt. Wel kunnen obesitas, hypertensie, diabetes mellitus en/of osteoporose geïsoleerd voorkomen. De suppressietest

Differentiaaldiagnostiek van een bijnierincidentaloorn

| autonoom functionerende of hyperfunctionerende massa | niet-functionele massa                                       |                        |                       |
|------------------------------------------------------|--------------------------------------------------------------|------------------------|-----------------------|
|                                                      | benigne                                                      | maligne                | pseudo-adrenale massa |
| (subklinisch) Cushing-syndroom                       | adenoom                                                      | angiosarcoom           | technisch artefact    |
| feochromocytoom                                      | adenolipoom                                                  | ganglioneuroblastoom   | vaatkluwen            |
| bijnierschorscarcinoom                               | amyloïdose                                                   | leiomyosarcoom         | lever                 |
| primair hyperaldosteronisme                          | cyste                                                        | maligne schwannoom     | lymfeklier            |
| congenitale bijnierhyperplasie                       | ganglioneuroom                                               | metastase              | pancreasmassa         |
| nodulaire bijnierschorshyperplasie                   | granuloom                                                    | bijnierschorscarcinoom | (bij)milt             |
|                                                      | hamartoom                                                    |                        | maagmassa             |
|                                                      | hemangioom                                                   |                        |                       |
|                                                      | hematoom                                                     |                        |                       |
|                                                      | leiomyoom                                                    |                        |                       |
|                                                      | lipoom                                                       |                        |                       |
|                                                      | myelolipoom                                                  |                        |                       |
|                                                      | neurofibroom                                                 |                        |                       |
|                                                      | pseudo-cyste                                                 |                        |                       |
|                                                      | teratoom                                                     |                        |                       |
|                                                      | infectie (tuberculose, schimmel-<br>infectie, echinokokkose) |                        |                       |

met 1 mg dexamethason is bij het subklinisch Cushing-syndroom per definitie gestoord, terwijl de cortisolsecretie in de 24-uursurine vaak binnen de norm is.<sup>3,5</sup>

Een bijnierincidentaloorn berustend op een feochromocytoom is klinisch meestal asymptomatisch. De biochemische diagnostiek berust in de meeste klinieken op de bepaling in de urine van metanefrine en normetanefrine, de afbraakproducten van respectievelijk adrenaline en noradrenaline. De sensitiviteit van deze bepaling ligt rond de 95%. Als alternatief, met een vergelijkbare of nog hogere sensitiviteit, maar beperkt beschikbaar, kan de vrije concentratie van adrenaline en noradrenaline of de vrije concentratie van metanefrine en normetanefrine in plasma bepaald worden.<sup>6</sup>

Een aldosteronoom gaat altijd gepaard met een verhoogde bloeddruk, terwijl de serumkaliumconcentratie in ongeveer 50% van de gevallen verlaagd is.<sup>4</sup> Diagnostiek, door middel van bepaling van ochtendplasma-aldosteron- en de plasmarenineconcentratie of plasmarenineactiviteit (afgenomen onder gestandaardiseerde omstandigheden),<sup>7</sup> is derhalve alleen geïndiceerd bij aanwezigheid van hypertensie en/of hypokaliëmie.<sup>5</sup> Zoals reeds eerder beschreven in dit tijdschrift, heeft een gesupprimeerde plasmarenine-waarde (in het algemeen < 15 µU/ml) in combinatie met een verhoogde plasma-aldosteronconcentratie (in het algemeen > 200 pg/ml) een hoge sensitiviteit en specificiteit voor het aantonen van een aldosteronoom.<sup>7</sup>

De frequentst voorkomende niet-hyperfunctionele incidentalomen zijn het bijnierschorsadenoom en de bijniermetastase. Indien een incidentaloorn wordt gevonden bij een patiënt met een bekende maligniteit, betreft dit in een-

derde tot driekwart van de gevallen een metastase.<sup>3</sup> Een bijnierschorscarcinoom of een bijniermetastase is veelal groter dan 3 cm en metastasen komen vaak bilateraal voor.

**Benigne versus maligne.** Grootte en bepaalde karakteristieken van het incidentaloorn bij CT- en/of MRI-onderzoek worden gebruikt om te differentiëren tussen benigne en maligne massa's. De maximale diameter van het incidentaloorn heeft een sterk voorspellende waarde voor maligniteit. Uit een grote patiëntengroep bleek dat bij een diameter < 4 cm de kans op een bijnierschorscarcinoom 2% is, terwijl deze kans stijgt tot 25% bij een diameter > 6 cm.<sup>5</sup> In de literatuur wordt veelal een arbitraire grenswaarde van de tumordiameter van 4 cm aangehouden om te besluiten tot resectie.<sup>4,5</sup> Bij deze grenswaarde is de sensitiviteit voor de detectie van een carcinoom 93% bij een specificiteit van 42%.<sup>4</sup> Voor de praktijk betekent het aanhouden van deze grenswaarde dat 12 patiënten met een bijnierincidentaloorn geopereerd moeten worden om bij 1 van hen een maligniteit te verwijderen.<sup>4,8</sup>

Het aspect van de tumor bij CT of MRI is medebepalend voor het inschatten van de kans op maligniteit. Een bijnieradenoom heeft een homogeen aspect en is goed afgrensbaar. Bijnieradenomen zijn rijk aan intracytoplasmatische lipiden en zijn weinig waterhoudend, terwijl een carcinoom of een metastase van de bijnier arm is aan lipiden ten gevolge van tumorinvasie en ingroei van bloedvaten. Na toediening van intraveneus contrastmiddel laat CT- of MRI-beeldvorming weinig aankleuring van een bijnieradenoom zien, met een snelle uitwas van contrastmiddel, terwijl een carcinoom of een metastase van de bijnier een sterke aankleuring geeft met een trage uitwas van contrastmiddel.<sup>3,9</sup> Een

primair bijniercarcinoom is bij beeldvormend onderzoek meestal inhomogeen, met een grillige contour en kan tekenen tonen van lokale invasieve groei en/of lymfadenopathie. Het beeld van cysten, myelolipomen en bloedingen is dusdanig karakteristiek dat de diagnose met CT en/of MRI gesteld kan worden.<sup>9</sup>

Tenslotte is het met CT- en MRI-technieken mogelijk informatie over weefselsamenstelling te krijgen. Een gestandaardiseerde meting van de absorptie van röntgenstralen, bekend als de CT-röntgenverzwakking, uitgedrukt in HU op een CT-scan zonder intraveneus contrastmiddel, kan helpen bij het differentiëren tussen een benigne en een maligne afwijking.<sup>3,9</sup> Adenomen zijn vetrijk en vet heeft een HU-waarde onder de 0. Bij een HU-waarde tot 10 HU is er vrijwel altijd sprake van een adenoom. De meeste carcinoomen hebben een HU groter dan 18, maar ook een aantal vetarme adenomen kunnen een röntgenverzwakking van > 15 HU hebben. Aan de andere kant worden adenomen op een CT-scan in het algemeen gekenmerkt door een snelle uitwas van een intraveneus toegediend geïodiseerd contrastmiddel. Een CT-scanopname 15 min na toediening van contrastmiddel heeft een goed tot uitstekend testresultaat om te differentiëren tussen non-adenomen en adenomen (sensitiviteit 95% en specificiteit 98%). Deze techniek kan gebruikt worden indien een CT-scan zonder contrastmiddel een röntgenverzwakking geeft van  $\geq 10$  HU.

Een adenoom vertoont, in tegenstelling tot een carcinoom, een signaalverlies tijdens de heel lipidegevoelige 'chemical-shift-imaging'-MRI. Op de T<sub>2</sub>-gewogen afbeelding is de intensiteit van een adenoom in driekwart van de gevallen gelijk aan die van de lever.<sup>9</sup> Feochromocytomen zijn meestal hyperintens ten opzichte van de lever op de T<sub>2</sub>-gewogen afbeelding.<sup>10</sup> MRI en CT hebben een gelijkwaardige diagnostische accuratesse voor het onderscheiden tussen benigne en maligne afwijkingen.

De indicatie voor CT-geleide dunnaaldaspiratie bij een incidentaloom is beperkt. Cytologisch onderzoek van het punctaat kan alleen bijnierweefsel van niet-bijnierweefsel onderscheiden en dunnaaldaspiratie heeft dus geen waarde voor de differentiatie tussen bijnieradenoom en -carcinoom. Het onderzoek is soms van waarde bij patiënten met een bekende maligniteit en geen aanwijzingen voor metastasen elders en een heterogene massa > 20 HU, omdat dan zowel de primaire tumor als de bijnier met metastase kan worden verwijderd. Voordat tot punctie wordt overgegaan, dient een feochromocytoom te worden uitgesloten.<sup>5</sup>

**Beleid bij een bijnierincidentaloom.** Bij een functioneel unilateraal bijnierincidentaloom is chirurgische resectie geïndiceerd in geval van een feochromocytoom of hypercortisolisme, dat zich uit in autonome cortisolproductie (figuur 5). Ook bij een aldosteronoom wordt meestal tot resectie overgegaan. Bij een niet-functioneel bijnierincidentaloom is het beleid afhankelijk van de radiologische gegevens, zoals

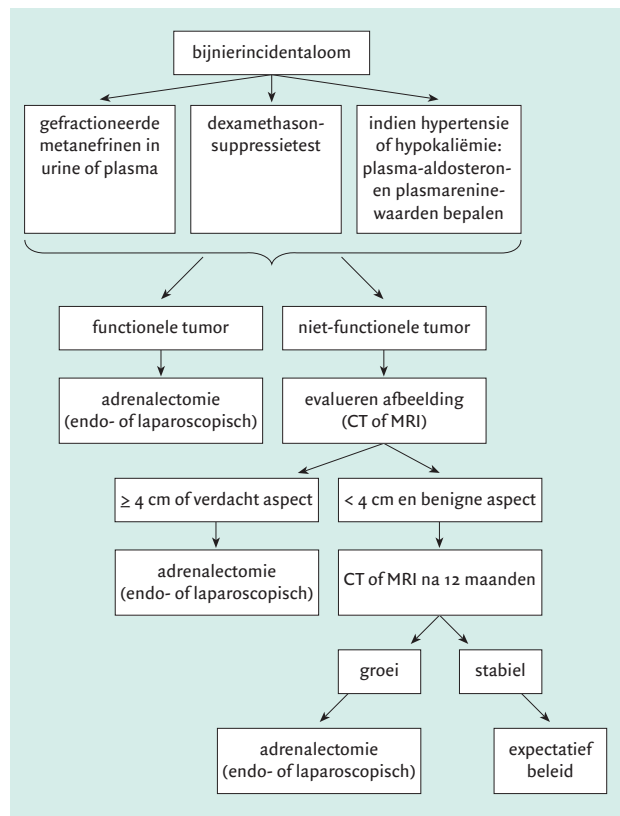

FIGUUR 5. Stroomdiagram van het beleid bij een patiënt met een bijnierincidentaloom.

besproken. Iedere patiënt met een bijniermassa kleiner dan 4 cm met benigne kenmerken moet tenminste 1 maal gecontroleerd worden. Over de frequentie en de duur van de follow-up bestaat nog veel discussie. Ons advies is om na 12 maanden een CT te herhalen en indien de bijniermassa geen groei vertoont en benigne kenmerken heeft, is verdere follow-up niet noodzakelijk. Onderzoek laat zien dat slechts 8% van de kleinere incidentalomen die gedurende ruim 4 jaar werden gevolgd, groei vertoonde, 1,3% werd kleiner en bij geen van de afwijkingen werd een maligniteit geconstateerd.<sup>11</sup> Ook de kans dat een niet-functionele tumor in de loop van de tijd functioneel wordt, blijkt bijzonder klein te zijn.<sup>12</sup>

**Patiënt A en B.** Patiënt A had een niet-functioneel incidentaloom van de linker bijnier van 4 cm met een benigne aspect op de CT-scan. Bij deze patiënte is wegens (systolische) hypertensie ook onderzoek verricht naar een aldosteronoom. Vanwege de grootte van de tumor werd, ondanks het benigne aspect, toen gekozen voor een adrenalectomie, waarbij het histologisch onderzoek een bijnieradenoom opleverde. Tegenwoordig controleren wij een bijniermassa tot 4 cm met beeldvormende techniek en wordt er alleen ge-

opereerd bij hyperfunctioneren of bij maligne kenmerken (zie figuur 5).

Bij patiënt B was de concentratie in de urine van met name metanefrine 5 maal verhoogd, waarmee de diagnose 'adrenalineproducerend feochromocytoom' vaststond. Een feochromocytoom moet altijd verwijderd worden vanwege de kans op een hypertensieve crisis of een fatale ritmestoornis en vanwege de mogelijkheid van maligniteit.<sup>4</sup> Bij deze patiënte was onterecht – want zij had geen hypertensie of hypokaliëmie – onderzoek verricht naar een aldosteronoom.

Dames en Heren, in de klinische praktijk worden wij door het frequente gebruik van beeldvormend onderzoek van het abdomen regelmatig geconfronteerd met de toevallsbevinding van een bijnierincidentaloom. Meestal kan op grond van het kenmerkende radiologische beeld een diagnose gesteld worden. Vaak is de precieze aard van de afwijking onduidelijk en moet gericht onderzoek plaatsvinden naar het functioneren en naar eventuele maligniteit. Op grond van wat momenteel in de literatuur bekend is, vindt de diagnostiek bij patiënten met een bijnierincidentaloom in het Erasmus MC te Rotterdam plaats volgens het stroomdiagram weergegeven in figuur 5.

Belangenconflict: geen gemeld. Financiële ondersteuning: geen gemeld.

Aanvaard op 20 mei 2005

---

#### Literatuur

- 1 Hermus A. De bij toeval gevonden bijniertumor: incidentaloom van de bijnier. *Ned Tijdschr Geneeskd* 1994;138:1701-5.
- 2 Osella G, Terzolo M, Borretta G, Magro G, Alí A, Piovesan A, et al. Endocrine evaluation of incidentally discovered adrenal masses (incidentalomas). *J Clin Endocrinol Metab* 1994;79:1532-9.

- 3 Mansmann G, Lau J, Balk E, Rothberg M, Miyachi Y, Bornstein SR. The clinically inapparent adrenal mass: update in diagnosis and management. *Endocr Rev* 2004;25:309-40.
- 4 Mantero F, Terzolo M, Arnaldi G, Osella G, Masini AM, Alí A, et al. A survey on adrenal incidentaloma in Italy. *J Clin Endocrinol Metab* 2000;85:637-44.
- 5 Grumbach MM, Biller BM, Braunstein GD, Campbell KK, Carney JA, Godley PA, et al. Management of the clinically inapparent adrenal mass ('incidentaloma'). *Ann Intern Med* 2003;138:424-9.
- 6 Lenders JW, Pacak K, Walther MM, Linehan WM, Mannelli M, Friberg P, et al. Biochemical diagnosis of pheochromocytoma: which test is best? *JAMA* 2002;287:1427-34.
- 7 Meiracker AH van den, Deinum J. Primair hyperaldosteronisme. *Ned Tijdschr Geneeskd* 2003;147:1580-5.
- 8 Aron DC. The adrenal incidentaloma: disease of modern technology and public health problem. *Rev Endocr Metab Disord* 2001;2:335-42.
- 9 Dunnick NR, Korobkin M. Imaging of adrenal incidentalomas: current status. *AJR Am J Roentgenol* 2002;179:559-68.
- 10 Bravo EL, Tagle R. Pheochromocytoma: state-of-the-art and future prospects. *Endocr Rev* 2003;24:539-53.
- 11 Barzon L, Scaroni C, Sonino N, Fallo F, Paoletta A, Boscaro M. Risk factors and long-term follow-up of adrenal incidentalomas. *J Clin Endocrinol Metab* 1999;84:520-6.
- 12 Barzon L, Fallo F, Sonino N, Boscaro M. Development of overt Cushing's syndrome in patients with adrenal incidentaloma. *Eur J Endocrinol* 2002;146:61-6.

---

#### Abstract

**Adrenal incidentaloma: a clinical problem related to imaging.** – Two female patients, 68 and 67 years of age, were referred for right abdominal pain and pyelonephritis, respectively. During the diagnostic work-up, an unsuspected adrenal mass was found in both patients. Hormonal evaluation and imaging showed a benign non-hyperactive functioning adenoma in one patient and a pheochromocytoma in the other. Both patients were successfully treated with endoscopic adrenalectomy. Wider application and improvement of abdominal imaging procedures have caused an increase of incidentally detected adrenal masses, posing a common clinical problem. Typically, a diagnosis can be made on the basis of the characteristic radiological image. The exact nature of the defect is often unclear and further evaluation is required to determine functionality and possible malignancy. An algorithm is presented for the management of adrenal incidentalomas. *Ned Tijdschr Geneeskd* 2005;149:1821-6
