# Supplementary material
Source: PubMed Central journal article supplement (PMC7120863)
Supplement: 978-90-368-1841-4_2_MOESM9_ESM.pdf [file 978-90-368-1841-4_2_MOESM9_ESM.pdf]

## Vier patiënten met een incidentaloom van de schildklier bij fluor-18-deoxyglucose-positronemissietomografie (FDG-PET)

M.J.Noordzij, L.J.M.de Heide, T.P.Links, P.L.Jager en B.H.R.Wolffenbuttel

Bij 4 patiënten werd een incidentaloom van de schildklier gevonden via fluor-18-deoxyglucose-positronemissietomografie (FDG-PET). Bij de eerste patiënt, een 73-jarige man, werd een medullair schildklier carcinoom ontdekt tijdens onderzoek ter stadiëring van een larynxcarcinoom. De tweede patiënt, een 81-jarige vrouw, bleek bij evaluatie van een haard in de long een folliculair schildklier carcinoom te hebben. Bij de derde patiënt, een 64-jarige vrouw, werd een papillair schildklier carcinoom gevonden tijdens disseminatieonderzoek na curatieve resectie van een bijnierschorscarcinoom. De vierde patiënt, een 78-jarige man, had een schildklierincidentaloom op de FDG-PET-scan die was gemaakt ter stadiëring van een recidief van een gastro-intestinale stromaceltumor. Bij 1,2-2,3% van de FDG-PET-scans wordt een incidentaloom van de schildklier gevonden. Hierbij bedraagt het risico op maligniteit van de schildklier tot 50%. Daarom is verder onderzoek middels cytologische punctie geïndiceerd wanneer er een dergelijke schildklierafwijking op de FDG-PET-scan wordt gevonden. Samen met de patiënt moet de arts afwegen wat het nut van verder onderzoek en van een behandeling is in relatie tot de oorspronkelijke ziekte waarvoor de FDG-PET werd verricht.

Ned Tijdschr Geneeskd. 2007;151:2337-41

Met het toenemend gebruik van afbeeldingstechnieken zoals echografie, CT en MRI neemt het aantal toevallsbevindingen toe. Als het gaat om afwijkingen in de bijniere, de schildklier of de hypofyse spreekt men van incidentalomen. Fluor-18-deoxyglucose-positronemissietomografie (FDG-PET) is een nieuwe afbeeldingstechniek die steeds vaker gebruikt wordt, vooral in de oncologie. Met deze techniek worden regelmatig schildklierincidentalomen gevonden. Het beleid hierbij vereist complexe overwegingen, zoals geïllustreerd wordt in de navolgende 4 ziektegeschiedenissen.

### ZIEKTEGESCHIEDENISSEN

Bij patiënt A, een 73-jarige man, werd CT verricht voor stadiëring van een larynxcarcinoom. Er werd een hypodense afwijking van 5 mm diameter gevonden in de rechter schildklierkwab, die op de aanvullende FDG-PET-scan hoge activiteit liet zien (figuur 1). De schildkliernodus was niet palpabel. Bij echogeleide cytologische punctie werden atypische epitheelcellen gevonden, die bij immunohistochemisch onderzoek positief kleurden op calcitonine. De se-

rumconcentratie van calcitonine was 62 ng/l (referentiewaarde: < 3). Omdat aan een medullair schildklier carcinoom werd gedacht, werd een totale thyreoïdectomie met dissectie van het centrale compartiment verricht. Bij histopathologisch onderzoek werd een medullair schildklier carcinoom van 8 mm diameter in de rechter schildklierkwab gevonden, zonder C-celhyperplasie in het overige schildklierweefsel en zonder lymfogone metastasering. Postoperatief daalde de calcitonineconcentratie tot 0,1 ng/l. Het larynxcarcinoom werd behandeld met radiotherapie. Bij follow-up 2 jaar na de behandeling was de patiënt klachtenvrij en waren er geen aanwijzingen voor een recidief van larynx- of schildklier carcinoom.

Patiënt B was een 81-jarige vrouw bij wie FDG-PET-scintigrafie werd verricht ter analyse van een longhaard in de rechter onderkwab. Naast toegenomen opname in de longafwijking werd er ook een diffuus sterk toegenomen opname in de gehele schildklier gezien (figuur 2). Sinds 7 jaar was zij bekend wegens een multinodulair struma. Cytologische punctie van de schildklier toonde rechts een folliculaire proliferatie, links nodulaire hyperplasie. Een CT-geleide punctie van de longhaard liet een cytologisch en immunohistochemisch beeld zien passend bij een primair adenocarcinoom van de long. De kleuring op thyreoglobuline was negatief. Via een lobectomie van de rechter onderkwab werd een primair adenocarcinoom van de long verwijderd met als stadium pT1NoMo. De op dit materiaal uitgevoerde thyreoglobulinekleuring was eveneens negatief.

Aanvankelijk voelde patiënte weinig voor een schildklier-

Medisch Centrum Leeuwarden, afd. Interne Geneeskunde, Henri Dunantweg 2, 8934 AD Leeuwarden.

Mw.M.J.Noordzij, arts in opleiding tot internist; hr.L.J.M.de Heide, internist-endocrinoloog.

Universitair Medisch Centrum Groningen, Groningen.

Afd. Endocrinologie: mw.dr.T.P.Links en hr.prof.dr.B.H.R.Wolffenbuttel, internisten-endocrinologen.

Afd. Nucleaire Geneeskunde: hr.dr.P.L.Jager, nucleair-geneeskundige.

Correspondentieadres: hr.L.J.M.de Heide (l.de.heide@znb.nl).

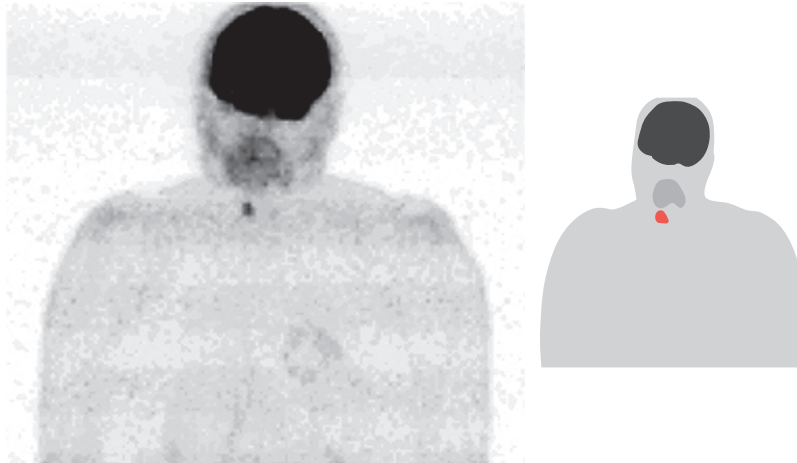

FIGUUR 1. Frontaal aanzicht van een fluor-18-deoxyglucose-positronemissietomografie(FDG-PET)-scan van patiënt A, met een kleine haardvormige aankleuring in de schildklier.

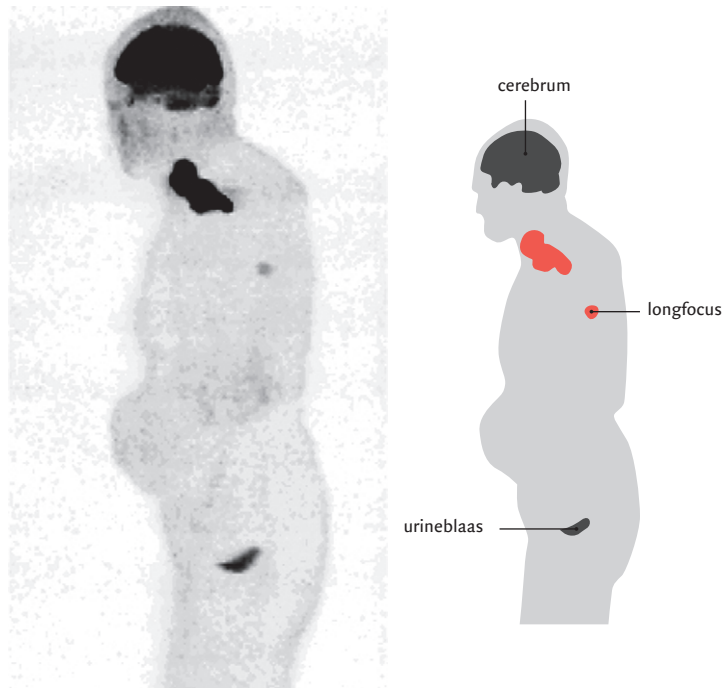

FIGUUR 2. Lateraal aanzicht van een fluor-18-deoxyglucose-positronemissietomografie(FDG-PET)-scan van patiënt B: er wordt een diffuus sterk toegenomen opname gezien in een fors vergrote schildklier; tevens kleurt een primaire longtumor aan.

operatie. Vanwege toenemende groei van de rechter schildklierkwab met druk op de trachea stemde zij echter een half jaar later alsnog in met een totale thyroïdectomie. Pathologisch onderzoek toonde een folliculair schildkliercarcinoom van de rechter kwab met uitgebreide vaatinvastie. Patiënte kreeg aansluitend een ablatieve behandeling met radioactief jodium (<sup>131</sup>I). Ruim 1 jaar na de laatste behandeling manifesteerden zich bij haar uitgebreide metastasen van zowel het longcarcinoom als het schildkliercarcinoom.

Bij patiënt C, een vrouw van 64 jaar, werd een groot ruimtinnemend proces van 8 bij 9 cm gevonden dat uitging van de rechter bijnier; het beeld paste bij bijnierschorscarcinoom. Op een CT-scan waren geen aanwijzingen voor longmetastasen te zien. De tumor werd chirurgisch verwijderd met resectie van segment 6 en 7 van de lever wegens lokale doorgroei. Histologisch onderzoek bevestigde de diagnose 'bijnierschorscarcinoom'. Het leverpreparaat toonde eveneens lokale doorgroei en een in toto verwijderde levermetastase. Bij verder disseminatieonderzoek met behulp van FDG-PET-scintigrafie werd een intense solitaire opname gevonden in het schildklierbed, zonder opname elders. Echogelegeide punctie van een nodus in de schildklier toonde het cytologische beeld van een papillair schildkliercarcinoom. Ondanks de onzekere prognose van het bijnierschorscarcinoom koos patiënte voor behandeling van het schildkliercarcinoom. Zij onderging een totale thyroïdectomie, waarbij een multifocaal papillair schildkliercarcinoom werd gevonden; de grootste haard had een diameter van 1,6 cm. Een half jaar na de ablatietherapie was de diagnostische <sup>131</sup>I-scan na thyroxineonttrekking negatief en de thyreoglobulineconcentratie in het bloed was lager dan de detectiegrens. Bij follow-up ruim 2 jaar na deze behandelingen was patiënte in goede conditie en waren er geen aanwijzingen voor een recidief van het bijnier- of het schildkliercarcinoom.

Bij patiënt D, een 78-jarige man, vond een chirurgische verwijdering plaats van een grote gastro-intestinale stromaceltumor (GIST) die uitging van het meso-ileum. Korte tijd later werden echter levermetastasen ontdekt, waarop werd begonnen met imatinib-behandeling. Een FDG-PET-scan, gemaakt vóór de aanvang van deze medicatie, toonde een zeer intense haard in de rechter schildklierkwab. Bij lichamenlijk onderzoek werd een multinodulair struma gepalpeerd zonder dominante nodus. Echografie toonde een vergrote, inhomogene schildklier met een deels solide, deels cysteuze nodus. Cytologisch onderzoek van een punctaat van deze nodus liet atypische cellen zien waarbij maligniteit werd vermoed. In overleg met patiënt werd besloten voorlopig het effect van de behandeling met imatinib af te wachten, aangezien zijn levensverwachting waarschijnlijk vooral door de GIST bepaald zou worden.

## BESCHOUWING

**De prevalentie van schildkliernodi.** Schildkliernodi komen vaak voor. Palpabele schildkliernodi worden bij 4-7% van de bevolking gevonden.<sup>1</sup> Bij hogeresolutie-echografie wordt bij 19-67% van de normale populatie een schildkliernodus gevonden en bij obductie bij 30-60%.<sup>2</sup> Nodi komen vaker voor bij vrouwen en de incidentie neemt toe met de leeftijd.

**Het risico op maligniteit bij een schildklierincidentaloom.** Van de asymptomatische, palpabele nodi blijkt bij nader onderzoek 4% (uitersten: 0,45-13) maligne.<sup>2</sup> Van de niet-palpabele incidentalomen van de schildklier, gevonden via echografie, blijkt bij cytologisch onderzoek van een fijnaald-aspiraats 10-20% maligne te zijn.<sup>3,4</sup> Vaak is er een papillair microcarcinoom, met een diameter < 10 mm. Uit obductiestudies is zelfs bekend dat tot 35% van de normale populatie papillaire microcarcinomen heeft.<sup>5</sup> De incidentie van klinisch manifeste schildkliercarcinomen is echter slechts 1-3 per 100.000 personen per jaar. Men neemt daarom aan dat een groot deel van deze microcarcinomen indolent is. Deze veronderstelling wordt ondersteund door de resultaten van een onderzoek bij 162 patiënten met een papillair microcarcinoom die ervoor gekozen hadden om niet geopereerd te worden.<sup>6</sup> Slechts 10% van de gevonden nodi werd gedurende de follow-upperiode van 8 jaar groter dan 10 mm en bij slechts 1,2% ontstonden lymfkliermetastasen. In de conceptrichtlijn 'Gedifferentieerd schildkliercarcinoom' wordt daarom geadviseerd om geen invasief onderzoek te doen bij een incidentaloom van de schildklier, tenzij er risicofactoren voor een schildkliercarcinoom zijn ([www.cbo.nl/product/richtlijnen/folder20021023121843/concept\\_schildkc\\_2006.pdf](http://www.cbo.nl/product/richtlijnen/folder20021023121843/concept_schildkc_2006.pdf)). Hiermee kan worden voorkomen dat er wegens microcarcinomen onnodige schildklieroperaties worden verricht met morbiditeit en zelfs sterfte als mogelijk gevolg.

**De diagnostische waarde van non-invasieve onderzoeken.** Tot nu toe is er geen non-invasief diagnosticum waarmee benigne en maligne schildkliernodi goed van elkaar kunnen worden onderscheiden. Met echografie kunnen meerdere kenmerken van een schildkliernodus beschreven worden. Hypo-echogeniteit, irregulaire begrenzing, ontbreken van een halo, centrale calcificaties en hypervascularisatie lijken de kans op maligniteit te vergroten.<sup>7,8</sup> Deze kenmerken of combinaties hiervan zijn echter onvoldoende om daarop het onderscheid tussen goed- en kwaadaardig te baseren.

**FDG-PET.** FDG-PET is een nieuwe afbeeldingstechniek die vooral in de oncologie steeds vaker wordt toegepast. De ingespoten FDG gedraagt zich als glucose en wordt sterk geconcentreerd in weefsels met een hoge metabole activiteit, zoals tumorweefsel en actieve ontstekingsprocessen.

**Incidentalomen gevonden via FDG-PET.** In de dagelijkse praktijk vindt men regelmatig onverwachte haarden met hoge activiteit die niet samenhangen met het probleem

waarvoor de FDG-PET-scan werd aangevraagd. Bij 1,2-2,3% van de FDG-PET-scans wordt een incidentaaloom van de schildklier gevonden.<sup>9-11</sup> De afwijkingen kunnen haardvormig zijn, zoals bij patiënt A, of diffuus, zoals bij patiënt B. Van deze FDG-PET-positieve schildklierafwijkingen blijkt 27-50% maligne te zijn, een veel hoger percentage dan is vastgesteld bij incidentalomen die via echografie of CT werden gevonden.<sup>9-11</sup>

Of de met FDG-PET gevonden schildklier carcinoomen klinisch manifest of indolent zijn, is onbekend. In een retrospectief onderzoek werd wel gevonden dat FDG-positiviteit correleert met een kortere overleving van patiënten bij wie men denkt aan een recidief of aan metastasen van een schildklier carcinoom.<sup>12</sup> Patiënt A had, gezien de histologische uitslag 'medullair schildklier carcinoom', zeker baat gehad bij vroegtijdige ontdekking en patiënt C mogelijk ook. Bij patiënt B was de klinische progressie van haar struma de reden om chirurgisch in te grijpen.

**FDG-PET ter evaluatie van een bekende schildkliernodus.** FDG-PET kan gebruikt worden in de diagnostiek van schildkliernodi wanneer het cytologisch onderzoek bij herhaling geen uitsluitsel geeft. Het huidige beleid bestaat in een diagnostische hemithyreoïdectomie; daarbij blijkt dat slechts 20% van de nodi een carcinoom is. Misschien is het mogelijk om met FDG-PET het aantal onnodige schildklieroperaties te verminderen door betere selectie vooraf. In een onderzoek bij 44 patiënten die een onduidelijke cytologische uitslag hadden en die allen geopereerd werden, bleken 19 (43%) een toegenomen opname van FDG bij PET-scintigrafie te hebben.<sup>13</sup> Bij 30% van degenen met een positieve scan bleek de nodus maligne. Alle nodi van de 25 patiënten met een negatieve PET-scan bleken benigne. In een andere studie van 33 FDG-PET-negatieve nodi bleken er toch 3 carcinoomen te zijn.<sup>14</sup> Meer prospectief onderzoek is nodig om de waarde van FDG-PET bij een onduidelijke cytologische uitslag te bepalen.

**Overige overwegingen.** In hoeverre er invasieve diagnostiek plaatsvindt en of er een schildklieroperatie wordt uitgevoerd, is natuurlijk sterk afhankelijk van de primaire aandoening waarvoor de FDG-PET wordt verricht. Veelal gaat het om een maligniteit met een veel slechtere prognose dan een schildklier carcinoom, bijvoorbeeld een longcarcinoom. Terughoudendheid is zeker geboden tot duidelijk is of de patiënt nog een goede levensverwachting heeft. Dit is geïllustreerd in de ziektegeschiedenissen van de patiënten C en D.

## CONCLUSIE

Het gebruik van steeds gevoeliger afbeeldingstechnieken leidt tot dilemma's. FDG-PET-positieve afwijkingen in de schildklier blijken vaak maligne te zijn. Bij nodi die via echografie of palpatie gevonden worden, zijn de percentages

maligne schildklier aandoeningen veel lager. Er bestaat daarom bij FDG-PET-positieve nodi een sterke indicatie voor verder onderzoek naar een eventuele schildkliermaligniteit. Samen met de patiënt moet de arts echter afwegen wat het nut van verder onderzoek is in relatie tot de oorspronkelijke ziekte waarvoor de PET werd verricht.

FDG-PET heeft mogelijk ook een rol in de beoordeling van schildkliernodi, maar die kan pas bepaald worden na meer prospectief onderzoek.

Belangenconflict: geen gemeld. Financiële ondersteuning: geen gemeld.

Aanvaard op 14 maart 2007

---

## Literatuur

- 1 Rojeski MT, Gharib H. Nodular thyroid disease. Evaluation and management. *N Engl J Med.* 1985;313:428-36.
- 2 Tan GH, Gharib H. Thyroid incidentalomas: management approaches to nonpalpable nodules discovered incidentally on thyroid imaging. *Ann Intern Med.* 1997;126:226-31.
- 3 Papini E, Guglielmi R, Bianchini A, Crescenzi A, Taccogna S, Nardi F, et al. Risk of malignancy in nonpalpable thyroid nodules: predictive value of ultrasound and color-Doppler features. *J Clin Endocrinol Metab.* 2002;87:1941-6.
- 4 Nam-Goong IS, Kim HY, Gong G, Lee HK, Hong SJ, Kim WB, et al. Ultrasonography-guided fine-needle aspiration of thyroid incidentaloma: correlation with pathological findings. *Clin Endocrinol (Oxf).* 2004;60:21-8.
- 5 Kovacs GL, Gonda G, Vadasz G, Ludmany E, Uhrin K, Gorombey Z, et al. Epidemiology of thyroid microcarcinoma found in autopsy series conducted in areas of different iodine intake. *Thyroid.* 2005;15:152-7.
- 6 Ito Y, Uruno T, Nakano K, Takamura Y, Miya A, Kobayashi K, et al. An observational trial without surgical treatment in patients with papillary microcarcinoma of the thyroid. *Thyroid.* 2003;13:381-7.
- 7 Rago T, Vitti P, Chiovato L, Mazzeo S, de Liperi A, Miccoli P, et al. Role of conventional ultrasonography and color flow-doppler sonography in predicting malignancy in 'cold' thyroid nodules. *Eur J Endocrinol.* 1998;138:41-6.
- 8 Kakkos SK, Scopa CD, Chalmoukis AK, Karachalios DA, Spiliotis JD, Harkoftakis JG, et al. Relative risk of cancer in sonographically detected thyroid nodules with calcifications. *J Clin Ultrasound.* 2000;28:347-52.
- 9 Cohen MS, Arslan N, Dehdashti F, Doherty GM, Lairmore TC, Brunt LM, et al. Risk of malignancy in thyroid incidentalomas identified by fluorodeoxyglucose-positron emission tomography. *Surgery.* 2001;130:941-6.
- 10 Chu QD, Connor MS, Lilien DL, Johnson LW, Turnage RH, Li BD. Positron emission tomography (PET) positive thyroid incidentaloma: the risk of malignancy observed in a tertiary referral center. *Am Surg.* 2006;72:272-5.
- 11 Kim TY, Kim WB, Ryu JS, Gong G, Hong SJ, Shong YK. 18F-fluorodeoxyglucose uptake in thyroid from positron emission tomogram (PET) for evaluation in cancer patients: high prevalence of malignancy in thyroid PET incidentaloma. *Laryngoscope.* 2005;115:1074-8.
- 12 Robbins RJ, Wan Q, Grewal RK, Reibke R, Gonen M, Strauss HW, et al. Real-time prognosis for metastatic thyroid carcinoma based on 2-[18F]fluoro-2-deoxy-D-glucose-positron emission tomography scanning. *J Clin Endocrinol Metab.* 2006;91:498-505.
- 13 Geus-Oei LF de, Pieters GF, Bonenkamp JJ, Mudde AH, Bleeker-Rovers CP, Corstens FH, et al. 18F-FDG PET reduces unnecessary hemithyroidectomies for thyroid nodules with inconclusive cytologic results. *J Nucl Med.* 2006;47:770-5.

- 14 Mitchell JC, Grant F, Evenson AR, Parker JA, Hasselgren PO, Parangi S. Preoperative evaluation of thyroid nodules with 18FDG-PET/CT. *Surgery*. 2005;138:1166-74.

---

#### Abstract

**Four patients with incidentalomas of the thyroid discovered on 18-fluoro-deoxyglucose positron-emission tomography (FDG-PET).** – In 4 patients, an incidentaloma of the thyroid was found on 18-fluoro-deoxyglucose positron-emission tomography (FDG-PET). In the first patient, a 73-year-old man, a medullary thyroid carcinoma was discovered during the staging procedure of a laryngeal carcinoma. In the second patient, an

81-year-old woman, a follicular thyroid carcinoma was found as a result of a FDG-PET evaluation of an adenocarcinoma of the lung. In the third patient, a 64-year-old woman, a papillary thyroid carcinoma was found during dissemination investigation after curative removal of an adrenocortical carcinoma. The last patient, a 78-year-old man, was found to have a thyroid incidentaloma on FDG-PET scan during staging of a recurrence of a gastrointestinal stromal tumour. Thyroid incidentalomas are present on 1.2-2.3% of FDG-PET scans. Further diagnostic work-up of these lesions by fine needle aspiration is warranted since up to 50% are malignant. However, whether these malignant thyroid lesions are relevant is not always clear. Treatment depends on the primary disease for which the FDG-PET scan was initially made. This requires good evaluation and discussion with the patient.

*Ned Tijdschr Geneeskd*. 2007;151:2337-41
