# Supplementary material
Source: PubMed Central journal article supplement (PMC7120863)
Supplement: 978-90-368-1841-4_2_MOESM10_ESM.pdf [file 978-90-368-1841-4_2_MOESM10_ESM.pdf]

## KLINISCHE LES

## FDG-PET/CT bij stadiëring van mammacarcinoom

## TOEPASSING BIJ TUMORSTADIUM III EN LOCOREGIONAAL RECIDIEF

Ben F. Bulten, Marie J. de Haas, Cees J. Rodenburg, Bart van Ooijen, Inge O. Baas en John M.H. de Klerk

## DAMES EN HEREN,

Bij patiënten met mammacarcinoom in stadium III vindt standaard disseminatieonderzoek plaats voordat de behandeling begint. Dit onderzoek bestaat uit echografie van de lever, een röntgenfoto van de thorax en skeletscintigrafie (botscan). Recent onderzoek wees echter uit dat fluorodeoxyglucose (FDG)-PET/CT de 3 conventionele onderzoeken kan vervangen in de stadiëring van het mammacarcinoom. In deze klinische les bespreken wij 3 patiënten bij wie, naast standaard disseminatieonderzoek, FDG-PET/CT werd toegepast.

Wanneer bij een patiënt een mammacarcinoom vermoed wordt, voert men een echogeleide punctie uit om de aard van de afwijking en eventuele uitzaaiing naar lymfklieren in de okselregio te bepalen. Aanvullend kan nog een MRI verricht worden, bijvoorbeeld als er op basis van echo- of röntgenonderzoek verdenking is op multifocaliteit van de tumor of als de patiënt een verhoogde kans op een bilaterale tumor heeft.<sup>1</sup>

Als de patholoog een mammacarcinoom vaststelt, komt de TNM-stagering in beeld (tabel). Het is van vitaal belang om onderscheid te maken tussen stadium III – waarbij de behandeling wordt gericht op curatie – en stadium IV, wat een indicatie voor palliatieve behandeling is. Disseminatieonderzoek moet dat onderscheid maken. Patiënten met een locoregionaal recidiefmammacarcinoom kunnen in opzet curatief worden geopereerd als er geen metastasen zijn. Adequate stadiëring is daarom ook voor deze patiënten cruciaal.<sup>1</sup>

Men gebruikte tot voor kort een combinatie van echografie van de lever, een röntgenfoto van de thorax en skeletscintigrafie om metastasen op te sporen. De gereviseerde richtlijn ‘Mammacarcinoom’ van het Nationaal Borstkankeronderzoek Nederland (NABON), die eind 2012 werd gepubliceerd, adviseert FDG-PET/CT als alternatief bij de stadiëring van mammacarcinoom in stadium III en bij verdenking op een locoregionaal recidief.<sup>1</sup> Dit advies wordt in de praktijk echter nog onvolgende opgevolgd. Met deze klinische les willen wij laten zien dat deze aarzeling onterecht is.

**Patiënt A**, een 61-jarige vrouw, bezoekt de huisarts in verband met een zelf opgemerkte zwelling in haar rechter borst; door de zwelling trekt ook de tepel wat naar binnen. Zij is altijd gezond geweest en heeft niet eerder

Meander Medisch Centrum, Amersfoort.

Afd. Radiologie en Nucleaire Geneeskunde: drs. B.F Bulten, aios nucleaire geneeskunde (tevens: afd. Radiologie en Nucleaire Geneeskunde, Radboudumc, Nijmegen); drs. M.J. de Haas en dr. J.M.H. de Klerk, nucleair geneeskundigen.

Afd. Medische Oncologie: dr. C.J. Rodenburg en dr. I.O. Baas, internisten-oncologen.

Afd. Chirurgie: dr. B. van Ooijen, chirurg.

Contactpersoon: drs. B. Bulten (ben.bulten@radboudumc.nl).

**TABEL** TNM-indeling van mammacarcinoom<sup>1</sup>

| stadium      | T*                   | N                           | M  |
|--------------|----------------------|-----------------------------|----|
| stadium 0    | T <sub>in situ</sub> | N0                          | M0 |
| stadium IA   | T1†                  | N0                          | M0 |
| stadium IB   | T0-1†                | N1 <sub>micro-invasie</sub> | M0 |
| stadium IIA  | T0-1†                | N1                          | M0 |
|              | T2                   | N0                          | M0 |
| stadium IIB  | T2                   | N1                          | M0 |
|              | T3                   | N0                          | M0 |
| stadium IIIA | T0-2                 | N2                          | M0 |
|              | T3                   | N1-2                        | M0 |
| stadium IIIB | T4                   | N0-2                        | M0 |
| stadium IIIC | T0-4                 | N3                          | M0 |
| stadium IV   | T0-4                 | N0-3                        | M1 |

\* T1: tumor ≤2 cm in grootste diameter;  
 T2: tumor 2 tot 5 cm in grootste diameter;  
 T3: tumor ≥5 cm in grootste diameter;  
 T4: tumor van elke diameter met doorgroei in thoraxwand en/of huid.

† T1 is inclusief T<sub>micro-invasie</sub>.

deelgenomen aan bevolkingsonderzoek. De familie-anamnese is negatief voor mammacarcinoom. Bij lichamelijk onderzoek vindt de huisarts een forse, vast aanvoelende zwelling met intrekkingen en vastzittend aan de huid, en vergrote lymfklieren in de oksel. Hij stuurt haar door naar de chirurg, die een echogeleid naaldbipt van mamma en oksel laat doen.

De uitslag van pathologisch onderzoek luidt: invasief ductaal carcinoom, positief voor oestrogenreceptor en progesteronreceptor, met uitzaaiingen naar lymfklieren in de rechter oksel, TNM-stadium cT4N+. Volgens protocol adviseert het multidisciplinair overleg (MDO) disseminatieonderzoek van het mammacarcinoom middels echografie van de lever, conventioneel röntgenonderzoek van de thorax en skeletscintigrafie. Dit onderzoek toont geen aanwijzingen voor metastasen; de classificatie komt dus uit op stadium IIIB (T4N1M0).

Na aandringen door de nucleair geneeskundige wordt een FDG-PET/CT verricht (figuur 1). Deze toont meerdere lymfkliermetastasen (rechts axillair, rechts hilar en links mediastinaal), multipale intrapulmonale noduli die verdacht zijn voor metastase, en met zekerheid een metastase links in het sacrum (figuur 2); daarmee wordt de ziekte geassocieerd als T4N3M1, dus stadium IV.

De internist-oncoloog behandelt haar palliatief met een aromataseremmer. Dit induceert een uitstekende respons, getuige de FDG-PET/CT die 4 maanden later wordt verricht. Deze toont een afname van metabolisme in de

primaire tumor in de rechter mamma en in de pathologische lymfklieren. Daarnaast is de metabole activiteit van de sacrale metastase genormaliseerd, wat gepaard gaat met sclerosering op de CT-scan (figuur 3). De intrapulmonale nodi zijn op deze scan niet meer terug te vinden.

**Patiënt B**, een 55-jarige vrouw, komt via bevolkingsonderzoek bij de oncologisch chirurg terecht met een afwijking in de rechter borst. Zij is verder gezond, al is enkele jaren geleden met een conusexscisie een intraductaal papilloom uit dezelfde borst verwijderd. Bij een nicht en een tante is eerder al de diagnose 'mammacarcinoom' gesteld.

Onderzoek van het naaldbipt van de afwijking toont een ductaal carcinoom in situ (DCIS), graad 3. Op voorstel van het MDO worden een lumpectomie en een schildwachtklierprocedure uitgevoerd. Pathologisch onderzoek van het bij lumpectomie verwijderde weefsel toont zowel multifocaal DCIS als een invasief carcinoom met lobulaire groeiwijze dat niet volledig verwijderd is; verder blijkt de schildwachtklier positief voor tumorweefsel. In het MDO wordt nu re-resectie en okselklierdissectie geadviseerd. Pathologisch onderzoek van het resectiepreparaat toont een multifocaal slecht gedifferentieerd adenocarcinoom met een maximale diameter van 0,9 cm en 4 lymfkliermetastasen; de TNM-status is pT1N2Mx (stadium III).

Aangezien er 4 lymfkliermetastasen zijn gevonden bij

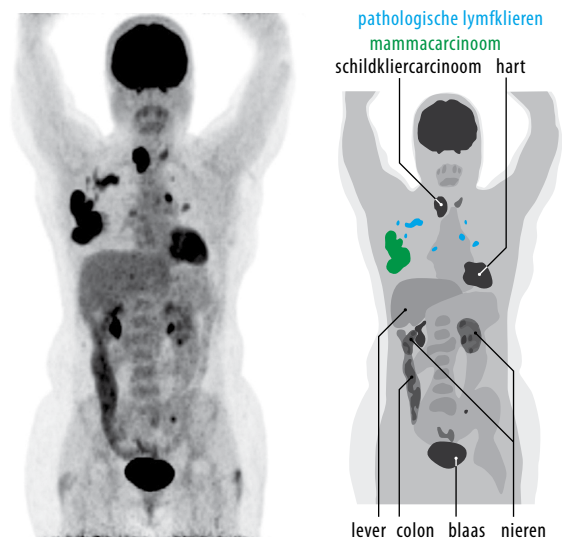

**FIGUUR 1** FDG-PET/CT-opname van patiënt A (frontaal aangezicht). Op dit overzicht zijn de afwijkingen duidelijk zichtbaar door een fors verhoogde FDG-opname. Hierbij is een afwijking in de schildklier zichtbaar, die berust op papillair schildkliercarcinoom; dit is een toevalsbevinding. Figuur 2 toont details op transversale coupes van deze scan.

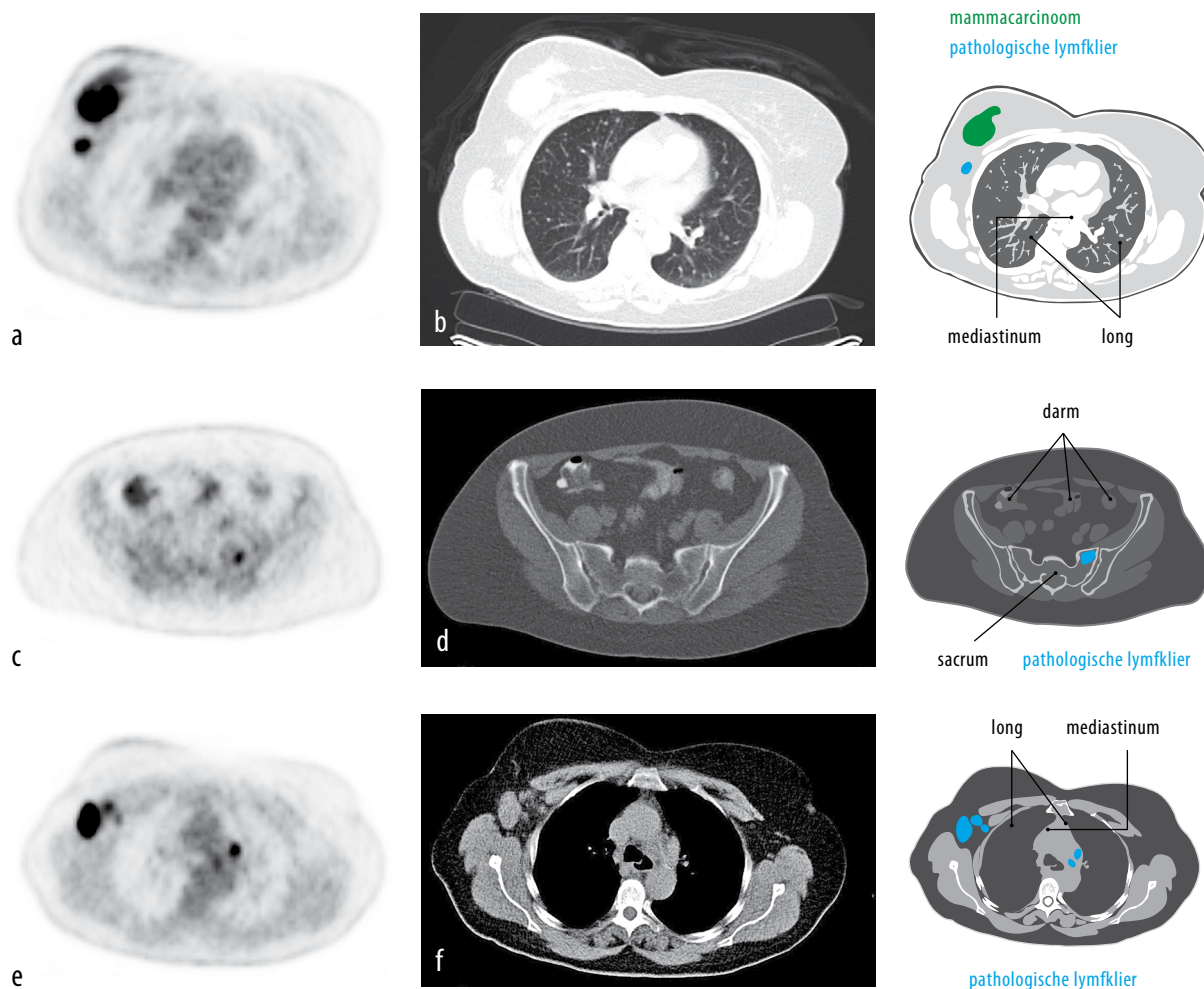

**FIGUUR 2** FDG-PET/CT-opname (transversale coupes) van patiënt A ter hoogte van (a,b) de primaire tumor, (c,d) het sacrum en (e,f) de axillaire en mediastinale lymfkliermetastasen. De opname van  $^{18}\text{F}$ -fluorodeoxyglucose is duidelijk verhoogd in de primaire tumor (a), de botmetastase (c) en de lymfkliermetastasen van het mammacarcinoom.

deze kleine tumor wordt er conventioneel disseminatie-onderzoek uitgevoerd. De thoraxfoto en skeletscintigrafie laten geen metastasen zien; de echo van de lever toont 2 hypo-echogene afwijkingen met een maximale diameter van respectievelijk 1,0 en 1,4 cm, verdacht voor metastasen; de radioloog adviseert aanvullend CT-onderzoek van het abdomen. Op de CT-scan kan onvoldoende onderscheid gemaakt worden tussen cyste, hemangioom en metastase en daarnaast wordt in de linker bijnier een afwijking gezien die verdacht is voor een metastase. Uiteindelijk wordt een FDG-PET/CT-scan gemaakt, waarop geen verhoogde stapeling in de leverafwijkingen zichtbaar is. De bijnierafwijking blijkt een adenoom te zijn. De FDG-PET/CT-scan toont aan dat er geen gemetastaseerde ziekte is, wat neerkomt op een verschuiving

van de TNM-status van pT1N2M1 (stadium IV) volgens het conventionele beeldvormend onderzoek naar pT1N2M0 (stadium III). De internist-oncoloog behandelt patiënte met adjuvante chemotherapie, gevolgd door hormoontherapie en radiotherapie. 6 jaar na het afronden van de behandeling is patiënte nog steeds ziektevrij. Op controle-echo's is de grootte van de leverafwijkingen ongewijzigd.

**Patiënt C**, een 78-jarige vrouw, wordt door de huisarts doorgestuurd naar de oncologisch chirurg met een pijnlijke zwelling in de linker axilla. Zij heeft in het verleden mammacarcinoom links gehad, waarvoor zij een mastectomie met okselklierdissectie heeft ondergaan. Na naaldbiopsie van de zwelling blijkt er sprake te zijn van een

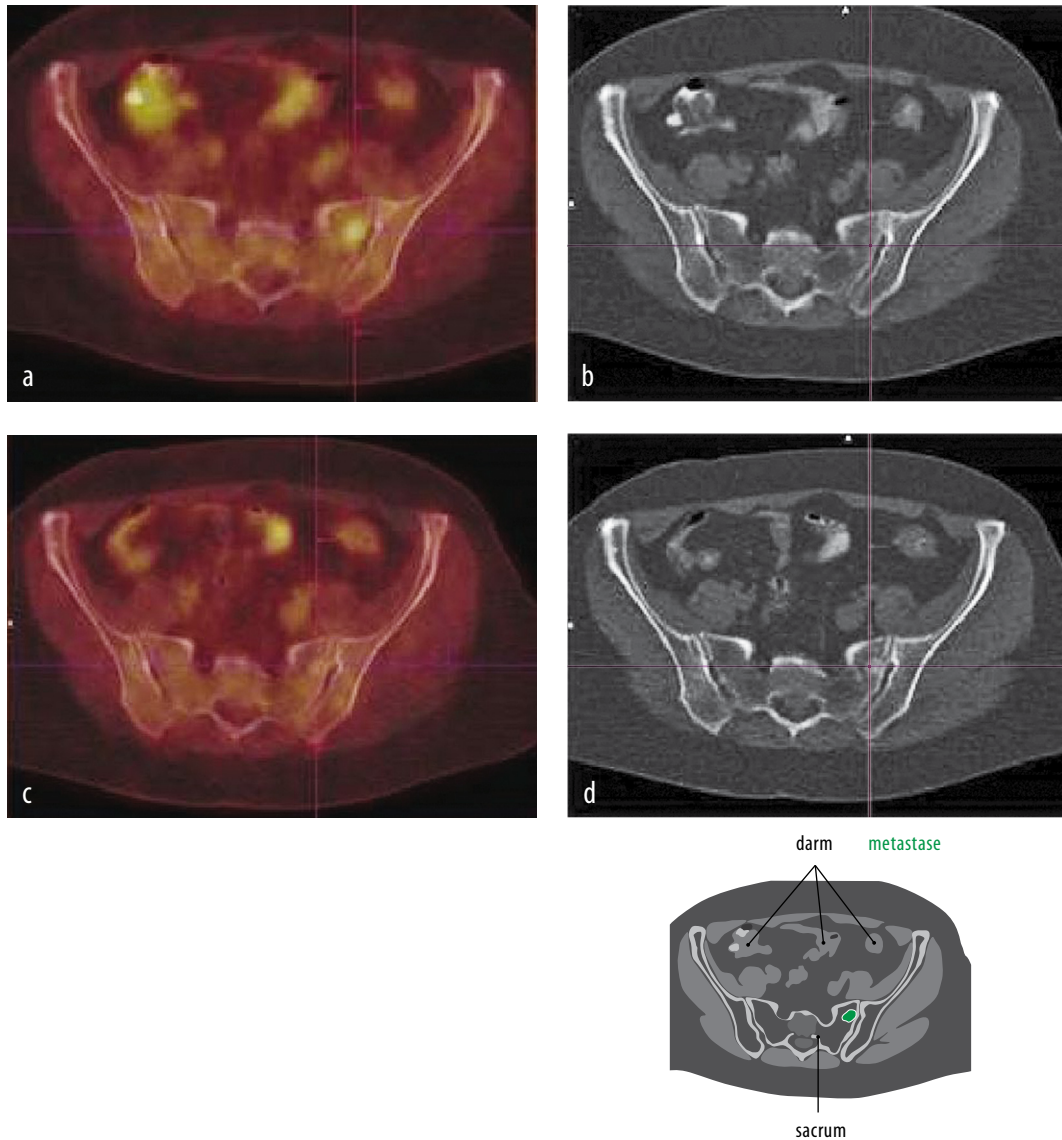

**FIGUUR 3** FDG-PET/CT-opname (transversale coupe) van het sacrum van patiënt A vóór (a,b) en na (c,d) palliatieve behandeling wegens mammacarcinoom. Vóór behandeling met aromataseremmers werd verhoogde stapeling gezien in de metastase links in het sacrum (figuur a). 4 maanden later was het metabolisme op deze plaats genormaliseerd (figuur c); de CT-scan (figuur d) toont sclerosering van de afwijking, die op de eerste CT-scan niet zichtbaar was (figuur a). Zowel de normalisatie van metabolisme als de sclerosering duiden op een respons.

infiltrerend mammacarcinoom. Voor de resectie van het okselrecidief vindt er disseminatieonderzoek plaats. Een röntgenfoto van de thorax en een echo van het abdomen laten geen afwijkingen zien. Skeletscintigrafie toont verhoogde activiteit ter plaatse van de 7e rib rechts ventraal, mogelijk een metastase (figuur 4); hiervoor wordt nader beeldvormend onderzoek geadviseerd.

De oncologisch chirurg laat daarom FDG-PET/CT verrichten, die de bekende zwelling in de axilla laat zien,

maar elders geen metastasen aantoonde. De afwijking in de 7e rib vertoont geen verhoogde activiteit op de FDG-PET-scan. In het resectiepreparaat van het locoregionale recidief wordt een matig gedifferentieerd infiltrerend ductaalcarcinoom met een maximale diameter van 1,4 cm gevonden.

De FDG-PET/CT-scan heeft er bij deze patiënte aan bijgedragen dat er met veel meer zekerheid gekozen kan worden voor adjuvante regionale radiotherapie en hor-

monale therapie bij dit locoregionale recidief van mammacarcinoom.

## BESCHOUWING

Bij FDG-PET/CT wordt gebruik gemaakt van een radioactief gelabeld glucose-analoon – fluorodeoxyglucose F18 – om het gehele lichaam af te beelden. Dit is een accurate techniek gebleken voor de stadiëring, re-stadiëring en bepaling van therapierespons van diverse tumoren en voor de detectie van occulte primaire tumoren en metastasen.<sup>2,3</sup> De CT-component zorgt voor de specificiteit van opgespoorde afwijkingen,<sup>4,5</sup> maar ook voor het correct lokaliseren van de gevonden afwijkingen. In de gereviseerde richtlijn ‘Mammacarcinoom’ van het NABON wordt FDG-PET/CT geadviseerd als alternatief voor het conventionele stadiëringsonderzoek bij patiënten met mammacarcinoom stadium III en bij de verdenking op een locoregionaal recidief.<sup>1</sup>

De besproken ziektegeschiedenissen illustreren de toegevoegde waarde van FDG-PET/CT. Bij patiënt A zagen wij een verschuiving naar een hoger tumorstadium, waardoor zij een andere behandeling kreeg. Haar is een uitgebreide operatie met eventuele complicaties bespaard gebleven en zij kreeg nu de juiste therapie, waarop zij een goede respons vertoonde.

De resultaten van verschillende onderzoeken pleiten voor het gebruik van FDG-PET, al dan niet in combinatie met CT, om metastasen op afstand op te sporen. In een prospectief onderzoek bij 60 patiënten, waarbij FDG/PET (dus nog zonder CT) werd vergeleken met conventioneel beeldvormend onderzoek in de stadiëring van grote mammacarcinomen (diameter: > 3 cm), werd een sensitiviteit van 100% en een specificiteit van 98% behaald, tegen respectievelijk 60% en 93% voor conventioneel beeldvormend onderzoek.<sup>6</sup> In een andere studie onder 119 patiënten waren de sensitiviteit en specificiteit respectievelijk 87% en 83%, vergeleken met 43% en 98% voor conventioneel beeldvormend onderzoek en 83% en 85% voor CT.<sup>7</sup> Een derde studie ten slotte vond bij 17 van de 60 onderzochte patiënten (28%) FDG-positieve extra-axillaire lymfklieren, wat de stadiëring en de behandeling uiteraard kan beïnvloeden.<sup>8</sup> De casus van patiënt B laat zien dat verschuiving naar een lager stadium van ziekte door toepassing van FDG-PET/CT ook tot de mogelijkheden behoort.

Uit de casus van patiënt C blijkt dat FDG-PET/CT tevens van pas kan komen bij verdenking op een locoregionaal recidief. In een grote systematische review uit 2010, waarin vooral studies met alleen FDG-PET (zonder CT) werden beschouwd, bleek deze techniek een hogere sensitiviteit en specificiteit te hebben dan conventioneel beeldvormend onderzoek bij de detectie van locoregio-

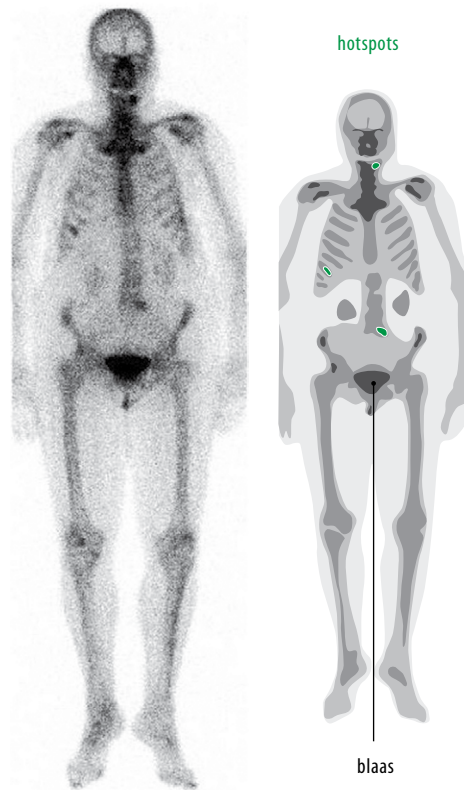

**FIGUUR 4** Skeletsintigrafie van patiënt C, waarop een focaal verhoogde stapeling ('hotspot') zichtbaar is aan het uiteinde van de rechter 7e rib, bij de wervelovergang L5-S1 (op basis van artrose) en links in de onderkaak (tandprobleem). De afwijking in de 7e rib is verdacht voor een metastase van mammacarcinoom. Op de FDG-PET/CT-scan werd ter plaatse van deze afwijking echter geen verhoogd metabolisme gezien.

nale recidieven en metastasen op afstand. FDG-PET had een significant hogere sensitiviteit dan CT; de specificiteit was ook hoger, maar dat verschil was statistisch niet significant.<sup>9</sup>

Wanneer aan FDG-PET lagedosis-CT wordt toegevoegd, wat tegenwoordig in Nederland gemeengoed is, valt aan te nemen dat de specificiteit nog verder wordt verhoogd.<sup>4</sup> Dit wordt nog niet gestaafd door grote vergelijkende onderzoeken op het gebied van mammacarcinoom, maar feitelijk is FDG-PET zonder CT vrijwel niet meer beschikbaar in Nederland en is de vergelijking tussen FDG-PET en FDG-PET/CT alleen in theorie mogelijk.

### VOORDELEN VAN FDG-PET/CT

FDG-PET/CT is patiëntvriendelijker dan conventioneel disseminatieonderzoek. De duur van het totale onderzoek bedraagt 2 uur (inclusief 60 min incubatietijd) en de patiënt hoeft maar 1 keer naar het ziekenhuis te komen.

## LEERPUNTEN

- Met fluorodeoxyglucose (FDG)-PET worden glucose-metaboliserende processen zoals maligniteiten in beeld gebracht.
- De combinatie van FDG-PET en CT preciseert het tumorstadium en geeft prognostische informatie bij patiënten met mammacarcinoom.
- De landelijke richtlijn 'Mammacarcinoom' adviseert FDG-PET/CT in plaats van conventioneel onderzoek (X-thorax, echo abdomen, botscan) voor disseminatieonderzoek bij stadium III mammacarcinoom.
- FDG-PET/CT wordt nog te weinig gebruikt voor disseminatieonderzoek bij patiënten met stadium III mammacarcinoom.

Voor het conventionele onderzoek zijn minimaal 2 bezoeken noodzakelijk en de totale tijdsduur bedraagt circa 6 uur. Bovendien wordt met FDG-PET/CT het hele lichaam gescand en beoordeeld. Ten slotte resulteert juiste stadiëring van patiënten in een verminderde kostendruk, bijvoorbeeld door het voorkómen van operaties en de bijbehorende ziekenhuisopnames of het onnodig inzetten van adjuvante chemoradiatie.

**Dames en Heren**, in de landelijke NABON-richtlijn 'Mammacarcinoom' wordt FDG-PET/CT geadviseerd voor de nadere stadiëring van mammacarcinoom in stadium III ( $\geq 4$  okselkliermetastasen of een tumor groter dan 5 cm met okselkliermetastasen, dan wel doorgroei in de huid of thoraxwand) en bij de verdenking op een loco-regionaal recidief van het mammacarcinoom. Deze modaliteit is in alle Nederlandse ziekenhuizen – al dan niet in samenwerkingsverband – beschikbaar. Wij adviseren het conventionele beeldvormende onderzoek bij deze verschijningsvormen van het mammacarcinoom in zijn geheel te vervangen door FDG-PET/CT. Dat verbetert de stadiëring en voorkomt onterechte behandeling.

Belangenconflict en financiële ondersteuning: geen gemeld.

Aanvaard op 30 januari 2014

Citeer als: Ned Tijdschr Geneesk. 2014;158:A7035

**> KIKJ OOK OP WWW.NTVG.NL/KLINISCHEPRAKTIJK**

## LITERATUUR

- 1 Richtlijn 'Mammacarcinoom' (ed 2.0). NABON; 2012. Integraal Kankercentrum Nederland, [www.oncoline.nl/mammacarcinoom](http://www.oncoline.nl/mammacarcinoom), geraadpleegd op 18 februari 2014.
- 2 Juweid ME, Cheson BD. Positron-emission tomography and assessment of cancer therapy. *N Engl J Med.* 2006;354:496-507.
- 3 Han A, Xue J, Hu M, et al. Clinical value of 18F-FDG PET-CT in detecting primary tumor for patients with carcinoma of unknown primary. *Cancer Epidemiol.* 2012;36:470-5.
- 4 Fueger BJ, Weber WA, Quon A, et al. Performance of 2-deoxy-2-[F-18] fluoro-D-glucose positron emission tomography and integrated PET/CT in restaged breast cancer patients. *Mol Imaging Biol.* 2005;7:369-76.
- 5 Lardinois D, Weder W, Hany TF, et al. Staging of non-small-cell lung cancer with integrated positron-emission tomography and computed tomography. *N Engl J Med.* 2003;348:2500-7.
- 6 Fuster D, Duch J, Paredes P, et al. Preoperative staging of large primary breast cancer with [18F]fluorodeoxyglucose positron emission tomography/computed tomography compared with conventional imaging procedures. *J Clin Oncol.* 2008;26:4746-51.
- 7 Mahner S, Schirrmacher S, Brenner W, et al. Comparison between positron emission tomography using 2-[fluorine-18]fluoro-2-deoxy-D-glucose, conventional imaging and computed tomography for staging of breast cancer. *Ann Oncol.* 2008;19:1249-54.
- 8 Aukema TS, Straver ME, Peeters MJ, et al. Detection of extra-axillary lymph node involvement with FDG PET/CT in patients with stage II-III breast cancer. *Eur J Cancer.* 2010;46:3205-10.
- 9 Pennant M, Takwoingi Y, Pennant L, et al. A systematic review of positron emission tomography (PET) and positron emission tomography/computed tomography (PET/CT) for the diagnosis of breast cancer recurrence. *Health Technol Assess.* 2010;14:1-103.
